# Supplementary material
Source: HighWire-hosted journal article supplement (doi:10.1101/rna.080359.124)
Supplement: Supplemental_Figure_Legends.docx [file Supplemental_Figure_Legends.docx]

**Supplementary Figure S1. *EB120* initiates at an AluJo element and terminates at an RNA polymerase III termination signal. (A)** Annotated genomic loci of *EB120*. *EB120* transcribes EB120 (GenBank accession number PP505732) where +1 of *EB120* is located at Chr1: 116709982 (GRCh38/hg38). EB120 is highlighted by black lettering, while grey lettering represents flanking genomic sequence. The annotation of the AluJo (+1 to +117) of EB120 was determined from previous studies, and as according to RepeatMasker and the UCSC Human Genome Browser RepeatMasker (Martignetti and Brosius 1993; Bao et al. 2015; Englert et al. 2004). **(B)** Frequency distribution of EB120 3' RACE results. The majority of transcripts were identified to contain either three or four uridines, consistent with the RNA polymerase III termination signal of four thymines. Other detected terminal ends include other uridine tracts, or termination at the following RNA polymerase III termination signal.

**Supplementary Figure S2.** **EB120 TaqMan assay is specific.** RT-qPCR EB120 TaqMan assay amplicons for RNA template originating from MCF-7, SK-BR-3, or T-47D cells, or brain, or ovary tissue. 25 ng of total RNA was used as template for each reaction. A single and dominant band is present for all samples, corresponding to an amplicon with a size between 75 and 200 base pairs. This comports with the expected amplicon size of 111 base pairs.

**Supplementary Figure S3. EB120 levels in SK-BR-3 cells decrease over time.** RT-qPCR EB120 TaqMan assay of RNA template originating from SK-BR-3 cells collected at different time points. 25 ng of total RNA was used as template for each reaction.

**Supplementary Figure S4.** **Results of the sedimentation velocity experiment with different concentrations of BC120 in PBS, pH 7.4.** The left most panel demonstrates the fit to the absorbance data at λ = 260 nm and its residuals. The second panel from the left presents the *c*(*s*,*fr*) distribution as calculated in SEDFIT (Meier et al. 2018). In the third panel from the left, the two-dimensional distribution was converted to mass to yield the *c*(*s*,*M*) distribution. The right most panel demonstrates the one-dimensional *c*(*s*) distribution in the upper subplot and the *c*(*s*,***) distribution in the lower subplot. Two species are detected which correspond to a monomeric and likely non-specific interaction forming dimeric species of BC120.

**Supplementary Figure S5. Results of the sedimentation velocity experiment with different concentrations of BC120 G25C in PBS, pH 7.4.** The left most panel demonstrates the fit to the absorbance data at λ = 260 nm and its residuals. The second panel from the left presents the *c*(*s*,*fr*) distribution as calculated in SEDFIT (Meier et al. 2018). In the third panel from the left, the two-dimensional distribution was converted to mass to yield the *c*(*s*,*M*) distribution. The right most panel demonstrates the one-dimensional *c*(*s*) distribution in the upper subplot and the *c*(*s*,***) distribution in the lower subplot. Two species are detected which correspond to a monomeric and likely non-specific interaction forming dimeric species of BC120 G25C.

**Supplementary Figure S6. Results of the sedimentation velocity experiment with different concentrations of EB120 in PBS, pH 7.4.** The left most panel demonstrates the fit to the absorbance data at λ = 260 nm and its residuals. The second panel from the left presents the *c*(*s*,*fr*) distribution as calculated in SEDFIT (Meier et al. 2018). In the third panel from the left, the two-dimensional distribution was converted to mass to yield the *c*(*s*,*M*) distribution. The right most panel demonstrates the one-dimensional *c*(*s*) distribution in the upper subplot and the *c*(*s*,***) distribution in the lower subplot. Two species are detected which correspond to a monomeric and likely non-specific interaction forming dimeric species of EB120.

**Supplementary Figure S7.** **Purified BC120, BC120 G25C, and EB120 RNA are present as a single species. (A)** Elution profile of *in vitro* transcribed BC120 from a 3 mL transcription reaction volume. The RNA was separated from plasmid and free NTPs on a Superdex 75 26/60 gel filtration column. Multiple plasmid peaks are present as the restriction enzyme used for linearization digests the plasmid at multiple locations. **(B)** Same as of (A) but for BC120 G25C. **(C)** Same as of (A) but for EB120.

**Supplementary Figure S8. Apparent diffusion coefficient values of the monomeric species of BC120, BC120 G25C, and EB120 in PBS, pH 7.4.** Linear extrapolation to infinite dilution of the converted apparent diffusion coefficients *D20°C,w* of BC120, BC120 G25C, and EB120 in PBS, pH 7.4. Results were obtained from sedimentation velocity data with direct fitting of *s*, and *D* to the combined Lamm and Svedberg equations for each sample concentration (Schuck 1998, 2003). Linear regression was performed with GraphPad Prism 9 software to obtain a line of best fit. Error bars represent the 68% confidence interval of each data point, while confidence bands demonstrate the likely location of the true curve with a 90% asymmetrical (profile-likelihood) confidence interval.

**Supplementary Figure S9. Apparent sedimentation and diffusion coefficient values of the dimeric species of BC120, BC120 G25C, and EB120 in PBS, pH 7.4. (A)** Converted apparent sedimentation coefficients *s20°C,w* of BC120, BC120 G25C, and EB120 in PBS, pH 7.4. Data was obtained from sedimentation velocity data with direct fitting of *s*, and *D* to the combined Lamm and Svedberg equations for each sample concentration (Schuck 1998, 2003). Error bars represent the 68% confidence interval of each data point. **(B)** Same as of (A) but for converted apparent diffusion coefficients *D20°C,w*.

**Supplementary Figure S10. Predicted SimRNA models of BC120 are similar to each other. (A)** Low resolution SEC-SAXS conformation and SimRNA structure prediction model 1 of BC120 in PBS, pH 7.4. The averaged SEC-SAXS low-resolution model obtained from DAMMIF is extended and asymmetric with one prominent protrusion located on one of its ends, and a bulge on its other end. SimRNA structure predictionmodel 1 of BC120 is overlayed on the SEC-SAXS envelope. Nucleotide structures of G14, G15, C16, G34, C35, U36 are highlighted in yellow. These data are rotated 90° from the top conformation. The scalebar represents *Dmax* obtained from the *P*(*r*) analysis. **(B)** Same as of (A) but for model 2. **(C)** Same as of (A) but for model 3. **(D)** Magnification of the first ~45 nucleotides of the SimRNA structure predictionmodel 1 of BC120 demonstrating two stem loops forming a pseudoknot. The stem loop nearest to the 5’ end is labelled *a* while the following downstream stem loop is labelled *b*. Nucleotide structures highlighted in yellow correspond as to (A). The stem loop nearest to the 5’ end is labelled *a* while the following downstream stem loop is labelled *b*. **(E)** Same as of (D) but for model 2. **(F)** Same as of (D) but for model 3.

**Supplementary Figure S11.** **Predicted SimRNA models of BC120 G25C are similar to each other. (A)** Low resolution SEC-SAXS conformation and SimRNA structure prediction model 1 of BC120 G25C in PBS, pH 7.4. The averaged SEC-SAXS low-resolution model obtained from DAMMIF is extended and asymmetric with one prominent protrusion located on one of its ends, and a bulge on its other end. SimRNA structure predictionmodel 1 of BC120 G25C is overlayed on the SEC-SAXS envelope. Nucleotide structures of G14, G15, C16, G34, C35, U36 are highlighted in yellow. The C25 mutation is highlighted in red. These data are rotated 90° from the top conformation. The scalebar represents *Dmax* obtained from the *P*(*r*) analysis. **(B)** Same as of (A) but for model 2. **(C)** Same as of (A) but for model 3. **(D)** Magnification of the first ~45 nucleotides of the SimRNA structure predictionmodel 1 of BC120 G25C demonstrating two stem loops forming a pseudoknot. The stem loop nearest to the 5’ end is labelled *a* while the following downstream stem loop is labelled *b*. Nucleotide structures highlighted in yellow correspond as to (A). The stem loop nearest to the 5’ end is labelled *a* while the following downstream stem loop is labelled *b*. **(E)** Same as of (D) but for model 2. **(F)** Same as of (D) but for model 3.

**Supplementary Figure S12. Predicted SimRNA models of EB120 are similar to each other. (A)** Low resolution SEC-SAXS conformation and SimRNA structure predictionmodel 1 of EB120 in PBS, pH 7.4. The averaged SEC-SAXS low-resolution model obtained from DAMMIF is extended and y-axis rotationally symmetric and has two prominent protrusions located on its ends. SimRNA structure predictionmodel 1 of EB120 is overlayed on the SEC-SAXS envelope. The backbone of nucleotides G14, G15, C16, A34, C35, A36 are highlighted in yellow. These data are rotated 90° from the top conformation. The scalebar represents *Dmax* obtained from the *P*(*r*) analysis. **(B)** Same as of (A) but for model 2. **(C)** Same as of (A) but for model 3. (D) Magnification of the first ~45 nucleotides of the SimRNA structure predictionmodel 1 of EB120 demonstrating two independent stem loops. The stem loop nearest to the 5’ end is labelled *a* while the following downstream stem loop is labelled *b*. Nucleotide structures highlighted in yellow correspond as to (A). The stem loop nearest to the 5’ end is labelled *a* while the following downstream stem loop is labelled *b*. **(E)** Same as of (D) but for model 2. **(F)** Same as of (D) but for model 3.

**Supplementary Figure S13. AlphaFold 3 predicted structures of BC120 are similar to each other. (A)** AlphaFold 3 structure prediction model 1 of BC120. The backbone nucleotides G14, G15, C16, G34, C35, U36 are highlighted in yellow and are predicted to form the hydrogen bonds of the pseudoknot domain. These data are rotated 90° from the top conformation. **(B)** Same as for (A) but for model 2. **(C)** Same as for (A) but for model 3. **(D)** Magnification of the first ~45 nucleotides of the AlphaFold 3 structure prediction model 1 of BC120 demonstrating a pseudoknot domain. Nucleotide structures correspond as to (A). **(E)** Same as of (D) but for model 2. **(F)** Same as of (D) but for model 3.

**Supplementary Figure S14. AlphaFold 3 predicted structures of BC120 G25C are similar to each other. (A)** AlphaFold 3 structure prediction model 1 of BC120 G25C. The backbone nucleotides G14, G15, C16, G34, C35, U36 are highlighted in yellow and are predicted to form the hydrogen bonds of the pseudoknot domain. The C25 mutation is highlighted in red. These data are rotated 90° from the top conformation. **(B)** Same as for (A) but for model 2. **(C)** Same as for (A) but for model 3. **(D)** Magnification of the first ~45 nucleotides of the AlphaFold 3 structure prediction model 1 of BC120 G25C demonstrating a pseudoknot domain. Nucleotide structures correspond as to (A). **(E)** Same as of (D) but for model 2. **(F)** Same as of (D) but for model 3.

**Supplementary Figure S15. AlphaFold 3 predicted structures of EB120 are similar to each other. (A)** AlphaFold 3 structure prediction model 1 of EB120. The backbone nucleotides G14, G15, C16, A34, C35, A36 are highlighted in yellow. These data are rotated 90° from the top conformation. **(B)** Same as for (A) but for model 2. **(C)** Same as for (A) but for model 3. **(D)** Magnification of the first ~45 nucleotides of the AlphaFold 3 structure prediction model 1 of EB120 demonstrating a lack of a pseudoknot domain. Nucleotide structures correspond as to (A). **(E)** Same as of (D) but for model 2. **(F)** Same as of (D) but for model 3.

**Supplementary Figure S16. Predicted secondary structures of BC120, BC120 G25C, and EB120 from SimRNA and AlphaFold 3 models. (A)** Secondary structure of BC120 derived from the predicted SimRNA tertiary structure model 1. **(B)** Same as of (A) but for BC120 G25C. **(C)** Same as of (A) but for EB120. **(D)** Secondary structure of BC120 derived from the predicted AlphaFold 3 tertiary structure model 1. Nucleotides and hydrogen bonding highlighted in red represent the differences compared to the SimRNA model. **(E)** Same as of (D) but for BC120 G25C. **(F)** Same as of (D) but for EB120.
