# Supplementary material
Source: HighWire-hosted journal article supplement (doi:10.1101/rna.080359.124)
Supplement: Supplemental_Table_S1.xlsx [file Supplemental_Table_S1.xlsx]

## Sheet: Supplementary Table S1
Supplementary Table S1. Alignment of 117-nucleotide AluJo elements to AluJo consensus
>AluJo_consensus
--------------------------------------------------GGCCGG--GC---GCGGTGGCTC-ACGCC----TG-T-AAT------CC----CAGC-A-C-TT-TGGGAG-GCC----GA---GGC------GG------GAGGATCGC-T-------T--------GAG-C-C----CAGGA---GTTC-G-AGAC-CAG-CC-T--GGGCAA-C-ATA-G-TGAG-A---C-CC-CGTCTCTA-------------------------------
>AluJo_1
--------------------------------------------AGCCTGGACAGCACGCGAGACACCGTCTC----------TA-C-AAA------------AAAC-A-C-AT-CAGCAG-CCA----GGTCTGGT-------G------GTGCATGGC-T-------G--------TGGCCCC----CAACT---ACTCGGTGGGC--------TGAGGCTGA---TTGCG-TAAG-------CC-CA-------------------------------------
>AluJo_2
----------------------------------------------------------AT-----------------------TGTTGGAG------CC----CAGG-AGT-TTGAGGATGCATT----GA----GC--------------TATGATCATGC----------------CAGTTGCACCACTGCA---CTCC-A------AAG----T--GAGGAA-C-AGA-A-TAAG-A-----CCTTGCGTCTAAAATAATAATAATAACAA-------------
>AluJo_3
-----------------------------------------------ATTTGCAGG--GC---GTGGTGGCTC-ACACC----TG-T-AAT------CC----CTGCTA-C-CT-----------------------------GT------GAAGATAGC-T-------T--------GAG-C-C----CAGGA---GTTG-G-GGGC-TAC-AG-T--GAGGTA-T--------GAGCA---CACCCCAGTACTCCAGCTTGGGTG--------------------
>AluJo_4
--------------------------------------------------GGCCAG--AC---CCAGTGGCAC-ATGCC----TC-T-AAT------CC----CAAT-G-C-TT-TGGGCG-ATT----GA---GGT------AG------GAAGGTTAT-T-------A--------GAG-T-T----CACAA---CTTC-G-AGAC-CAC-CA-T--GGGCAA-C-ACA-G-CAAG-A---C-CT-TGTCTCT--------------------------------
>AluJo_5
--------------------------------------------------GGCTGT--GC---ATGGTGGCTC-ATGCC----TG-A-AAC------TG----AAAT-A-C-TT-TGGGAG-ACC----GA---GTG------GG------GAGGATTGC-T-------T--------GAG-C-C----CAGGA---GTTT-G-AAAG-CTG-TC-A--GGGCAA-C-ATA-G-TGAG-G---C-TA-CATCTCT--------------------------------
>AluJo_6
--------------------------------------------------GGCCAG--CC---ACAGTGGCTC-ACACC----TG-T-AAT------CC----TAAC-A-T-TC-TGAGAGGTTA----GA---AGC------AA------GAGGATGGC-T-------T--------GAG-C-C----CAGGC---ATTT-G-CAGC-CAG-CC-T--GAGAAA-T-AGA-G-CGAG-A---C-CC-TGTCTC---------------------------------
>AluJo_7
--------------------------------------------------GGCTGA--GC---ATGGTGGCTT-ATGCT----TG-T-AAT------CC----CAGA-A-T-TT-TGGTAG-GCT----GA---GGC------GA------GTGAACTGT-G-------T--------GAG-C-C----CAGGA---GTTC-C-AGAC-AAG-CC-T--GGGTAA-C-ATG-G-CGAG-A---T--C-TGTCTCCA-------------------------------
>AluJo_8
--------------------------------------------------GGCTGG--AC---AAGGTGGCTC-ATGCC----TG-T-AAT------CC----CAAC-A---CT-TGGGAG-ACC----AG---GAT------GA------CTGGACTGC-T-------C--------GAG-C-C----TGGGA---GTTC-G-AGAC-CAG-CC-T--GGGCAA-C-ATA-G-CGAG-A----TGC-TGTCGCTA-------------------------------
>AluJo_9
----------------------------------------------------------GC---ATGGTGGCAT-GCGCT----TG-T-AAT------CT----CAGC-T-C-CT-TGGGAG-GCT----GA---GGC------AA------GGTGTTCAC-T-------T--------GAT-C-C----CAGGA---GTTC-G-AGAC-CAT-CT-G--GGGCAA-C-ATA-G-CAAG-A---T-CT-CATCTCAAAAATA--------------------------
>AluJo_10
-----------------------------------------------------------------------TT-ATGCC----TG-T-AAT------CC----CAGT-G-C-TT-TGGAAG-GCC----AT---GGT------GG------GAGGGTCAC-T-------G--------AAG-C-C----CAGAA---ATTT-G-AGAC-CAG-TT-T--TAGCAA-C-ATA-G-GAAG-A---C-CC-CTTCTCTACAAAAAATAAAAAAT----------------
>AluJo_11
---------------------------------------------------GTTGG--GC---AAGGGGGCTC-ACACC----TG-T-AAT------CC----CAGC-A-CACT-TGTAAT-CCC------------------AG------GAGGGTCGC-T-------T--------GAG-C-C----CAGGA---GTTT-A-AGGC-CAG-CC-C--GGGCAA-C-ATA-G-CAA--------CC-TGTTTGTAGGCAAAA------------------------
>AluJo_12
--------------------------------------------------------------------------------------------------------AGA-G-C-TT-TGAGAG-ACC----AC---AGT------GA------GAGGATCAC-T-------T--------GAG-C-C----CAGAA---GTTC-A-AGAC-CAG-CC-T--GAGCGA-C-ATA-A-CAAG-A---C-AT-CATCTCTTTTAAGTAGCCAGGAATGCTAGCACCCACCCA
>AluJo_13
---------------------------------------------------GCCGG--GC---GCGATGGCTC-ATACC----TG-C-AAC------CC----CAGC-A-C-TT-AGAGAG-GCC----AA---AGC------GG------ATGGATTGC-T-------T--------GAG-C-C----CAAGA---GTTGGG-AGAC-CAG-CC-T--GGGTGA-C-ATA-G-TGTG-A---C-CT-AGTCTCT--------------------------------
>AluJo_14
--------------------------------------------------GGCCGC--GC---GCAGAGGCTC-ACACC----TG-T-AGT------CC----CAGC-A-C-TT-TGAGAG-GCC----AT---AGC------GG------GCAGATGCC-T-------T--------GAG-C-C----CAGGA---ATTC-C-ACAC-CCA-CC-T--TGGCAA-C-AAA-G-TAAG-A---C-CT-TGTCTCT--------------------------------
>AluJo_15
--------------------------------------------------GGCCAG--GC---ATGGCGGCTC-ATGCC----TG-A-AAT------CC----CAGT-A-C-TT-TGAGAG-GCT----GA---GAT------GA------GAGAATCAC-T-------T--------GAG-C-C----CTGGA---GTTC-C-AGAC-CAA-CA-T--GGGCAA-C-ATA-G-CAAG-A---T-CT-CACCTTT--------------------------------
>AluJo_16
--------------------------------------------------GGCCTGG-AC---ACAGTCACTC-ATGCC----AG-T-AAT------CC----CAGC-A-C-TT-TAGGAA-GCT----GA---GGC------AG------GAGGATCCC-A-------T--------AAG-C-C----CAGCA---GTTT-G-AGAC-CAG-CT-G--GAGCAA-C-ACA-G-CGAA-A---C-CC-TGTCTC---------------------------------
>AluJo_17
--------------------------------------------------GGCCTGG-TC---ACAATCACTC-ATGCC----AG-T-AAT------CC----TGGC-A-C-TT-TAGGAG-GCC----AA---GGC------AG------GAGAATCCC-A-------T--------GTG-C-C----CAGCA---GTTT-C-AGAC-CAG-CT-G--GGGCAA-C-ACA-G-CGAA-A---C-CC-TGTCTC---------------------------------
>AluJo_18
--------------------------------------------------GGCCTGG-TC---ACAATCACTC-ATGCC----AG-T-AAT------CC----TGGC-A-C-TT-TAGGAG-GCC----AA---GGC------AG------GAGAATCCC-A-------T--------GTG-C-C----CAGCA---GTTT-C-AGAC-CAG-CT-G--GGGCAA-C-ACA-G-CGAA-A---C-CC-TGTCTC---------------------------------
>AluJo_19
---------------------------------------------------GCCAG--GA---ACAGTGGTTC-CCACC----TG-T-AAT------CT-------------TT--------GCC----CA---GGT------GG------GAGGATTGC-T-------T--------GAG-C-C----TACAA---GTTT-G-AGAC-TAG-CT-T--GGGCAA-T-ATA-G-TGAG-A---CGCC-AATCTCTATCTTTAAAAAA--------------------
>AluJo_20
--------------------------------------------------------------------GGCTC-ATGCC----TG-T-AAT------CC----CATC-A-C-CT-TGGAAG-GCC----CA---GAC------GA------GAAGATCAC-T-------T--------GGA-C-C----TAGGG---GTTT-G-AGAC-CAG-CC-T--AGGTGA-C-AAA-G-TGAG-A---C-CC-TGTCTCTACAAAATAACAAT-------------------
>AluJo_21
--------------------------------------------------GGCCTG--GC---GTGGTGCCTC-CCCCT----TG-T-GAT------CC----CAGG-A-C-TT-TGGAAG-GCA----GA---GTG------CG------GCAGATCGC-T-------T--------GAG-C-C----TAGGA---GTTC-C-AGAC-C-G-CC-T--GGGCAA-C-ATG-G-TGAA-A---C-CC-GGTCTCTG-------------------------------
>AluJo_22
--------------------------------------------------GGCCTG--GC---GTGGTGCCTC-CCCCT----TG-T-GAT------CC----CAGG-A-C-TT-TGGAAG-GCA----GA---GTG------CG------GCAGATCGC-T-------T--------GAG-C-C----TAGGA---GTTC-C-AGAC-C-G-CC-T--GGGCAA-C-ATG-G-TGAA-A---C-CC-GGTCTCTG-------------------------------
>AluJo_23
--------------------------------------------------GGCTGG--AT---GTGGTGGCTC-ACTCC----TG-T-CAT------CC----TAAC-A-C-TT-TGGAAG-GCC----AA---AGT------AA------GAAGAACAC-T-------T--------GAA-T-C----CAGGG---GTTT-G-AGAC-CAG-CC-T--GGGCAA-G-GTA-G-TATG-A---C-CT-TATCTCT--------------------------------
>AluJo_24
--------------------------------------------------GGCCGG--GC---GCGGCAGCTC-ACGTC----TG-T-AAT------CC----TAGC-A-C-TT-TGGGAG-CCT----AA---GGC------AG------GCTGATTGT-T-------T--------GAG-C-C----CAGTA---GTTC-G-AGAC-CCG-CC-T--GGGCAA-T-GTA-G-CAAT-C---C-CC-CATCTCT--------------------------------
>AluJo_25
--------------------------------------------------GACTGG--GC------ATAACTC-AGGCC----AG-T-AAT------TC----CAGC-A-C-TT-TGGAAG-GCT----AA---AGT------GG------GAGGATCAC---------T------------C------GAGGA---GCTT-G-AGAC-TAG-CC-T--GGTCAA-C-ATA-A-TGAG-A-----CCCCATCTTTACAAAAAA------------------------
>AluJo_26
---------------------------------------------------GCTAA--GC---ATAATGGCTT-ACGCC----TG-T-AAT------CC----CAAC-A-A-TT-TGAGAG-GCT----GA---GGC------CA------GAGAATCAC-T-------T--------GGG-C-T----GAGGA---GTTT-G-AGAC-CAG-CC-T--GGGTAA-C-ATG-G-TGAG-A---C-CC-TATCTGTA-------------------------------
>AluJo_27
--------------------------------------------------GGCTAG--TC---CTGGTGGTTC-ACACC----TG-T-AAT------CC----CAGC-A-C-TT-TAGGAG-GCC----AA---GAT------GG------GAGGATCGC-G-------T--------GAG-C-C----CAAAA---GTTC-A-AGAT-CCA-CC-T--GGGTAA-C-AAA-G-TGAG-A---CCTC-CGACTC---------------------------------
>AluJo_28
------------------------------------------------------GG--GC---TCCGTGGGTC-ACTTC----TG-T-AAT------CT----CAGC-A-C-TTTTGGCAG------------------------------GAGGATCAC-T-------T--------GAG-C-C----TTGGT---GCTC-A-AGAC-CAG-CC-T--GGATAA-C-ACA-G-TGAA-A---T-CC-CCTCTCTACAAAAAATAAAA-------------------
>AluJo_29
---------------------------------------------------GCTGG--GT---GTGGCGGCTC-ATGCC----TG-T-AAT------CT----CAGC-A-C-TT-TGGGAG-ATT----GA---GAC------AG------AAAGCTTGC-T-------T--------GAA-T-T----CAGGA---GTTC-A-AGAC-CAG-CC-T--GGACAA-T-ATA-G-GGAG-A---C-CT-CGTCTCTA-------------------------------
>AluJo_30
---------------------------------------------------GCCAG--GT---GCAATAGTTC-ATGCT----TG-T-AAT------CC----CAGC-A-T-TC-TGGGAA-GCC----TA---GGT------AG------GAGGATTGC-C-------G--------GAG-C-C----CAGGA---GATC-G-AGAC-CAG-TC-T--GGGCAA-C-ATA-G-TAAG-T---C-CC-TGTCTGTA-------------------------------
>AluJo_31
---------------------------------------------------GCTGG--GC---ACAGTGGCCC-ACACC----TG-C-AAT------CC----CAGC-A-C-TT-TGGGAG-GCC----AA---GAA------TG------GAGGATTGT-T-------T--------GAG-C-C----CGAGT---TTCC-A-ATAC-CAG-CC-T--GGGCAA-C-ATA-G-CAAG-G---C-CC-CCACTCTA-------------------------------
>AluJo_32
--------------------------------------------------GGCCGG--GC---ACCAGAGCTC-ACACC----TT-T-AAT------TC----CAGT-A-T-TT-TGGGAG-GCC----GA---GGC------GG------GAAGATTGC-T-------T--------GAT-C-C----CAGGC---ATTC-G-AGAC-TAG-CC-T--GGGCAA-C-AAA-G-CGAG-A---C-CT-CATCTCT--------------------------------
>AluJo_33
---------------------------------------------------GCCTG--GC---ATGTTGGCTC-ATGCC----T--T-AAT------CC----CAGC-A-C-TT-TGGGAG-CCC----AA---GGT------AG------GAGAATTGC-T-------T--------GAT-C-C----CAGGA---GTTT-G-AAAT-CAG-CC-T--GGGCAA-T-GTA-G-CAAG-A---C-CT-TGCCTCTAC------------------------------
>AluJo_34
---------------------------------------------------GCCGG--GC---ATGGTGGCTG-ATGCA----TG-T-AAT------CC----CAGT-A-C-TT-TGGGAG-GTC----AA---GGC------AG------TTGGATCGC-T-------T--------AAA---C----CAGGA---GTTCTG-AGAC-CAG-CC-T--GGGCAA-C-ACA-G-AGAA-A---C-CC-CGTTTTTA-------------------------------
>AluJo_35
--------------------------------------------------GGCTGG--GC---GCGGGACCTC-ACGCC----TG-T-AAT------TC----TACC-A-C-TT-TGAGAG-GCC----AA---GAT------GG------GAGGACTGC-T-------T--------GAG-C-A----CAGGA---GTTC-A-AGAC-CAG-CC-T--GGTCAA-T-ATA-G-CAAG-A---C-CT-CATCTCT--------------------------------
>AluJo_36
---------------------------------------------------GCCAA--GC---GCAGTGGCTC-ACACT----GG-T-AAT------CC----TAGC-A-C-TT-TGGAAG-GCC----AA---GGT------CG------GAGGATCAC-T-------T--------GAA-C-C----TGGGA---GTGT-G-AGAC-TAG-CC-T--GGGCAA-C-ATA-G-TGGA-A---C-CC-CACCTCTA-------------------------------
>AluJo_37
--------------------------------------------------GACCAG--GA---GTGATGGCTC-A-GCC----TG-T-AAT------TC----TGGA-A-T-TT-CGGGAG-GCC----GA---GGC------AG------GAAGATTCC-T-------T--------GAG-C-A----CAGGA---GTTC-C-AGAC-CAG-CC-T--GGGCAA-T-GTA-G-CAAG-A---C-GC-TGTCTCTA-------------------------------
>AluJo_38
---------------------------------------------------GCCGG--GC---GTGGTGGTTC-ACGCC----TG-T-AAT------CC----CAGA-A-C-TT-TGGACC-ACA----GA---GGT------GG------GAGGATTGC-T-------T--------GAG-C-C----CAGGA---GTTT-G-AGAC-CAG-CC-T--GGGCAA-C-TCA-A-CGGG-A---C-AT-AGTCTCTA-------------------------------
>AluJo_39
---------------------------------------------------GCCAG--GC---ACAGTGGCTT-GCACC----TG-T-AAT------CC----CAGC-A-C-TT-TGGGAG-GCC----CG---GGT------GG------GAGTATTGT-T-------T--------AAG-C-C----TAGGA---GTTT-G-AGAC-CTA-CC-T--GGGCAA-C-ACA-G-CAAG-A---C-TC-CATTTCTA-------------------------------
>AluJo_40
--------------------------------------------------GACTGG--GT---GCGGTGGCTC-ACACT----TC-T-AAC------CC----CAGC-A-C-TT-TGGGAG-GCC----AG---GGT------GG------GAGGATCAC-T-------T--------GAG-T-C----CAGGA---GTTT-G-AGAG-CAG-CC-T--GGACAA-C-AGA-G-CAAA-A---TCCC-CTTCTC---------------------------------
>AluJo_41
--------------------------------------------------GGCCA---GC---ACCGTAGCTC-ACGCC----TG-C-GAT------CC----CAGC-A-C-TT-TGGGAG-GCC----AA---GGC------AT------AAAGATTGC-T-------T--------GAA-C-C----CGGGA---GTTC-G-AGAC-CAG-CC-T--GGAGAA-C-ATT-G-TGAG-A---CCAC-CGTCTTT--------------------------------
>AluJo_42
--------------------------------------------------GGCCA---GG---GTGGTGGCAC-AAGCC----TG-T-AGT------TC----CAGC-A-C-TT-TGGAAG-GCC----AA---GGT------GG------ATGGATCGC-T-------T--------GAG-C-C----AAGGA---GTTG-G-AGAC-CAG-CA-T--GGGTAA-C-ATG-G-CAAA-A---C-CT-CATCTCTA-------------------------------
>AluJo_43
--------------------------------------------------GGCCAG--GC---TAGGTGGCTC-ACGCC----TA-T-AAT------AT----CAAC-A-C-TT-TGGGAG-GCC----TG---GGC------GG------AAAGATCAC-T-------T-------TGAG-C-T----CAGGC---ATTC-C-AAAC-CAG-CA-T--GGGCAA-C-ATG-G-TGAG-A---C-CC-CGTCTC---------------------------------
>AluJo_44
--------------------------------------------------GGTTGG--GC---GTGGTGGCTC-ACGCC----TG-T-CGT------CC----CAGC-A-C-TT-TGGGAG-GCC----GG---GAT------GG------GAAGATCGC-----------------------------CAGGA---CTTT-G-TGAC-CTG-CC-T--GGGCAA-G-ATA-G-CAAG-A---CCCCATGTCTTCGAAAA---------------------------
>AluJo_45
---------------------------------------------------GCCAT--GC---CCAGTGGCTC-ACACC----AG-T-AAT------CT----CAGC-C-C-TT-CGGGAG-GTT----GA---GGC------AA------GAGGATTGC-T-------T--------GAG-C-C----CAGGA---GTTT-G-AAAC-CAG-CC-T--GAGCAA-C-ATA-G-TGAG-A---C-TC-TGTCTCTA-------------------------------
>AluJo_46
--------------------------------------------------GGCCGG--GC---ATGGTGCCTC-ATGTC----TG-C-AAT------CC----TAGC-A-C-TT-TGGGAG-GCC----GA---GGC------AG------GAGGATTGC-T-------T--------GAA-C-A----CAGGA---ATTC-A-AAAC-CAG-AC-T--GGTCAA-T-GTA-G-CGAG-A---C-CT-CATCTCT--------------------------------
>AluJo_47
----------------------------------------------------CTGG--GC---ATGGTGGCTC-ATGCC----TG-T-AAT------CC----CAAC-A-C-TT-CGGGAG-GCT----GA---GAT------GG------GAGGGTAAC-T-------T--------GAG-C-C----CAGGG---CTTT-A-AGAC-CAG-CC-T--GGGAAA-C---A-G-CAAT-A---C-CT-CGTGTCTGCTA----------------------------
>AluJo_48
-------------------------------------------------------------------TGGCTC-ATGTC----CA-T-AAT------TT----GAGC-A-C-TT-TAGAAG-GCC----AA---AAT------GG------GAGGATTGC-T-------T--------GAG-C-C----CAAAA---GTTC-A-AGAC-CAG-CC-T--GGGCAA-C-ATG-A-CAAG-A-----CC-CCTTTCTACAAAAAAAATAA-------------------
>AluJo_49
-------------------------------------------------------------------TGGCTC-ACCCC----TG-T-AAT------CT----CAGC-A-C-TT-TGAAAG-GCC----GA---GAC------AG------GAGGATTGC-T-------T--------GAG-C-C----CAGAA---CTTC-G-CAAC-CAG-TG-T--GGTCAA-C-ATG-A-CAAG-A---C-CC-TGTCTCTACAAAAACAAAA--------------------
>AluJo_50
---------------------------------------------------GCCCG--GC---ATGGTGGCTG-ATGCC----TG-T-AAT------CC----CAGC-A-C-TA-TGGGAG-GCC----AA---AGC------AG------GAAGCTCAC-T-------T--------GAG-CAC----CAGGA---ATTG-G-AGAC-CAG-CC-T--GAGCAA-A-ATA-G-CGAG-A---C-CC-TCTTTCT--------------------------------
>AluJo_51
---------------------------------------------------GCCAA--GC---ACAGTGGCTC-ACATC----TG-T-AAT------CC----TAGT-A-C-TT-TGGGAG-GCC----AA---AAT------GG------GAGGATCAC-T-------T--------GAG-C-C----TGGTA---GTTT-G-AGAC-CAA-TC-T--GGGCAA-C-AGA-G-CGAG-A---C-CC-CATCTCTA-------------------------------
>AluJo_52
--------------------------------------------------GGCTGT--GT---ACAGTGGGTC-ACACC----TG-T-AAT------CC----TAGC-A-C-TT-TGGGAG--TC----AA---GGC------AG------GAAGATCGC-T-------T--------GAG-C-C----CAGGA---ATTT-G-AGAG-AAG-CC-T--GGGCAA-T-ATA-G-TGAG-A---C-CC-TTTCTTTA-------------------------------
>AluJo_53
--------------------------------------------------GACTGG--GT---GTGGCAGTTC-ACACT----TG-T-AAA------CC----CAGC-C-C-TT-TGGGAG-GCC----AA---GGC------GG------GAGGCTGGC-T-------T--------GAG-C-T----TAGA----GTTT-G-AGAC-CAG-CC-T--GGGCAA-C-ATA-G-CAAG-A---T-CC-CATCTCTA-------------------------------
>AluJo_54
--------------------------------------------------GGCTGG--GC---AAGGTGGTTC-ACACC----TG-T-AAT------CC----CAGC-A-C-CT-TGAGAG-GCT----GA---GGT------GA------GAGGACTGC-T-------T--------AAG-C-C----CAGAA---GTTC-G-AGAC-CGG-CC----TGGTAA-C-AAA-G-CAAG-A---C-TC-CATCTCTA-------------------------------
>AluJo_55
--------------------------------------------------GGACAG--GC---ATGCTGATTC-ATGCC----TG-T-AAT------CC----CAGC-A-G-TT-TGGGAA-ACC----AA---AGT------AG------GAAGATCAC-T-------T--------GAG-C-C----CAGGA---GTTT-G-AGGC-CAG-AC-T--GGGCAA-C-CCA-G-CAAG-A---C-CC-CATCTCT--------------------------------
>AluJo_56
--------------------------------------------------GGCCAA--AC---ACGGTGGCTC-ACACC----TG-A-AAT------TC----CAGC-A-T-TT-TGGTGGGGCT----GA---GGC------AG------GAGGATCCC-T-------T--------GAG-C-C----CAGGA---GTTC-A-AAAT-CAG-CC-T--GGGCAA-C-GTA-G-GGAG-A---C-TC-TGCCTC---------------------------------
>AluJo_57
--------------------------------------------------GGCCAT--GA---ACAGTGACTC-ACGCC----TG-T-AAT------CA----CAGC-A-T-TT-TGGAAG-GCC----AA---GGT------TG------GAGGATAGC-T-------T--------GAG-C-C----CAGGA---ATTC-G-AGAC-CAG-CC-A--GGGCAA-C-ATG-G-CAAG-A-----CC-TATCTCTA-------------------------------
>AluJo_58
--------------------------------------------------GGCCTG--GC---ACAGTGGCTC-ACGCC----TG-T-AAT------CC----CAGC-A-A-TT-TGGGAG-ACC----GA---GGC------GG------ATAAATCGC-T-------T--------GAG-C-C----TAGGA---GTTG-A-AGAC-CAG-CC-T--GGGCAA-C-ATG-G-CGAA-A---C-CT-CATGTCT--------------------------------
>AluJo_59
--------------------------------------------------GGCTGA--GT---GCAGTGGCTC-ACACA----TG-T-AAT------CC----CAAC-A-C-TT-TGGGAG-ATC----AA---GAT------AG------GGGGATCAC-T-------T--------GAG-C-C----CAGGA---GTTT-G-AAAC-CAG-AC-T--GGGCAA-C-ATA-A-TGAG-A---C-AC-TGTCTCT--------------------------------
>AluJo_60
--------------------------------------------------GGCCGG--AC---ATGGTGGCTC-ATGTC----TG-T-AAG------CC----TAGC-A-C-TT-TGGGAG-GCT----GA---GAT------GG------GTGGATTGC-T-------T--------GAG-C-C----TGGGA---TTTC-G-AGAC-CAG-CC-T--GGGAAA-C-ATG-G-TGAA-A---C-CC-TGTCTCT--------------------------------
>AluJo_61
--------------------------------------------------GGCTGG--GC---ACGTTTGCTC-ATGCC----CA-T-AAT------CC----CAAC---C-CC-TTGGAG-GCC----GA---GGC------AG------GAGGATCAG-T-------T--------GAG-T-C----CAGGA---GCTT-G-AGAC-CAT-CC-T--GGGCCA-C-ATA-G-TGAG-A-----CCCTGTCTCTA-------------------------------
>AluJo_62
--------------------------------------------------GGCCAG--GC---ACTGTGACTC-AAGCT----TA-T-AAT-------C----CAGC-A-C-TT-TGGGAG-GCT----GA---GGC------AG------GAGGATCCT-T-------T--------GAG-C-G----CAGGA---GTTA-G-AGAC-CAG-AC-T--GGGCAA-T-ATG-G-CAAG-A---C-CC-CATCTCTA-------------------------------
>AluJo_63
-----------------------------------------------------------------GGTGGCTC-ACATT----TG-T-AAT------CC----TAGC-A-C-TT-TGGGAG-GCC----AA---GAC------AG------GAGGATCGC-T-------T--------AAG-T-C----CAGGA---ATTC-A-AGAC-CAG-CC-T--GGGCAA-T-GTA-G-CAAA-G---C-CC-CATCTTTATATAAAATA----------------------
>AluJo_64
---------------------------------------------------GCTGG--GC---ATGGGGGCTT-ACATC----TG-T-AAT------CC----CAGC-A-C-TT-TGGGAG-GTG----GA---AGT------GG------GTGGATCAC-T-------T--------GAG-T-C----CAGGT---GTTT-A-AGAC-CAG-CC-T--GGGCAG-C-ATA-G-TGAG-A---C-TT-TGTCTCTA-------------------------------
>AluJo_65
--------------------------------------------------GGCCGA--GC---ATGTTGGCTC-ATGCC----TG-T-AAC------CC----CAGC-A-C-TT-TGGGAG-ACC----GA---AGT------AG------GCAGATCAC-T-------T--------GAG-C-C----CAGGA---GTTT-G-AGAT-CAG-CC-T--GAGCAA-C-ATA-A-CAAG-A---C-CC-CATCTCT--------------------------------
>AluJo_66
--------------------------------------------------GGCTGG--GC---GTGATGATTC-ATGCC----TGTT---T------CC----TAGC-T-C-TT-TGGGAG-GCC----GA---GGC------AT------GAGGATTGC-T-------T--------CAG-C-T----CAGTA---GTTC-G-AGAC-CAG-CC-T--GGGCAA-C-ATA-G-TGAG-A-----CTCTGTCTCTA-------------------------------
>AluJo_67
--------------------------------------------------GGCCAG--GC---ATGTTGGATC-ACGCC----TG-T-AAT------CC----CAGC-A-G-TC-TAGGAG-GCC----GA---GAT------GG------GAAGACTGC-T-------T--------GAG-C-C----CAGGA---GTTC-G-AGAC-CAA-CC-T--GGGCAA-C-ATA-G-CTAG-------CCCCATCTCTA-------------------------------
>AluJo_68
--------------------------------------------------GGCCGA--GT---GTAGTCACTC-ACACC----TA-T-AAT------CC----CAGC-A-C-TT-TGGGAG-GCC----TA---GGC------TG------GAGGAATGC-T-------T--------GAG-C-T----C-GGA---GTTC-A-AGGC-CCG-CC-T--GGGCAA-CAATA-G-TGAG-A---T-CT-TGTCTCT--------------------------------
>AluJo_69
--------------------------------------------------GACCAG--GT---ACAATGGCTC-ACACC----TA-T-AAT------CC----CAGC-A-C-TT-TGGGAA-GCT----GAA--GGC------AG------AAGGATCTC-T-------T--------GAA-C-C----CAGGA---GTTT-G-ACAC-CAC-CC-T--GGGCAG-C-AGA-G-TGAG-A----TCC-TATCTC---------------------------------
>AluJo_70
--------------------------------------------------GGCTGG--GC---GAGGTGGCGC-ACACC----TG-C-AGT------CC----CAGT-A-C-TT-TGGAAG-GCT----GG---GGT------GG------GAGGATCGC-T-------T--------GAG-C-C----CGGGA---GTTC-A-AGAC-CGG-AC----TGGCAA-C-ATA-G-TGAG-A---C-TC-CATCTCTA-------------------------------
>AluJo_71
--------------------------------------------------GGCTGG--GC---TTGGTGGCTC-ACACC----TG-T-AAT------CT----CCAC-A-T-AT-TGGGAG-GCC----AA---GGC------AG------GCAGATGGC-T-------T--------GAG-C-C----CAGGA---GTTT-G-AGAC-CAG-CC-T--GGGCAG-C-ATA-G-TGAG-A---C-CT-TGTCTCT--------------------------------
>AluJo_72
--------------------------------------------------GGCCAG--GC---ACAGTGGATC-GCTCC----TT-G-AAT------CT----CAGC-A-C-TT-TGGGAG-GCC----GA---GGC------AG------GAGGATCAC-T-------T--------AAG-C-C----TAGGA---GTTG-G-AGAC-TGG-CC-T--GGGCAA-C-AAA-G-TGAG-A---CCCC-CGTCTC---------------------------------
>AluJo_73
--------------------------------------------------GGCCAG--GC---GTAGTGGCTC-ACACC----TT-T-CAT------CC----CAGC-A-C-TC-TGGGAG-GCC----AA---GAC------CG------GAGGATCAC-T-------T--------GAA-C-T----CAGGA---GTTC-G-AGAC-CAG-CC-T--GGGCAA-C-AAA-A-TGAGAA---C-CC-CCTCCC---------------------------------
>AluJo_74
--------------------------------------------------GGCTGG--GT---GTGGTAGCTC-ATGCC----TG-T-AAT------CC----TAGC-A-G-TT-GGGGAG-GCC----AG---GGT------GG------GAGGATCAC-T-------G--------GAG-T-C----TTGGA---GTTC-A-AGAC-CAG-CC-T--GGGCAA-C-ACA-G-GGAG-A---C-CC-CATTTCT--------------------------------
>AluJo_75
--------------------------------------------------GGCTGG--GT---GCGATGGCTC-ATGCC----TG-T-AAT------CC----TAGC-A-C-TT-TGGAAA-GCC----AG---GGT------GG------GAGGATCAC---------T------------C-------------------A-AGAT-GAG-CC-T--GGGCAA-C-ATA-G-TGAG-A---CCTT-CATCTCTACACACAAACAAA-------------------
>AluJo_76
--------------------------------------------------GGCTGG--GC---ACAGTGGCAC-ACACC----TG-T-AAT------CC----CAGC-A-C-TT-TTGGAG-GCT----GA---GGT------GG------GAAGATGGC-C-------T--------GAG-C-C----CAGGA---GTTT-G-AGAA-CAC-CC-T--AGGCAA-C-ATA-G-CAAG-A---C-CT-TGCCTCT--------------------------------
>AluJo_77
--------------------------------------------------GGTTGG--TC---TCGGTGGCTC-ACAGC----TG-T-CAC------CC----CAGC-A-C-TT-TGGGAG-GCC----AA---GGC------GG------AACAATCGC-T-------T--------GAG-C-T----CAGGA---GTTG-G-AGAC-CAG-CC-T--GGGCAA-C-ATA-G-CGAG-A---C-CC-CATGTCT--------------------------------
>AluJo_78
--------------------------------------------------GGTCAG--GC---ACAGTGGCTC-ATGCC----TA-T-AAT------AC----CAGC-A-C-TT-TGGGAG-GCC----AA---GGC------GG------GAGTATTGC-T-------T--------GAG-C-C----CAGGG---ATTC-A-AGAC-CAG-CC-T--GGACAA-C-ACA-G-AAAG-A---C-AC-CATTTCT--------------------------------
>AluJo_79
--------------------------------------------------GGCTGG--GC---ACAGTAGCTC-ATGCC----TG-T-CAT------CC----CACC-A-C-TT-TGGGAG-GCC----AA---GGC------AG------GAAAACTCC-T-------T--------GAG-C-C----CAGGA---GTTT-G-TGAC-CAG-AC-T--GGGCAA-C-ATA-G-TGAG-A---C-TG-TGTCTCT--------------------------------
>AluJo_80
---------------------------------------------------GCTGG--GG---GCAGTGACTA-ACACC----TG-T-AAT------CC----CAGC-A-C-TT-TGGGAG-GCG----AA---GGT------AG------GAGGATGGT-T-------T--------GAG-T-C----CAGGA---GCTC-G-AGAT-CAG-CC-T--GGACAA-T-ACA-G-CAAG-A---C-CC-TGTCTCTA-------------------------------
>AluJo_81
--------------------------------------------------GGCCAG--GT---GCAGTGTCTC-ATACT----TG-T-AAC------CC----CAAC-A-C-TT-TGTGAG-GCC----AA---GGC------GG------AAGGATCAC-T-------T--------GAG-T-C----CAGGA---GTTT-G-AGAC-CAG-CC-T--GGGCAA-C-ATG-G-CAAG-A---C-CT-CATCTCT--------------------------------
>AluJo_82
--------------------------------------------------GGCCGG--GC---AAAGTAGCTC-ACGCC----TG-T-AAT------CT----CAGC-A-C-TT-TGTGAG-GCA----GA---GGC------AG------GAGGACTGC-T-------T--------GAG-C-C----TAGGA---GTTC-A-AGAC-CAG-CC-T--AGGCAA-T-GTG-G-CGAG-A---C-CC-CGTCTCT--------------------------------
>AluJo_83
--------------------------------------------------GGCCAG--GA---ACAGCAGCTC-ACGCC----TG-T-AAT------CC----CAAC-A-T-GT-TGGGAG-GCT----AA---GGT------GG------GAGGATCGC-T-------T--------GAG-T-C----CCTGA---GTTT-G-AGAC-CAG-CC-T--GAGCAA-C-GTA-G-CAAG-A---C-CC-TGTCTTT--------------------------------
>AluJo_84
---------------------------------------------------GCCAA--GC---ATGGTGGCTC-ATGCC----TG-T-AAT------CA----CTGC-A-C-CC-TAGGAG-GCT----GA---GGC------AA------GAAGATCGC-T-------T--------GAG-C-C----CAGGA---GTTC-A-AGAC-CAA-CC-T--AGGCAA-C-ATA-G-TGAG-A---C-CC-TGTCTCTA-------------------------------
>AluJo_85
--------------------------------------------------GGCTGG--GC---ATGGTGGCTA-GGGCC----TA-T-AAT------CG----CAGC-A-C-TT-TGGGAG-GCT----GA---GGC------GG------GAGGACTGC-T-------T--------GAG-T-C----CAGGA---GTAT-G-AGAC-TAG-CC-T--GGGCAA-C-ATG-G-CGAG-T---C-TC-CATCTCT--------------------------------
>AluJo_86
--------------------------------------------------GGCCAG--GC---ATGGTGGCTC-CTGCC----TA-T-AAT------TC----CAGC-A-C-TT-TGGGAG-GCT----GA---GGT------AG------GAGGATCGC-T-------G--------GAG-C-C----CAGGA---GTTG-A-AGAC-AAG-CC-T--GGGTAA-C-CTA-G-TGAG-A---C-TC-CATCCCT--------------------------------
>AluJo_87
--------------------------------------------------GGCCAG--GC---ACAGTGGCTC-ATGCC----TG-T-AAT------CC----CAGC-G-C-TT-TGGGAT-GCC----GA---GGA------AA------GAGGACCAC-T-------T--------GAG-C-C----CAGGA---GTTT-G-CGAC-CAG-AA-T--GGGCAA-C-ACA-G-GGAG-A---C-CT-CATCTCT--------------------------------
>AluJo_88
--------------------------------------------------GGCCAG--GC---ACAGTGGCTC-ATGCC----TG-T-AAT------CC----CAGC-A-C-TT-TGGGAA-GCC----AA---AGC------AG------GAGGGTCAC-C-------T--------GAG-C-C----CAGGA---GTTT-G-AGAC-CAG-CT-T--GCGAAA-C-ACA-G-CAAA-A---C-CT-CATCTCT--------------------------------
>AluJo_89
--------------------------------------------------GGTCGG--GC---ACAGTGGCTC-ACGCC----TG-T-AAT------CC----CAGC-A-C-TT-TGGCAGGCCC----CA---GGC------AG------GAGGATTAC-T-------T--------GAA-C-T----CAGGA---GTTT-G-AGAC-CAG-CC-T--GGGCAA-C-ATA-A-CAAG-A---C-CC---TCTCCA-------------------------------
>AluJo_90
--------------------------------------------------GACCGG--CC---ACTGCGGCTC-ATGCC----TG-A-AAT------CC----CAGC-A-C-TT-TGGGAG-GTC----TA---GGT------GG------GAGGATCAC-T-------T--------GAG-C-C----CAGGA---GTTT-G--GAC-CAG-CC-T--GGGGAA-C-ATA-T-AGAG-A---A-CT-TGTTTCTA-------------------------------
>AluJo_91
--------------------------------------------------GGCCGG--GC---ACAGTGGTGC-ATCCC----TG-T-AAT------CC----TAGC-A-C-TT-TGGGAG-GCC----AA---GGC------AG------GAGGATCAC-T-------T--------GAG-C-T----CAGGG---GTTC-A-AGAC-CAG-CC-C--AGGCAA-C-ATG-G-CAAA-A---T-GC-CATCTCT--------------------------------
>AluJo_92
--------------------------------------------------GGCCGG--GC---ACAGTGGCTC-ACACG----TG-T-AAC------CC----CAGC-A-T-TC-TGGGAG-TCC----AA---GAC------AG------GAGGATCAC-T-------T--------GAG-T-C----TAGGA---GTTG-G-AGAC-CAG-CC-T--GGGCAA-C-ATG-G--GAG-A---C-CT-CCTATCTA-------------------------------
>AluJo_93
--------------------------------------------------GGCTGG--GC---ACGGTGGCTC-ACGCC----TG-T-AAT------CC----TGGC-A-C-TTGTGGGAG-GCT----TA---GGT------GG------GAGGACTGC-T-------T--------GAG-C-C----CAGGA---GTTC-A---AC-CAG-CC-T--GGACAA-C-ATA-G-CAAG-A---C-CC-CGTCTTTA-------------------------------
>AluJo_94
--------------------------------------------------GGCTGG--GC---ATGGTGGCTC-CTACC----TA-T-AAT------CC----CAGC-A-C-TT-TCGGGG--CT----GA---GGC------GA------GGGGATCAC-T-------T--------GAG-C-C----CAGGC---ATTT-A-AGAC-CAG-CC-T--GGGCAA-C-ATA-G-CAAG-A---C-TC-CATCTCTA-------------------------------
>AluJo_95
--------------------------------------------------GGCTGG--GC---ACAGTGGCTC-ACATC----TG-T-AAT------CC----CAAC-A-C-TT-TGAGAG-GGC----AA---GGC------AG------GAGAATCAC-T-------T--------GAG-C-C----CAGGA---GTTT-G-AGAC-CAG-CC-T--GGGTGA-C-AAA-G-TTAG-A---C-CC-AATTTCT--------------------------------
>AluJo_96
--------------------------------------------------GGCCAG--GT---TTTGTGGCTC-AAGCC----TG-T-AAT------CT----CAGC-A-C-TT-TGGGAG-GCC----AA---GCA------GG------GAGGACTGC-T-------T--------GAA-C-C----CAGGA---GTTT-G-AGAC-CAG-CC-T--GGGTGA-C-GTG-G-CAAG-A---C-CC-TATCTCT--------------------------------
>AluJo_97
--------------------------------------------------GACTGG--GC---CCAGTGGCTC-ACACC----TG-T-AAT------CC----CAGC-A-C-TT-TCGGAG-GCC----GA---GGT------AG------GAGGATAGT-T-------T--------GAG-C-C----CAGAA---GTTT-G-AGAC-CAG-CC-T--GGGCAA-T-GTA-G-CAAG-A---C-CT-CGTCTCT--------------------------------
>AluJo_98
---------------------------------------------------GCCAG--GC---ACAGTGGCCC-ATGCC----TG-T-AAT------CC----CGGC-A-C-TT-TTGGAG-GCA----AA---ATT------GG------GAGGATCAC-T-------T--------GAG-C-C----CAGGA---GTTC-A-AGAC-AAG-CA-T--GGGCAA-C-ATA-G-TGAG-A---C-TC-CATCTCTA-------------------------------
>AluJo_99
--------------------------------------------------GGCTGG--GC---ATGGTGGTTC-ACACC----TG-T-AAT------CC----CAAC-A-T-TG-TGGGAG-ACC----AA---GGC------GG------GAAGACTGT-T-------T--------GAG-C-C----CAGA----GTTC-A-AGAC-CAG-CC-T--GATCAA-T-ATA-G-CAAG-A---C-CT-CATCTCTA-------------------------------
>AluJo_100
--------------------------------------------------GGCTGG--GC---ATGGTGGTTG-ATACC----TG-T-AAT------CC----CAAC-A-C-TG-TGGGAG-ACC----AA---GGC------GG------GAAGACTGC-T-------T--------GAG-C------CCGGA---GTTC-A-AGGC-CAG-CC-T--GGGCAA-T-ATA-G-CAAG-A-----CCTCATCTCTA-------------------------------
>AluJo_101
--------------------------------------------------GGCTGG--GC---ACCATGGCTC-AAACC----TG-T-AAT------CC----CAGC-A-C-TT-CAGGAG-GCC----AA---GGC------AG------GCAGACTGC-T-------T--------GAG-C-C----CAGGA---GTTT-G-GGAC-CAG-CC-T--GGGCAA-C-ATG-G-TGAA-A---C-TC-TGTCTCT--------------------------------
>AluJo_102
--------------------------------------------------GGTCGG--GT---GCGATGGCTC-ATGCC----TG-T-AAT------CC----CAGC-A-C-TT-TGGGAA-GAT----GA---AGC------AG------GAGGATTGC-T-------T--------GAG-T-C----CAGGA---GTTC-A-GGAC-CAG-CT-T--GGGCAA-C-ATA-G-GGAG-A---C-CC-TTTTTCT--------------------------------
>AluJo_103
---------------------------------------------------GCCAG--GC---ATAGCAGCTC-ATCCC----TG-T-AAT------CC----CAGC-A-A-TT-TGGGAG-GCT----GA---GGC------AG------GAGGATCGC-T-------T--------GAG-C-C----CAGGA---GTTT-G-AGAC-TAG-CC-C--GGGCAA-C-ATA-G-TGTG-A---T-TC-CATCTCTA-------------------------------
>AluJo_104
---------------------------------------------------GCTGG--GT---GTGGTGGCTC-ATACC----TG-T-AAT------CC----CAAC-A-C-TT-TGGGAG-GTC----AG---GGT------AG------GAGGATCAC-T-------T--------GAG-C-C----CAGAA---GTTC-A-AGAC-TGG-CC-T--GGGTAA-C-ACA-G-CAAG-A---C-CC-TATCTCTA-------------------------------
>AluJo_105
---------------------------------------------------GCCGG--TC---ACTGTGGTTC-ACACC----TG-T-AAT------CC----TAGG-A-C-TT-TGGGAG-GCT----GA---GGT------CG------GAGGACTGC-T-------T--------GAG-C-C----CAGGA---GTTC-G-AGAC-CAG-CC-T--GGGCAA-G-ATG-G-TGAG-A---T-CC-CATCTCTA-------------------------------
>AluJo_106
--------------------------------------------------GGCTAA--GT---GTGGTGGCTC-ACACC----TA-T-AAT------TC----CACC-A-C-TT-TGGGAG-GCT----GA---GAT-------G------AAGGATCCC-T-------T--------GAG-C-C----CAGGA---GTTT-G-AGAA-CAG-CC-T--GGGCAA-C-ATG-G-TGAG-A---C-CT-TGTCTTTA-------------------------------
>AluJo_107
--------------------------------------------------GGCTGG--GT---GCGGTGG-TC-AGCCC----TA-T-AAT------CC----CATC-A-C-TT-TGTGGG-GCC----AA---GGA------GG------GAGGATCAC-T-------T--------GAG-C-C----CAGGA---GTTT-G-AGAC-CAC-CC-T--GGTCAA-A-ATA-G-CAAG-A---C-CC-TGTCTCTA-------------------------------
>AluJo_108
---------------------------------------------------GCCAG--GT---ATGGTGACTC-AAGCC----TG-T-AAT------CT----CGGC-A-C-TT-TAGGAG-GCC----GA---GGC------AG------GAGGATCGC-T-------T--------GAG-T-C----CAGGA---GTTC-A-AGAC-CAG-CC-T--GAGCAA-A-ATA-G-TGAG-A---T-CC-TGTCTCTA-------------------------------
>AluJo_109
--------------------------------------------------GGCCCG--GC---ACAGTGGCTC-ACTCC----TG-T-AAT------CT----CAGT-A-C-TT-TGGGAG-GCT----GC---GGC------GG------GAGGATCAT-T-------T--------GAG-C-C----CACGA---GTTC-G-AGAC-CAG-CC-T--GGGCAG-C--TA-G-TCAG-A---C-TT-TGTCTCTA-------------------------------
>AluJo_110
--------------------------------------------------GGCCAG--GC---ACAGTGGCTC-ATACC----TG-T-AAT------CC----CAAA-A-C-TT-TTGGAA-GCC----AA---GGA------GG------GAGCATTGC-T-------T--------GAG-C-C----CAAGA---GTTG-G-AGAC-CAG-CT----TGGCAA-C-ATA-G-TGAG-A---C-TC-TGTCTCTA-------------------------------
>AluJo_111
--------------------------------------------------GGCCAG----------GTGG----ACACC----TG-T-AAT------CC----TAGC-A-T-TT-TAGGAT-GCC----AA---GAC------CG------ACAGATAGC-T-------T--------GAG-C-C----CAGGA---GTTT-G-AGAC-CAG-CC-T--GGGCAA-T-ATA-G-CGAG-A---C-CC-CATCTCTATAAAAAA------------------------
>AluJo_112
---------------------------------------------------------------GTGGTGGTTC-ATGTC----CG-T-AAT------CC----CAGC-A-C-TT-TGTGAG-GCC----GA---GGC------AG------GAGAATCAC-T-------T--------GAG-C-T----CAGGG---GTTC-A-AGAC-CAG-CC-T--GGGCAA-C-ACA-G-GGAG-C---T-CC-TGTCTCTAAAAAAAA------------------------
>AluJo_113
---------------------------------------------------GCTGG--GC---TCAGGGACTC-ATGCC----TG-T-AAT------CA----CAAC-A-T-AT-TGGGAG-GCC----GA---GGT------GG------GAGAATCAT-T-------T--------GAG-C-C----CAGGA---GTTT-G-AGAC-CAG-CC-T--GGGCAA-C-ATA-G-CAAG-A---C-CC-CATCTCTA-------------------------------
>AluJo_114
--------------------------------------------------GGCCAG--GC---GTGGCGGTTT-ACACT----AG-T-AAT------CT----GAGC-A-C-TT-TGGGAG-GCT----GA---GGC------AG------GAGGATCTC-T-------T--------GAG-T-C----CAGGA---GTTT-G-AGAC-CAG-CC-T--GGGCAA-C-ACA-G-GGAG-A---C-CC-CATCTCT--------------------------------
>AluJo_115
--------------------------------------------------GGCCAC--AT---GAGGTGGTTC-ACGCC----TG-T-AAC------CC----CAGC-A-C-TT-TGGGAG-GCC----AG---GGT------GG------GAGGATCAC-T-------T--------GAA-C-C----CAGGA---GTTC-G-AGAT-CAG-CC-T--GGGCAA-C-ACA-G-TGAG-A---C-TC-TGTCTCT--------------------------------
>AluJo_116
--------------------------------------------------GGCTGG--GC---GTGGTGGCTT-ATGCC----TG-T-AAT------CC----CAAC-A-C-TT-TGGGAG-GCA----GA---GAC------AA------GATGATCGG-T-------T--------CAG-C-C----CAGGA---ATTC-G-AGAC-CAG-CC-T--GGGCAA-C-ATA-G-TGAG-A---C-CT-CATTTCT--------------------------------
>AluJo_117
--------------------------------------------------GGCTGG--GC---CTGGTGGCTC-AGGCC----TG-T-AAT------TC----CAAC-A-C-TT-TGGGAG-GCC----GA---AGC------AG------GAGGACTGC-G-------T--------GAG-C-C----CAGCA---GTTC-A-AGAC-CAG-CC-T--GGACAA-C-ATA-G-TGAG-A---C-TC-TGTCTCT--------------------------------
>AluJo_118
--------------------------------------------------GGCTGG--GC---ACAGTGGCTC-ACGCC----TA-C-AAT------CC----TAGC-A-C-TT-TGGGAA-GCT----GA---GGC------AG------GAGGATCCG-T-------T--------GAA-C-C----CAGGA---GTTT-G-AGAC-CAG-AC-T--GGGCAA-C-AAA-A-GGAG-A---C-CC-CATCTCT--------------------------------
>AluJo_119
----------------------------------------------------CCGG--GC---ACTGTGGCTC-ATGCC----TG-T-TAT------TC----TAAC-A-C-TT-TGGAAG-GCT----GA---AGT-------G------GAGGATTGC-T-------T--------GAG-C-C----C--GA---GTTC-G-AGAC-CGG-CC-T--GGGCAA-C-ATA-G--GAG-A---C-CC-CATCTCTGCAAAA--------------------------
>AluJo_120
--------------------------------------------------GGCCAG--GA---ACAGTGGCTC-ATGCC----TG-T-AAT------TC----TGAC-A-C-TT-TAGGAG-GCT----GA---AGT------GG------GAGGATGGC-T-------T--------GAA-C-C----CAGGA---GTTC-G-AGAC-CAA-CC-T--GGGCAA-C-ATA-G-TGAG-A---C-CC-CGTCTCT--------------------------------
>AluJo_121
--------------------------------------------------GGCCTG--GC---ACTGTGGCTC-ATGCC----TG-T-AATTGTAATCC----CAGC-A-C-TT-TGGGAG-GCC----GA---GGT------TG------GAGGATCGC-T-------T--------GAG-T-T----TAGGA---ATTT-A-ACAC-CAG-CC-T--GGGCAG-T-ACA-G-TGAG-A---CCCC----------------------------------------
>AluJo_122
--------------------------------------------------GACCAG--GC---ATGGCGGCTC-ACACC----TG-T-AAT------CC----CAGC-A-C-TT-TGGGAG-GAC----AA---GGC------GA------ACGGATCCT-T-------T--------GAG-C-C----CAGGA---GTTC-A-AGAC-CAG-CC-T--GGGCAA-C-ATA-G-GTAG-A---C-CA-TGTCTCT--------------------------------
>AluJo_123
--------------------------------------------------GGCTTG--GC---ATTGTGGCTC-ACGCC----TG-A-AAT------CC----CAGC-A-C-TT-TGGGAG-GCT----GA---AGC------TA------GTGGATCAC-T-------T--------GAG-C-C----CAGGA---GTTC-A-AGAC-CAG-CC-T--GGGCAA-C-ATA-T-TGAG-A---C-TC-TGTCTCT--------------------------------
>AluJo_124
---------------------------------------------------GCCAG--TC---ACGGTGGCTC-ACACC----TG-T-AAT------CC----CAGC-A-C-TT-TGGGAG-GCC----TA---GGC------AG------GCATACTGG-C-------T--------GAG-C-C----CAAGA---CTTC-A-AGAC-CAG-CC-T--GGGCAA-C-ATA-G-CCAG-A---C-CT-TGTATCTA-------------------------------
>AluJo_125
--------------------------------------------------GGCCAG--GA---GAGGTGACTC-ACGCC----TG-T-AAT------CC----CAGC-A-C-CT-TGGAAG-GCT----GA---GGT------GA------AAGGATTTT-T-------T--------GAG-C-T----CAGGA---GTTC-A-AGAC-CAG-CC-T--GGGCAA-C-ATA-C-TGAG-A---C-CC-TGTCTCT--------------------------------
>AluJo_126
-----------------------------------------------------------C---ACGGCGGCTC-ATGCC----TG-T-AAT------CC----CAGC-A-C-AT-TGGGAG-GCT----AA---GGT------GG------GAGGATACG-T-------G--------GAG-C-C----CAGGA---GTTC-A-AGAC-TAC-CC-TGGGGGCTA-T-ATG-G-CGAG-A--------CATCTTTATTAAAAA------------------------
>AluJo_127
--------------------------------------------------------------------------------------T----------CC----CAGC-C-C-TC-TGGGAG-GTC----AA---GGC------AG------GAGGATCAC-T-------T--------GTG-C-C----CAGGG---GGTT-G-AGAC-CAG-CC-T--GCGCAA-C-ATA-G-GGAG-G---T-CT-CATCTCTACAAAATAATAATAATAATATAAAAATT----
>AluJo_128
--------------------------------------------------GGCTGG--GC---ATGATGGCTC-A-GCC----TC-T-AAT------CC----CAGC-A-T-TT-TGAGTG-GCC----AA---GAT------GG------GCAGATTGC-T-------T--------GAG-C-C----CAGGA---GTTC-A-AGAC-CAG-CC-T--GGGCAA-C-ATA-G-CGAG-A---T-TC-CATCTCTA-------------------------------
>AluJo_129
---------------------------------------------------GCTGG--GC---AGAGTGGCTC-ATGCC----TG-T-AAT-------C----TAGC-A-C-TT-TGCGAG-ACC----AA---AGA------GA------GAGGATCAC-C-------T--------GAG-C-C----CAGGA---GTTT-G-AGAC-CAG-CC-A--GGGCAA-C-ACA-G-TGAG-A---C-CC-CAACTCTAC------------------------------
>AluJo_130
--------------------------------------------------GGCCAG--GC---TCAGTGGCTC-ACGCC----TG-T-AAT-----------------A-C-CA-TTGGAG-GCT----GA---GGT------GG------GAGGATTGT-T-------T--------GCA-C-C----AAGGA---GTTT-G-AGAC-CAG-CC-T--GGGCAA-C-ATA-G------A---CCAC-TGTCTTTCTACAAAAA-----------------------
>AluJo_131
-----------------------------------------------------------------------------------TG-T-ACT------TC----CAGC-A-T-TT-TGGGGG-GCC----TA---GGT------GG------GAGAAGGGC-T-------T--------GAG-C-C----CAGGA---GTTT-G-AGAC-CAG-CC-T--GGGCAA-C-ATA-G-CAAGAA---C-CC-TGTCTCTACAAAAAAATACAAAAATTTGT----------
>AluJo_132
--------------------------------------------------GGCCAG--GC---ACAGTAGCTC-ACCCA----TG-T-AAT------AC----CAGC-A-T-TT-TGGGAG-GTT----GA---GGT------GG------GAGGATTGC-T-------T--------GAG-C-C----CAGGA---GTTA-G-AGAC-CAG-CC-T--GGGCAA-C-ATA-G-CAAG-A---C-CC-TGTCTCT--------------------------------
>AluJo_133
--------------------------------------------------GGCCAG--GC---ACAATGGCTC-ACACC----TG-T-AAT------CC----CAGT-A-C-TT-TGATAAGGCT----GA---GGC------TG------GAGAAGACC-T-------T--------GAG-C-C----CAGGA---GTTC-A-AGAC-CAG-CC-T--GGGCAA-C-ATA-G-TAAG-A---C-CC-CATCTC---------------------------------
>AluJo_134
---------------------------------------------------GCTGG--GC---ACGGTGGCAG-ATGCC----TG-T-AAT------CG----CAGC-A-C-TT-TGGGAA-GCC----AA---GCA------AG------GCAGATCAC-T-------T--------GAA-C-T----CAGGA---GTTT-G-AGAC-CAG-CC-T--GGGCAA-C-ACA-G-TGAA-A---C-CC-CATCGCTA-------------------------------
>AluJo_135
---------------------------------------------------GCTGG--GC---ATGTTGGCTC-ATGCC----TA-T-AAT------CC----CAAC-A-C-TT-TGGGAG-GTC----AA---GGG------AA------GGGTATCAC-T-------T--------GAG-C-C----CAGGA---GTTT-G-AGAC-CAG-CC-T--AGGCAA-C-ACA-G-TGAG-A---T-CC-TGTCTCTA-------------------------------
>AluJo_136
---------------------------------------------------GCTGG--GC---ACAGTGCCTC-ACACC----TG-T-AAT------CT----CAAC-A-C-TA-TGGGAG-GCC----GA---GGC------AG------GAGGATCAC-T-------T--------GAG-C-C----CAGGA---ATTT-G-AGAC-CAG-CC-T--GGGCAA-T-GTG-G-CAAA-A---C-CC-CATCTCTA-------------------------------
>AluJo_137
---------------------------------------------------GCCAG--GC---ATGGTGGCTC-ATGCC----TA-T-AAT------CT----CAGC-A-C-TT-TGGGAG-GTA----GA---GGC------AG------GAAGATCAC-T-------T--------GAG-C-C----CAGGA---GTTC-G-AGAC-CAG-TC-T--GGGCAA-C-ATA-G-GAAG-A---T-CC-CATTTCTA-------------------------------
>AluJo_138
--------------------------------------------------GGCTGG--GT---GTGATGGCTC-ACACC----TG-T-AAT-----CCC----CAGG-A-C-TT-TGGGAC-GCC----AA---GGT------GG------GAGGATCAC-T-------T--------GAG-C-C----CAGGT---GTTC-A-AAAT-CAG-CC-T--GGGCAA-C-AAA-G-CAAG-A---C-CC-CGTCTC---------------------------------
>AluJo_139
--------------------------------------------------GGCCGG--GA---GCCATGGCTC-ACGCC----TG-T-AAT------CC----CGGC-A-C-TT-TGGCAG-GCT----GA---GGC------AG------GAGGATAGC-T-------T--------GAG-C-A----TAGGA---GTTC-G-AGAC-CAG-CA----TGACAA-C-ATA-G-CGAG-A---G-CC-TGTCTCTA-------------------------------
>AluJo_140
--------------------------------------------------GGTGGG--GC---ATGGTGGCTC-ACACC----TG-T-AAT------CC----CAGC-A-T-TT-TTGGAG-GCC----AA---GGT------GG------GAGGACTGC-G-------T--------GAG-C-T----AAGAA---GTTT-G-AGAC-AAG-CC-T--GGGCAA-C-ATA-G-TGAG-A---C-CC-AGTCTCT--------------------------------
>AluJo_141
--------------------------------------------------GGCCAG--GT---GCAGTAGCTT-ACGCC----TG-T-AAT------CT----GAGC-A-C-TT-TGGGAG-GCC----AA---GGC------AG------ATGGATCGC-T-------T--------GAA-T-C----CAGGA---GTTC-G-AGAC-CAG-CC-T--GGGCAA-C-ACA-G-CGAA-A---C-CC-CATCTCT--------------------------------
>AluJo_142
--------------------------------------------------GGCTGG--AT---ATGACGGCTC-ATGCC----TG-T-AAT------CC----CAGC-A-C-TT-TGGGAG-GCC----AG---GGC-------A------GAGGATTGC-T-------T--------GAG-C-T----CAGCA---GTTT-G-AGAC-TAG-CC-T--GGGCAA-C-ACA-G-CAAG-A---T-CG-CATCTCTA-------------------------------
>AluJo_143
--------------------------------------------------GGCTGG--GC---ATGGTGGCTG-AGGCC----TG-T-AAT------CT----CAGC-A-C-TT-TGGGAG-GCC----TA---GGT------GG------GGGGATCAC-T-------T--------GAG-C-C----CAGGA---GTTC-G-AGAC-CAG-CC-T--GGGCAA-C-ATA-G-CAGG-A---C-CT-CACCTCT--------------------------------
>AluJo_144
---------------------------------------------------GCCAG--GC---ACAGTGGCTC-ACACC----TA-C-AAT------TC----CAAC-A-C-TT-TGGGAG-GCC----AA---AGC------GG------GCAGATGGT-T-------T--------GAG-C-T----TGGGA---GTTA-G-AGAC-TAG-CC-T--GGGCAA-C-ATA-G-TGAG-A---C-CC-TGTCTTTA-------------------------------
>AluJo_145
--------------------------------------------------GGCCAG--GC---ACGATGGTTC-ACGCC----TG-T-AAT------CC----CAGC-A-C-TT-TCCAAG-GTC----AA---GGT------GG------GAGGATCAC-T-------T--------GAG-C-T----CAAGA---GTTC-A-AGAC-CAG-CC-T--GGGCAA-T-ATA-G-TGAG-A---C-CC-CATCTTT--------------------------------
>AluJo_146
--------------------------------------------------GGCCA---GT---GCAGTGGCTC-ACGCC----TG-T-AAC------CC----CAGC-A-C-TT-TGGGTG-GCC----AA---GAT------GG------GAGGATTGC-T-------T--------GAG-C-C----CAGGA---GTTC-A-AGAT-CAG-CC-T--GGGCAA-C-ATG-G-CGAG-A---C-AT-CGTCTCTA-------------------------------
>AluJo_147
--------------------------------------------------GGCCAG--GC---GCAGTGGCTC-ACATC----TG-T-AAT------CC----CAGC-A-C-TT-TGGGAG-GCC----AA---GGT-----GGG------GAGGATCCC-T-------T--------GAG-C-C----CAGGG---GTTC-G-AGAC-CAA-GC-T--GGGCAA-A-ACC-G-TGAG-A---C-CC-CATTTC---------------------------------
>AluJo_148
--------------------------------------------------GGCCAG--GC---ATGGTGGCTC-ATGCC----TG-T-AAT------CC----CAGT-A-C-TT-TGGGAG-GCC----GA---GGT------GG------GGGGATCAC-T-------T--------GAG-C-T----CAGGA---GTTC-G-ATAC-CAG-CG-T--GGGAAA-T-ATG-G-TGAG-A---C-CC-CCTATCT--------------------------------
>AluJo_149
--------------------------------------------------GACCAG--GC---GAGGTGGCTC-ATGCC----TG-TTAAT------TC----TCAC-A-C-TT-TGGGAG-GCC----GA---GAT------GG------GAGGATGGC-T-------T--------GAG-T-C----CAGGA---GTTT-G-AGAC-CAG-CC-T--GGGCAA-C-ATA-A-TGAG-A-----CC-CATCTCT--------------------------------
>AluJo_150
--------------------------------------------------GGCTGG--AC---ATGGTGGCTC-ATGCC----TG-T-GAT------CC----CAGC-A-T-TT-TGGGAG-GCT----GA---GTT------GG------GAGGATCAC-T-------T--------GAA-T-C----CAGCA---GTTT-G-AGAC-CAG-CC-T--GGACAA-T-ATA-G-TGAG-A---CCCC-TATCTC---------------------------------
>AluJo_151
--------------------------------------------------GGCTGGA-GC---GCGGTGGCTC-ACGCC----TG-T-AAT------CG----CAGC-G-C-TT-TTGGAG-GCC----AA---GAC------AG------GAGGATCGC-T-------T--------GGG-C-C----CAGGA---GTTG-A-AGAT-CAG-CC----TCGCAA-T-ATA-G-CGAG-A---C-CC-CATCTCT--------------------------------
>AluJo_152
--------------------------------------------------GGCCGG--GC---ATGGTGGCTC-ACACC----TG-T-AAT------CC----CAGC-A-C-TT-TGGGAG-GCC----GA---GGC------AA------AAGGATTGC-T-------T--------GAG-C-C----CAGGA---GTTT-G-AAAC-CAG-AT-T--GGGCAA-C-AGA-A-CCAG-A---C-CC-TCTCTCT--------------------------------
>AluJo_153
--------------------------------------------------GGTCAG--GT---GTGGTGGCTC-ACACC----TG-T-AAT------CC----CAGC-A-C-TT-TGAGAG-GCC----AA---GAT------GG------GGGGATCTC-T-------T--------GAG-T-C----CAGGA---GTTC-A-AGAC-TAG-CC-T--GGGCAA-C-ATA-G-TGGA-A---T-CC-TGTCTCT--------------------------------
>AluJo_154
---------------------------------------------------------------GTGGTAACTC-ATGCC----TG-T-AAT------CC----CATT-G-C-TT-TGGGAG-GCT----GA---AGC------AG------GAGGATCTC-T-------T--------GAG-C-G----GAGGA---GTTT-G-AGAC-TAG-CC-T--GGGCAA-C-ATA-G-CAAG-A---C-CC-CATCTCTCTAAAAAA------------------------
>AluJo_155
---------------------------------------------------------------GCAGCAGCTC-ACTCC----TG-T-AAT------CC----CAGC-A-C-TT-TGGGAA-GCT----GA---GGC------AG------GAGGATGGT-T-------T--------GAG-C-C----CACGA---GTTC-G-AGAT-CAG-CC-T--GAGCAA-C-AAA-G-TGAG-A---C-CC-TGTCTCTTTAAAAAA------------------------
>AluJo_156
--------------------------------------------------GGCCAG--AC---ATGGTGGCTC-ATGCC----TA-T-AAT------CC----TAGC-A-C-TT-TGGGAG-GAC----GA---GGC------GG------GAGGATTGC-T-------T--------GAG-C-C----CAGGA---ATTT-A-AGAC-CAG-CC-T--GGGCAG-C-ATA-T-CGAG-A---C-AC-TCTCTCT--------------------------------
>AluJo_157
--------------------------------------------------GGCTGG--GC---ACGGTGGCTC-ACACC----TG-T-AAT------CC----CAGC-A-C-TT-TGGGAG-GCC----AA---GAT------AC------GAGGATTCC-T-------T--------AAG-C-C----CAGGA---GTTC-G-AGAC-CAG-CC-T--GGTCAA-C-ATA-G-CGAA-G---C-CC-CGTCTCT--------------------------------
>AluJo_158
--------------------------------------------------GGCCGG--GC---GCGGTGGCTC-ATGCC----TG-T-AAT------CC----CAGC-A-C-TT-TGGGAG-GCC----GA---GGC------AG------GAGGATCAC-T-------T--------GAG-C-C----GGGGA---GTCA-G-AGAC-CAG-CC-T--AGGTAA-C-AAA-G-CGAA-A---C-TT-CGTGTCT--------------------------------
>AluJo_159
--------------------------------------------------GGTTGG--GT---TTGAGGCCTC-ACACC----TG-T-AAT------CC----TAGC-A-C-TT-TGGGAG-GCC----GA---GGC------AG------GAGGATCAC-T-------G--------GAG-C-C----CAGGA---GTTT-G-AGAC-CAG-CT-T--GGGCAG-G-ACA-G-TGAG-A---C-TC-CATCTCT--------------------------------
>AluJo_160
--------------------------------------------------GGTCGG--GT---GAGGTGGCTC-ATGCC----TG-T-AAT------CC----CAGC-A-C-TT-TGGGAG-GCA----GA---AGT------GG------GAGGATTGC-T-------T--------GAG-C-C----CAGAA---GTTC-A-AGAC-CAG-CT-T--GGGCCA-C-AAA-A-CAAG-C---C-CC-CATCTCT--------------------------------
>AluJo_161
--------------------------------------------------GGCCGG--GC---ATGGTGGCTC-ATGCC----TG-T-AAT------CC----CAGC-C-C-TT-TAGGAG-GCC----AA---GGC------AG------GAGGATTGC-C-------T--------GAG-C-T----CAGGA---GTTC-A-AAAC-CAG-CC-T--GGGCAA-C-GTA-G-TGAG-A---C-CC-TGTCACT--------------------------------
>AluJo_162
--------------------------------------------------GGCCGG--GC---ATGGTGGCTC-ATGCC----TG-T-AAT------CC----CAGC-C-C-TT-TAGGAG-GCC----AA---GGC------AG------GAGGATTGC-C-------T--------GAG-C-T----CAGGA---GTTC-A-AAAC-CAG-CC-T--GGGCAA-C-GTA-G-TGAG-A---C-CC-TGTCACT--------------------------------
>AluJo_163
--------------------------------------------------GGCCGG--GC---ATGGTGGCTC-ATGCC----TG-T-AAT------CC----CAGC-C-C-TT-TAGGAG-GCC----AA---GGC------AG------GAGGATTGC-C-------T--------GAG-C-T----CAGGA---GTTC-A-AAAC-CAG-CC-T--GGGCAA-C-GTA-G-TGAG-A---C-CC-TGTCACT--------------------------------
>AluJo_164
--------------------------------------------------GGCTGC--GC---ATGGTGGCTC-ACACC----TG-T-AAT------CC----CAAC-A-C-TT-TGGGAG-GCT----GA---GGT------GG------GAGGATTGC-T-------T--------GAA-T-C----CAGGA---GTTC-A-AGAC-CAG-CC-T--GGCCAA-C-AGG-G-TGAA-A---C-CC-TGTCTCT--------------------------------
>AluJo_165
--------------------------------------------------GGCCGG--GT---GTGGTGGCTC-ATGCC----TG-T--AT------CC----CATC-A-T-TT-TGGGAG-GCC----CA---GGT------GG------GAGAATCGC-T-------T--------GAG-C-C----CAGGA---GT----------AGT-TC-T--GGACAA-C-AGA-A-CAAG-A---C-CC-TGTCTCTATTAAAAA------------------------
>AluJo_166
---------------------------------------------------GCTGG--GT---GTGGTGCCTC-ACACC----TG-T-AAT------CC----CAGC-A-C-TT-TGAGAG-GCC----AA---GGT------GG------GAGTATCGT-T-------T--------GAG-C-C----CAGGA---GTTC-A-AGAC-AAG-CC-T--GGACAA-C-AGA-G-CAAG-A---C-CC-TGTCTCTA-------------------------------
>AluJo_167
---------------------------------------------------GCTGG--GC---ATAGTGGCTC-ACACC----TG-T-AAT------CC----CAGC-A-C-TT-TGGGAG-GCC----AA---GGT------GG------GAGTATGGT-T-------T--------GAG-C-C----CAGGA---GTTC-A-AGAC-CAG-CC-T--GGCCAA-C-ATA-G-CAAG-A---G-CC-TATCTCCA-------------------------------
>AluJo_168
------------------------------------------------------GG--AT---GCAGTGACTC-ACACC----TG-T-AAT------CC-----AAC-A-C-TT-TGGGGGCGCT----GA---GGC------AG------AAGGAATGC-T-------T--------GAG-C-C----CAGGA---GCTC-G-AGAC-CAG-CC-T--GGGCAA-C-ATA-G-TGAG-A---C-CC-CGTCTCTCTAA----------------------------
>AluJo_169
--------------------------------------------------GGCTGG--GA---GCGGTGGCTC-ATGTT----TG-T-AAT------CC----GAGC-A-C-TT-TGGGAG-GCC----AA---GGC------AG------GAGGATCAC-T-------T--------GAG-C-C----CAGAA---ACTC-G-AGAC-CAA-CC-T--GGGCAA-C-ATA-G-TGAG-A---C-CT-CATATCT--------------------------------
>AluJo_170
--------------------------------------------------GGCCAG--GT---GCGGTAGCTC-ATGCC----TG-T-AAT------TT----CAGC-A-C-TT-TGGGAG-GCC----AA---GGC------AG------GAGGATCAT-T-------T--------GAG-T-T----CAAGA---GTTT-G-AGAC-CAG-CC-T--GGGTAA-C-ACA-G-TGAG-A---A-CT-CATCTCT--------------------------------
>AluJo_171
--------------------------------------------------GGCCAG--GC---ACTGTGGCTT-ATGCC----TG-T-AAT------CC----CATC-A-C-TT-TGGGAG-ATA----GA---GGT------GG------GAGGATTAG-T-------T--------GAG-C-C----C-------ATCT-G-AGAC-CAG-CC-T--GGGCAA-C-ATA-G-TGAG-A---T-CC-TGTCTCTACAG----------------------------
>AluJo_172
--------------------------------------------------GGTTGG--GC---ATGGTGGCTC-ACACC----TG-T-AAT------CC----CAGT-G-C-AT-TCGGTG-GCC----AA---GGC------AG------GAGGGTCAC-T-------T--------GAG-C-C----CAGGA---GTTT-G-AGAC-CAG-CC-T--GGGCAA-C-ATA-G-TGAG-A---T-TC-CGTCCCT--------------------------------
>AluJo_173
--------------------------------------------------GGTTGG--GC---GTGGTGGCTC-ACACC----TG-T-AGT------CC----TAGC-A-T-TT-TGGGAG-GCC----GA---GGC------AA------GAGGATTGC-T-------T--------AAG-C-C----CAGGA---GTTT-G-AGAC-CAG-CT-T--GGGCAA-T-ACA-G-TGAG-A---C-CC-CATCTCT--------------------------------
>AluJo_174
--------------------------------------------------GGCTGG--GC---ATGGTGGCTC-ACACC----TG-T-AGT------CC----TAGC-A-T-TT-TGGGAG-GCC----GA---GGC------AA------GAGGATTGC-T-------T--------AAG-C-C----CAGGA---GTTT-G-AGAC-CAG-CT-T--GGGCAA-T-ACA-G-TGAG-A---C-CC-CATCTCT--------------------------------
>AluJo_175
--------------------------------------------------GGCTGG--GC---ATCGTGGCTC-ACACC----TG-T-AGT------CC----TAGC-A-T-TT-TGGGAG-GCC----GA---GGC------AA------GAGGATTGC-T-------T--------AAG-C-C----CAGGA---GTTT-G-AGAC-CAG-CT-T--GGGCAA-T-ACA-G-TGAG-A---C-CC-CATCTCT--------------------------------
>AluJo_176
---------------------------------------------------GCTGG--GC---ATGGTGGTTC-ATGCC----TG-T-AAT------CC----CAGC-A-C-TT-TGGGAG-GCC----AA---GGC------AA------GAGGATCCC-T-------T--------GAG-C-C----CAGGA---GTTT-G-AGAT-CAG-CC-T--GAGCAA-C-ATA-G-CGAA-A---C-CT-TGTCTCCA-------------------------------
>AluJo_177
---------------------------------------------------GCTGG--GT---GCAGTGGTTC-ACACT----TG-T-AAT------CC----CAGC-A-C-TT-TGGGAG-GCG----AA---GGC------AG------GAGGAGTGC-T-------T--------GAG-T-C----CATGA---GTTC-A-AGAC-CAG-CC-T--GGGCAA-C-AGA-C-GGAG-A---C-AC-CGTGTCTA-------------------------------
>AluJo_178
--------------------------------------------------GGCTGG--GC---ATGGTGGCAC-ATACC----TG-T-AAT------CC----CAGC-A-T-TT-TGGGAG-GCT----GA---GAT------GG------GAGGATCAC-T-------T--------GAG-T-C----CAAGA---GTTC-A-AGAC-CAG-CC----TGGCAA-G-ATA-G-CAAG-A---CCCC-CTTCTCT--------------------------------
>AluJo_179
--------------------------------------------------GGCTGG--GC---ACGGTGCCTC-ATGCC----TG-T-AAT------TC----CAGC-A-C-TT-TGGGAG-GCT----GA---GGC------AA------GAGGATCGT-T-------T--------GAG-C-T----CAGGA---GTTT-A-AGAC-CAG-CC-T--CGGCAA-C-ATA-T-CAAG-A---C-CC-CATCTCT--------------------------------
>AluJo_180
--------------------------------------------------GGCTGG--GT---GTGGTGGCTC-ACACC----TG-T-AAT------TC----CAAT-G-C-TT-TGGGAG--CC----GA---GGC------AG------AAGGATTGC-T-------T--------GAG-C-C----TAGGA---GTTT-G-AGAC-CAG-CC-T--GGGCAG-C-ACA-G-TGAG-A---T-CC-CATCTCTA-------------------------------
>AluJo_181
---------------------------------------------------GCTGG--GT---GCAGTGGCCC-ATGCC----TG-T-AAT------CC----CAGC-A-C-TT-TGGGAG-GCC----GA---GAC------GG------GAGGATCAC-T-------T--------GAG-C-C----CAGGA---GTTC-G-AGAC-CAA-CC-T--GAGCAA-C-ATA-G-CAAG-C---C-CC-CATCACTA-------------------------------
>AluJo_182
--------------------------------------------------GGCCGG--GT---GCAGTGGCTC-GTGCC----TG-T-AAT------CC----CAAC-A-C-TT-TGGGAA-GCC----AA---GGT------GG------GAGGACTGC-T-------T--------GAG-T-C----CAGGA---GTTC-G-AGAA-CAG-TC-T--GGGCAA-C-ATA-G-TGAG-A---C-CC-TGTCTTT--------------------------------
>AluJo_183
--------------------------------------------------GGCAAG--GC---ACAGTGGCTC-ATACC----TG-T-AAT------CC----CAGC-A-C-TC-TGGGAG-GCT----GA---GGC------AG------GAGGATAAC-T-------T--------GAA-C-C----CAGGA---GTTT-G-AGAA-CAG-CC-T--GGGCAA-C-ATG-G-GGAG-A---C-CT-CGTCTTT--------------------------------
>AluJo_184
--------------------------------------------------GGCTAA--GC---ATGGTGGCTC-ACATT----TG-T-AAT------CC----CAGC-A-C-TT-TGGGAG-GCC----AA---GGT------AG------GAGGATTGC-T-------T--------GAG-C-C----CAGGA---GTTC-A-AGAC-CAA-GC-T--GGCCAA-T-GTA-G-TGAG-A---C-CC-TGTCTCT--------------------------------
>AluJo_185
--------------------------------------------------GACCTG--GT---GCAGTGGCTC-ACATC----TG-C-AAT------CC----CAGC-A-C-AT-TGGGAG-GCC----AA---GGT------GG------GAGGATTGC-T-------T--------AAG-T-C----CAGGA---GTTT-G-AGAC-CAG-CC-T--GGGCAA-C-ATG-G-CAAG-A---C-CC-CATCTCT--------------------------------
>AluJo_186
--------------------------------------------------GGCTGG--GC---ATGGTGATT--ACACC----TG-A-AAT------CC----CAGC-A-C-TT-TGAGAG-GCC----AA---GGT------AG------AAAGATTGC-T-------T--------GAG-C-C----CAGGA---GTTC-G-AGAC-CAG-CC-T--GGGCAA-C-ACA-A-GGAG-A---C-CC-TGTCTCTA-------------------------------
>AluJo_187
--------------------------------------------------GGCTGG--GT---GTGCTGGCTC-ATGCC----TG-T-AAT------CC----CAGC-A-C-TT-CGGGAT--CT----GA---GGT------GG------GAGGATCGC-T-------T--------GAG-C-C----TAGGA---GTTC-A-AGAC-CAG-CC-T--GGGCAA-C-ATC-G-CGAG-A-----CCCTGCCTCTA-------------------------------
>AluJo_188
---------------------------------------------------GCAGG--GT---TCAGTGGCTC-AAGCC----TG-T-AAT------CC----CAAC-A-A-TT-TGAGAG-GCC----GA---GGC------AG------GAAGATCGC-T-------T--------GAG-C-C----CAGGT---GTTC-G-AGAC-CAG-CC-T--GGGCAT-C-ATA-G-TGAG-A---C-CT-CATCTCTA-------------------------------
>AluJo_189
---------------------------------------------------GCCGG--GC---GCAGTAGCTC-ACGCC----TG-T-AAT------CC----CAGC-A-C-TC-TGGGAG-TCT----GA---GGC------GG------GAGGGTCCC-T-------T--------GAG-T-C----CAGGA---GTTC-A-AGAC-CAG-CC-T--GGGCAG-T-GTA-G-TGAA-A---C-CC-CATCTCTA-------------------------------
>AluJo_190
---------------------------------------------------GCCGG--GC---ACAGTGGCTT-ATACC----TG-T-AAT------CA----CAGC-A-C-TT-TGGGAG-GTT----GA---GGA------GG------GAGGATTGC-T-------T--------GAG-C-C----CAGGA---GTTT-G-AGAG-CAG-CC-T--AGGCAA-C-ATG-G-TGAA-A---C-CC-TGTCTCTA-------------------------------
>AluJo_191
--------------------------------------------------GGCTGG--GT---GTGGTGGCTC-ACATC----TG-T-AAT------CA----CAGC-A-C-TT-CGGGAA-GCC----GA---GGC------AG------GAGGATCAC-T-------T--------GAG-C-C----TAGGA---GTTC-A-AGAC-CAG-CC-T--GGGCAA-C-AGA-G-GGAG-A----CCC-TGTCTCT--------------------------------
>AluJo_192
--------------------------------------------------GGCTGG--GT---GCGGTGGCTC-ACACC----TA-T-AAT------CC----CAGC-A-C-TT-TGGGAA-GCC----AA---GGC------AG------GAGGACTGC-T-------T--------GAG-T-C----TAGGA---GTTC---AGAC-CAG-CC-T--GGGCAA-C-ATA-G-GGAG-A---CCCC-TGTCTCT--------------------------------
>AluJo_193
---------------------------------------------------GCTGG--GC---ATGATGACTC-ATGCC----TG-T-AAT------CC----TAGC-A-C-TT-TGGGAG-GCC----AA---AGT------GG------GAGGATTGC-T-------T--------GAG-C-C----CAGGT---GTTT-G-AGAC-CAG-CC-T--GGACAA-C-ATA-G-TGAG-A---C-CC-CCTTTCTA-------------------------------
>AluJo_194
--------------------------------------------------GGCCGG--GC---GTGGTGGCTC-ATGCC----TG-T-AAT------CC----CAGC-A-C-TT-TGAGAG-GCT----GA---GTG------GA------GAGGACTGC-C-------T--------GAG-C-C----CAGGA---GTTC-A-AGAC-CAA-CC-T--GGGCAA-C-ATG-G-TGAG-A---C-CC-TGTCTCT--------------------------------
>AluJo_195
--------------------------------------------------GGCTGG--GC---ATTGTGGTTG-ACGCC----TG-T-AAT------CC----CAGC-A-C-TT-TGAGAG-GCC----AA---GAC------GG------GAGAATTGC-C-------T--------GAG-C-C----CAGGA---GTTT-G-AGAC-CAG-CC-T--GGGCAA-C-ATG-A-CGAA-A---C-TC-TGTCTCT--------------------------------
>AluJo_196
--------------------------------------------------GGCTGG--GC---ATGGTGACTC-ACACT----TA-T-AAT------CT----CAGC-A-C-TT-TGGGAG-GCT----GA---GGT------GG------GAGGATCGC-T-------T--------GAG-C-C----CAGAA---GTTC-A-AGAC-CAA-CC-T--GAGCAA-C-GTA-G-TGAG-A---C-CC-CATCTCT--------------------------------
>AluJo_197
--------------------------------------------------GGCCAG--GC---GCGGTGGCTC-ACGTC----TG-T-AAT------CC----CAGC-A-C-TT-TGGGAG-ACT----GA---GAC------AG------GAGGATCGC-T-------T--------GAG-C-C----CAGGA---GTTC-A-AGAT-CAG-TC-T--GGACAA-C-GTA-A-GGAG-A---C-CC-TGTCTCT--------------------------------
>AluJo_198
--------------------------------------------------GGCCGG--GC---ATGGTGGCTC-ATGCC----TG-T-AAT------AC----CAGA-A-C-TT-CGGGAG-CCC----GA---GGC------GG------GAGGATCAC-T-------T--------GAG-C-C----CAGGA---GTTG-G-AAAC-CAG-CC-T--GGGCAA-A-ATA-G-GGAG-C---C-CC-TGTCTCT--------------------------------
>AluJo_199
----------------------------------------------------------GC---ACTGTGGCTC-ACGCC----TG-T-AAT------CC----CAGC-A-G-TT-TGGAAG-ACC----GA---GGC------AG------GAGGATGGC-T-------T--------GAG-C-T----TAGGA----TTC-A-AAAC-CAG-CC-T--GGGAAA-C-ATA-G-TGAG-A---C-CC-TGTCTCTACAAAAA-------------------------
>AluJo_200
--------------------------------------------------GGCAGG--GC---ACAGTGGATC-ATGCC----TG-T-AAT------CC----CAGC-A-C-TC-TGGGAG-ACC----TA---GGC------AG------GAGGATTAC-T-------T--------GAT-C-C----CAGGA---GTTT-G-AGAC-CAG-CC-T--GGGCAG-C-ACA-C-ACAG-A---C-CC-CGTCTCT--------------------------------
>AluJo_201
--------------------------------------------------GGCAGG--GC---ACAGTGGATC-ATGCC----TG-T-AAT------CC----CAGC-A-C-TT-TGGGAG-ACC----TA---GGC------AG------GAGGATTAT-T-------T--------GAG-C-C----CAGGA---ATTT-G-AGAC-CAG-CC-T--GGGCAG-C-ACG-C-AGAG-A---C-CC-CAACTCT--------------------------------
>AluJo_202
--------------------------------------------------GGCAGG--GC---ACAGTGGATC-ATGCC----TG-T-AAT------CC----CAGC-A-C-TT-TGGGAG-ACC----TA---GGC------AG------GAGGATTAT-T-------T--------GAG-C-C----CAGGA---ATTT-G-AGAC-CAG-CC-T--GGGCAG-C-ACA-C-AGAG-A---C-CC-CAACTCT--------------------------------
>AluJo_203
--------------------------------------------------GGCTGG--AT---GTGGTGGCTC-ATGCC----TG-T-AAT------CC----CAGT-G-C-TT-TGGGAG-GCC----AA---GGC------AG------TAGGATCAC-T-------T--------GAG-C-T----CAGGA---GTTT-G-AGAC-TAG-CT-T--GGGCAA-C-ACA-G-TGAG-A---C-CC-CATCTCT--------------------------------
>AluJo_204
--------------------------------------------------GGCCAG--GC---ACAGTGGCTC-ACACT----TG-T-AAT------CT----CAGC-A-C-TT-TGGGAG-GCT----GA---GGC------AG------GAGGATCAC-T-------T--------GAA-C-C----CAAGA---GTTT-G-AGAC-CAG-CC-T--GGGCAA-C-ATA-G-TGAC-A---T-CC-CATCTCT--------------------------------
>AluJo_205
--------------------------------------------------GGCTGG--GC---ACGGTGGCTC-ACACC----CA-C-AAT------CC----CA-C-A-C-TT-TGGGAG-GCC----AA---AGT------GG------GAGGATGGT-T-------T--------GAG-C-C----CAGGA---GTTC-G-AGAC-AAG-CC-T--GGGCAA-C-ATA-G-CGAG-A---C-CC-TGTCTCTA-------------------------------
>AluJo_206
--------------------------------------------------GGCTGG--GT---GTGGTGGCTC-ACACC----TG-C-AAT------CC----TAGC-A-C-TT-TGGGAG-GCC----AA---GGT------GG------GAGGATCAC-T-------T--------GAA-C-C----CAGGA---GTTC-A-AGAC-CAG-CT-T--GGGCAA-C-ATA-G-TGAA-A---CCCT-TGTCTC---------------------------------
>AluJo_207
--------------------------------------------------GGCCAC--AT---GTGGTGGCTC-ACACC----CG-T-AAT------CC----TAGC-A-C--T-TGGGAG-GCC----AA---GGC------GG------GAGGACTGC-T-------T--------GAG-C-C----TAGGA---GTTT-G-AGAC-CAG-CC-T--GGGCAA-C-ATA-G-TGAG-A---C-CC-TGTCTCTA-------------------------------
>AluJo_208
--------------------------------------------------GGCTGG--GC---ATGGTGGCTC-ACACC----TG-C-AAT------CC----TAGC-A-C-CT-TGGGAG-GCC----AA---GGT------GG------GAGGATTGC-T-------T--------GAG-C-C----TAGGA---GTTC-G-AGAC-CAG-CC-T--GGGCAA-T-ATA-G-TGAG-A---C-CC-TGTCTCT--------------------------------
>AluJo_209
----------------------------------------------------------GC---ATGGTGGCTC-ACACC----TG-T-AAT------CC----CAGC-A-C-TT-TGGGAG-GCC----CA---GGT------GG------GAGGATTGC-T-------T--------GAG-C-C----TAGGG---ATTC-A-AGAC-CAG-CC-T--AGGCAA-C-ATA-G-GGAG-A---C-CC-TGTCTCTACAAAA--------------------------
>AluJo_210
---------------------------------------------------GCAGG--GC---ATGGTGGCTC-ATACC----TG-T-TAT------CT----CAGC-A-C-TT-TGGGAG-GCT----GA---GGC------AG------GAAGATCGC-T-------T--------GAG-C-C----CAGGA---GTTC-G-AGAC-CAG-CT-T--GGGCAA-T-ATA-G-TGAG-A-----CCTCATCTCTA-------------------------------
>AluJo_211
----------------------------------------------------CTGG--GC---ATGGTGGCTC-ATGCC----TG-T-AAT------CC----CAGC-A-C-TC-TGGGAG-GCT----GA---GGC------AG------GAAGATCAC-T-------T--------GAG-C-C----AAGGA---GTTG-G-AGAT-CAG-CCTT--GGGCAA-C-ATA-G-GGAG-A---CCCT-CATCTCT--------------------------------
>AluJo_212
--------------------------------------------------GGCCAG--GC---ATGGTGACTC-ACACC----TG-T-AAT------CC----CAGC-A-C-TT-TGGAAG-GCC----AA---AGC------AA------GAGGATCAC-T-------T--------GAA-C-C----CAGGA---GGTC-G-AGAC-CAG-CC-T--GGGCAA-C-ATA-G-TGGG-A---C-TC-CATCTCT--------------------------------
>AluJo_213
----------------------------------------------------------GC---ACAATGGCTC-ACCCC----TG-T-AAT------GT----TAGC-A-C-TT-TGGGAG-GCC----AA---GGC------GG------GAGGATTAC-T-------T--------GAG-C-C----CAGGA---GTTT-G-AGAT-----------GGGCAA-C-ATA-G-CAAG-A---CTCC-CACCTCTACCAAAAAATA---------------------
>AluJo_214
--------------------------------------------------GGCGGG--GT---GTAGTCGCTC-ACACC----TG-T-AAT------CC----TAGC-A-C-TT-TGGGAG-GCC----GA---GGC------AG------GAGGAACAC-T-------T--------GAG-C-C----CAGGA---GTTC-G-AGAC-CAG-CC-T--GGGCAA-C-ATA-G-TAGG-A---C-CT-TGTCTCT--------------------------------
>AluJo_215
--------------------------------------------------GGCCA---GG---ATGGTGGCTC-ACACC----GG-T-AAT------CC----CAGC-A-C-TT-TGGGAG-GCC----AA----GC------GG------GAGGATCAC-C-------T--------GAG-C-C----CAGGA---ATTC-A-AGAC-CAG-CC-T--GGGCAA-C-ATA-C-TGAG-A---C-AC-CATCTCTAC------------------------------
>AluJo_216
--------------------------------------------------GGCCAG--GC---GCTGTGGCTC-ACACC----TG-T-AAT------CC----CAGC-A-A-TT-TGGAAG-GCC----GA---GG-------GG------GAGAAATGC-T-------T--------GAG-C-C----CAGGA---GTTC-A-AGAT-CAG-CC-T--GGGAAA-C-CTA-G-TGAG-A---C-CC-CATCTCTA-------------------------------
>AluJo_217
---------------------------------------------------GCCGG--GT---GCAGTGGCTC-ACACC----TG-T-AAT------CC----CAGC-A-C-TT-TGGGAA-GCC----AG---GGC------GG------GGGCATAAT-T-------T--------GAG-C-C----CAGGA---GTTC-G-AGAC-CAG-GC-T--GGGCAA-C-ATA-G-TGAG-A---C-CC-CATCTCTA-------------------------------
>AluJo_218
--------------------------------------------------GGCCAG--TC---ATGGTGGCTC-ATGCC----TA-T-AAT------CC----CAGC-A-C-TT-TGGGAG-GAC----GA---GGT------AT------GAGGATTGC-T-------T--------GAG-C-C----CAGGA---GTTT-G-AGAC-CAG-CC-T--GGGCAC-C-TTA-G-TGAG-G---C-CC-CATCTCT--------------------------------
>AluJo_219
--------------------------------------------------GGCTGG--GT---ACAGTGGCTC-ACCCC----TG-T-AAT------CC----CAGC-A-C-TT-TGGGAG-GCC----GA---GGT------GG------GAGGATTGC-T-------T--------GAG-C-C----CAACG---GTTT-G-AGAC-CAG-CT-T--CAGCAA-C-ATA-A-CGAG-A---C-CC-CATCTCT--------------------------------
>AluJo_220
--------------------------------------------------GGCAGGA-GT---GCAGTGGCTC-ACGCC----TG-T-AAT------CC----CAGC-A-C-TT-TGGGAG-GCC----GA---GGC------AG------GTGGATAGC-C-------T--------GAG-C-C----CAGGA---GTTC-A-AGAG-CAG-CC-T--GGACGA-C-AGA-A-TGAG-A-----CC-CGTCTCT--------------------------------
>AluJo_221
--------------------------------------------------GGCAAG--GC---ACAATGGCTC-ATGCC----TG-T-AAT------CC----CAAC-A-C-TT-TGGAAG-GCC----AA---GGC------GG------TAGGATTGC-C-------T--------GAG-C-C----CAGGA---GTTC-G-AGAC-CAG-CG-T--GGGCAA-C-ATA-G-T-AG-A---C-CC-CATCTCTA-------------------------------
>AluJo_222
---------------------------------------------------GCCGG--GC---ACGGTGGCTC-ACGCC----TG-T-AAT------TC----CAAC-A-C-CT-TGGGAG-GCA----GA---GAC------AG------GAGGATCTC-C-------T--------GAG-C-C----CAGGA---GTTC-A-AGAC-CAG-CC-T--GGGCAA-C-ATG-G-GGAG-A---C-TC-CGTCTCTA-------------------------------
>AluJo_223
---------------------------------------------------GCTGA--GT---GCGGTGGCAC-ACGCC----TG-T-AAC------CC----CAGC-C-C-TT-TGGAAG-GCC----GA---GGC------AG------GAGGATCAC-T-------T--------GAG-C-C----CAGGA---GTTC-G-AGAC-CAG-CC-T--GGGCAA-C-ATG-G-CAAG-A---C-CC-TGTCTCTA-------------------------------
>AluJo_224
--------------------------------------------------GGCTGG--GC---ATGGTGGCTC-ATGCC----TA-T-AAT------TC----CAGC-A-C-TT-TGGGAG-GCC----GA---GAC------AG------GAGGATTGG-T-------T--------GAG-T-C----CAGGA---GTTT-G-AGAC-CAG-CC-T--GGAAAA-C-ATA-G-CGAG-A---C-CC-CATCTCT--------------------------------
>AluJo_225
--------------------------------------------------GGCTGG--GC---ATGGTGGCTC-ATGCC----TG-T-AAT------CC----CAGC-A-C-TT-TGGGAG-GTC----AT---GGT------GG------GAGGATTAC-T-------T--------GAG-C-C----CAGAA----TTC-A-AGAC-CAG-GC-T--GGGCAA-A-ACA-A-TCAG-A---C-CC-CATCTCTA-------------------------------
>AluJo_226
--------------------------------------------------GGCTGG--GC---ATGGTGGCTC-ATGCC----TG-T-AAT------CC----CAGC-A-C-TT-TGGGAG-GTC----AT---GGT------GG------GAGGATTAC-T-------T--------GAG-C-C----CAGAA----TTC-A-AGAC-CAG-GC-T--GGGCAA-A-ACA-A-TCAG-A---C-CC-CATCTCTA-------------------------------
>AluJo_227
--------------------------------------------------GGCCGG--GT---GTGGTGGCTC-ATGCC----TG-T-AAT------CC----CAGC-A-C-TT-TGGGAG-GCC----GA---GGC------GG------GTGGATTGC-T-------T--------GAG-C-C----CAGGA---GTTC-A-AGAC-CAG-CC-T--GCATAA-C-ATA-A-TGAG-G---C-CT-TGTCTCT--------------------------------
>AluJo_228
--------------------------------------------------GGCTGG--GC---ATGGTGGCTC-ACGCC----TG-T-AAT------CC----TAGC-A-A-TT-TAGGAG-GCC----AA---GG-------GA------GAGGATCTC-T-------T--------AAG-C-C----CAGGT---GTTT-A-AGAC-CAG-TC-T--GGGCAA-C-ATA-G-GGAG-A---C-CC-TGCCTCTA-------------------------------
>AluJo_229
--------------------------------------------------GGCTGG--GC---ATGGTGGCTC-ACATC----TG-T-AAT------CC----CAGC-A-C-TT-TGGGAG-GCC----AA---TGG------GG------GAGGATTGC-T-------T--------GAG-C-C----CAGGA---GTTC-G-AGAT-CAG-CC-T--GGGCAA-C-ACA-G-GGAG-A---G-TC-TGTCTCT--------------------------------
>AluJo_230
---------------------------------------------------GCTGG--GC---ATGGTTGCTC-ATGCC----TA-T-AAT------CC----TAGT-A-C-TT-TGGGAG-GCC----AA---AGT------GG------GAGGAATGC-T-------T--------GAG-C-C----CAAGA---CTTT-G-AGAC-CAG-CT-T--GGGCAA-C-ATA-G-CAAG-A---C-CC-CACCTTTA-------------------------------
>AluJo_231
--------------------------------------------------GGCCAG--GT---GCGGTGGCTT-ATGCC----TA-T-AAT------CC----CAGC-A-C-TT-TGGGAG-GCC----GA---GAC------GG------AAGGATCAC-T-------T--------GAG-C-T----CAGGA---GTTC-G-AGAC-CAC-CC-T--GGGCAA-C-ATC-G-TGAG-A---C-GT-CGTCTCT--------------------------------
>AluJo_232
---------------------------------------------------GCAGG--GC---GTGGTGGCTC-ATGCC----TG-T-AAT------CC----CAGC-A-T-TT-TGGAAG-GCC----AA---GGT------GG------GAGGATTGC-T-------T--------GAG-C-C----CAAGA---GTTT-G-AGAT-CAG-CC-T--GAGCAA-C-ATA-G-GGAG-A---C-TT-CATCTCTA-------------------------------
>AluJo_233
--------------------------------------------------GGCCGG--GC---ACAGTGGCTC-ACACC----TG-T-AAT------CC----CAGC-A-C-TT-TGAGAG-GCC----AA----GT------GG------GAGGATTGC-T-------T--------GAG-T-C----CAGGA---GTTT-G-AGAC-CAG-CC-C--GGGCAA-C-ATG-G-CGAG-A---C-CC-TGTCTCTA-------------------------------
>AluJo_234
---------------------------------------------------GCCAG--GC---ATAGTGGCTC-AAACC----TG-T-AAT------CC----CAGC-A-C-TT-TGGGAG-GCC----AA---GGT------GG------GAGGACTGC-A-------T--------GAG-C-C----CAGGA---GTTT-G-AGAC-CAG-CC-T--GAGCAA-C-ATG-G-TGAG-A---C-CC-TGTCTCTA-------------------------------
>AluJo_235
---------------------------------------------------GCCAG--GC---ATAGTGGCTC-AAACC----TG-T-AAT------CC----CAGC-A-C-TT-TGGGAG-GCC----AA---GGT------GG------GAGGACTGC-A-------T--------GAG-C-C----CAGGA---GTTT-G-AGAC-CAG-CC-T--GAGCAA-C-ATG-G-TGAG-A---C-CC-TGTCTCTA-------------------------------
>AluJo_236
---------------------------------------------------GCCAG--GC---ATAGTGGCTC-AAACC----TG-T-AAT------CC----CAGC-A-C-TT-TGGGAG-GCC----AA---GGT------GG------GAGGACTGC-A-------C--------GAG-C-C----CAGGA---GTTT-G-AGAC-CAG-CC-T--GAGCAA-C-ATG-G-TGAG-A---C-CC-TGTCTCTA-------------------------------
>AluJo_237
--------------------------------------------------GGCCAG--GC---ATGGTGGCTC-ATGCC----TG-T-AAT------CC----AAAC-A-C-TT-TGGGAG-GCC----GA---GTC------AG------GAAGATCGC-C-------T-------GGAG-C-C----CAGGA---GTTC-A-AGAC-CAG-CC-T--GGGCAA-T-GTG-G-CAAG-A---C-CC-TGTCTC---------------------------------
>AluJo_238
--------------------------------------------------GGCCAG--GC---GTGGTGGCTC-ACGCC----TG-T-AAT------CC----CAGC-A-C-TT-TGGGAG-GCC----GA---GGA------GG------GCAGATTGC-T-------T--------GAG-C-C----CAGGA---GTTT-G-AGAC-CAC-TCAG--GGGCAA-T-ATA-G-TAAG-A---C-CT-TGCCTC---------------------------------
>AluJo_239
------------------------------------------------------GG--GG---GCAGTTGCTC-AGGCT----TG-T-TAT------CC----CAGC-A-C-TT-TGGGAG-GCC----GA---GGC------AG------GAGGATCGC-T-------T--------GAG-T-C----CAGGA---GTTC-G-AGAC-CAG-CC-T--GGACAA-T-ATA-G-TAAG-A---C-CC-AGTCTCTACAA----------------------------
>AluJo_240
------------------------------------------------------GG--GG---GCAGTTGCTC-AGGCT----TG-T-TAT------CC----CAGC-A-C-TT-TGGAAG-GCC----GA---GGC------AG------GAGGATCGC-T-------T--------GAG-T-C----CAGGA---GTTC-G-AGAC-CAG-CC-T--GGACAA-T-ATA-G-TAAG-A---C-CC-AGTCTCTACAA----------------------------
>AluJo_241
--------------------------------------------------GGCTGT--GC---ACAGTGGCTC-ATGCC----TA-T-AAT------CC----CAGC-A-C-TT-TGGGAG-GCT----GA---TGC------AG------AAGGATCGT-T-------T--------GAG-C-C----CAGGA---GTTC-G-AGAC-CAG-CC-T--GGGCAA-C-ATA-G-TGAG-A---T-CC-CATCTCT--------------------------------
>AluJo_242
--------------------------------------------------GACTGG--GC---ACTTTGGCTC-ATGTC----TG-T-AAT------CC----TAGC-A-C-TT-TGGGAG-GCT----GA---GGC------GG------GAAGATCAC-T-------T--------GAG-C-C----CAGGA---GTTC-G-ACAC-CAG-CC-T--GGGCAA-C-ATA-G-TGAG-A---C-CC-CATCTCT--------------------------------
>AluJo_243
--------------------------------------------------GGCTGA--GC---ACAGTGGCTC-ATGCC----TG-T-AAT------CC----CAGT-A-C-TT-TAGGAG-GCT----GA---GGC------AG------GAGGATCAC-T-------T--------GGG-C-C----CAGGA---GTCT-G-AGAC-CAG-CC-T--GGGCAA-C-ATA-G-CAAG-A---T-CC-CATCTCT--------------------------------
>AluJo_244
--------------------------------------------------GACTGG--GC---ATGGTGGCTC-ATGCC----TA-T-AAT------CC----CAGC-A-C-TT-TGGGAG-GCC----GA---GG-------GG------GAGGATCCC-T-------T--------GAG-T-C----CAGGA---GTTC-A-AGAC-CAG-CA-T--GGGCAA-G-ATG-G-CGAG-A---T-CC-CATCTCTA-------------------------------
>AluJo_245
---------------------------------------------------GCTGG--GC---GTGGTGGCTC-ACACC----TG-T-AAT------CT----CAGC-A-C-TT-TAGGAG-GCC----AA---GGT------GG------GAGGATCTC-T-------T--------GAG-C-C----CAGGA---GTTC-A-AGAC-CAG-TC-T--GGCCAA-C-ATA-G-TGAG-A---C-CC-AGTCTCTA-------------------------------
>AluJo_246
--------------------------------------------------GGCAGA--GC---ATGGTGGCTC-ACGCC----TG-T-AAT------CC----CAGC-A-C-TT-TGGGAG-GCT----GA---CGC------GG------GAAGATTGC-T-------T--------AAG-C-C----CAGGA---TTTT-G-AGAC-CAG-GC-T--GGGCAA-C-ATA-G-TG-G-A---C-CC-CGTCTCTA-------------------------------
>AluJo_247
--------------------------------------------------GGCCAG--GT---GCTGGGGCTC-ACACC----TG-T-AAT------CC----CAGC-A-C-TT-TGGGAG-GCC----AA---CGT------GG------GCAGATGGC-T-------T--------GAG-C-C----CAGGA---GTTC-G-AGAC-CAG-GC-T--GGGCAA-C-ATG-G-TAAA-A-----CC-CTTCTCTA-------------------------------
>AluJo_248
--------------------------------------------------GGCCAG--GT---GCGGTGGTGC-ACACC----TA-T-AAT------CC----CAGC-A-C-TT-TGGGAG-GCC----AA---GAT------GG------AAGGATCGC-T-------T--------GAG-C-C----CAGGA---GTTT-G-AGAC-CAA-CC-T--GGGCAA-C-ATA-G-CGAG-A---C-CC-TGTCTCT--------------------------------
>AluJo_249
--------------------------------------------------GGCTGG--GC---TAGGTGGCTC-ACTCC----TG-T-CAG------CC----CAGC-A-C-TT-TGGGAG-GCC----GA---GGC------AG------GTGGATCAC-T-------T--------GAG-C-C----CAGGA---GTTC-A-AGAC-CAG-CC-T--GGGCAA-C-ACA-G-TGAA-A---C-CC-CATCTCT--------------------------------
>AluJo_250
--------------------------------------------------GGCCAG--GA---GCAGTGGCTC-GTGCC----TG-T-AAT------CC----CAGC-A-C-TT-TGGGAG-GCC----GA---AGT------GG------GAGGATCGC-T-------T--------GAG-C-C----CAGGA---ATTC-A-AGAC-AAG-CC-T--GAGCAA-C-AGA-G-TGAG-A---C-CC-CGTCTCT--------------------------------
>AluJo_251
--------------------------------------------------GGCCAG--CC---TTGGTGGCTC-ACGCC----TG-T-AAT------CC----CAGC-A-C-TT-TGGGAG-GCC----GA------------GG------------------------T--------GAG-C-C----CAGGA---TTTC-A-AGAC-CAG-CC-T--GGGCAA-T-GTA-G-TGAG-A-----CCCTGCCTCTATAAAAAATAAAA-------------------
>AluJo_252
---------------------------------------------------GCTGG--GC---TCAGTGGCTC-ATGCC----TG-T-AAT------CC----CAGC-A-C-TT-TGGGAG-GTC----GA---GGT------GG------AAGGATCAC-T-------T--------GAG-C-C----CAGGC---ATTC-G-AGAC-CAG-CC-T--GGGCAA-C-ATA-G-TGAG-A---C-CC-TGTCTCTA-------------------------------
>AluJo_253
--------------------------------------------------GGCAGG--GC---ATGGTGGCTC-ACACC----TG-T-AAT------CC----CAGC-A-C-TT-TGAGAG-GCC----GA---GGC------AA------GAGGATCAC-T-------T--------GCG-C-C----CAGGA---GTTT-G-AGAC-CAG-CC-T--GGGCAG-C-ATA-G-TAAG-A-----CC-CGTCTCTA-------------------------------
>AluJo_254
--------------------------------------------------GGGTGG--GC---ACAGTGGCTC--TGCC----TG-T-ATT------CC----CAGC-A-G-TT-TGGGAG-GCC----AA---GGT------GG------GAGGATTGC-T-------T--------GAG-C-C----CAGGA---GTTC-G-AGAC-CAG-CT-T--GGGCAA-C-ATG-G-CGAG-A---C-CC-CATCTCTA-------------------------------
>AluJo_255
---------------------------------------------------GCCAG--GT---GTGCAGGCTC-ATGCC----TC-T-AAT------CC----CAGC-A-G-TT-TGGGAG-GCT----GA---GGT------GG------GAGGATTGC-T-------T--------GAG-C-C----CAGGA---GTTC-G-AGAC-CAG-CC-T--GGGCAA-C-ATG-G-CGAG-A-----CCCCATCTCTA-------------------------------
>AluJo_256
---------------------------------------------------GCTGG--GC---ATAGTGGCTC-ATGCC----TG-T-AAT------CC----CAGC-A-C-TT-TGGGAG-GCC----AA---GGC------GG------GAGGATTGC-T-------T--------GAG-C-C----CAAAA---GTTT-G-AGAC-CAG-CC-T--GGGCAA-C-ATA-G-CAAG-A---C-CC-CATCTCTA-------------------------------
>AluJo_257
--------------------------------------------------GGCTTG--GC---ACAGTGGTTC-ATGCC----TG-T-AAT------CC----CAGC-A-C-TT-TGGGAG-GCT----GA---GGT------GG------GAGGATTGC-T-------T--------GAG-C-C----CAGGA---GTTT-G-AGAT-TAG-CT-T--TGGCAA-C-ATA-G-CAAG-A---C-CC-TCTTTCT--------------------------------
>AluJo_258
--------------------------------------------------GGCTGG--GC---ACAGTGGTTC-ACGCC----TG-T-AAT------CC----CAGC-A-C-TT-TGCGAG-GCC----AA---GGT------GG------GAGGATTGC-T-------T--------GAG-C-C----CAGGA---GTTT-G-AGAT-CAG-CC-T--GGGCAA-C-ACA-G-CAAG-A---C-TC-TTTCTCT--------------------------------
>AluJo_259
--------------------------------------------------GGCTGG--GC---ACAGTGGTTC-ACGCC----TG-T-AAT------CC----CAGC-A-C-TT-TGCGAG-GCC----AA---GGT------GG------GAGGATTGC-T-------T--------GAG-C-C----CAGGA---GTTT-G-AGAT-CAG-CC-T--GGGCAA-C-ACA-G-CAAG-A---C-TC-TTTCTCT--------------------------------
>AluJo_260
--------------------------------------------------GGCTGG--GC---ACAGTGGTTC-ACGCC----TG-T-AAT------CC----CAGC-A-C-TT-TGCGAG-GCC----AA---GGT------GG------GAGGATTGC-T-------T--------GAG-C-C----CAGGA---GTTT-G-AGAT-CAG-CC-T--GGGCAA-C-ACA-G-CAAG-A---C-TC-TTTCTCT--------------------------------
>AluJo_261
--------------------------------------------------GGCTGG--GC---ACAGTGGTTC-ACGCC----TG-T-AAT------CC----CAGC-A-C-TT-TGCGAG-GCC----AA---GGT------GG------GAGGATTGC-T-------T--------GAG-C-C----CAGGA---GTTT-G-AGAT-CAG-CC-T--GGGCAA-C-ACA-G-CAAG-A---C-TC-TTTCTCT--------------------------------
>AluJo_262
--------------------------------------------------GGCTGG--GC---ACAGTGGTTC-ATGCC----TG-T-AAT------CC----CAGC-A-C-TT-TGCGAG-GCC----AA---GGT------GG------GAGGATTGC-T-------T--------GAG-C-C----CAGGA---GTTT-G-AGAT-CAG-CC-T--GGGCAA-C-ATA-G-CAAG-A---C-TC-TTTCTCT--------------------------------
>AluJo_263
--------------------------------------------------GGCTGG--GC---ACAGTGGTTC-ATGCC----TG-T-AAT------CC----CAGC-A-C-TT-TGCGAG-GCC----AA---GGT------GG------GAGGATTGC-T-------T--------GAG-C-C----CAGGA---GTTT-G-AGAT-CAG-CC-T--GGGCAA-C-ATA-G-CAAG-A---C-TC-TTTCTCT--------------------------------
>AluJo_264
--------------------------------------------------GGCTGG--GC---ACAGTGGTTC-ACGCC----TG-T-AAT------CC----CAGC-A-C-TT-TGCGAG-GCC----AA---GGT------GG------GAGGATTGC-T-------T--------GAG-C-C----CAGGA---GTTT-G-AGAT-CAG-CC-T--GGGCAA-C-ATA-G-CAAG-A---C-TC-TTTCTCT--------------------------------
>AluJo_265
--------------------------------------------------GGCTGG--GC---ACAGTGGTTC-ACGCC----TG-T-AAT------CC----CAGC-A-C-TT-TGCGAG-GCC----AA---GGT------GG------GAGGATTGC-T-------T--------GAG-C-C----CAGGA---GTTT-G-AGAT-CAG-CC-T--GGGCAA-C-ATA-G-CAAG-A---C-TC-TTTCTCT--------------------------------
>AluJo_266
--------------------------------------------------GGCTGG--GC---ACAGTGGTTC-ACGCC----TG-T-AAT------CC----CAGC-A-C-TT-TGCGAG-GCC----AA---GGT------GG------GAGGATTGC-T-------T--------GAG-C-C----CAGGA---GTTT-G-AGAT-CAG-CC-T--GGGCAA-C-ATA-G-CAAG-A---C-TC-TTTCTCT--------------------------------
>AluJo_267
--------------------------------------------------GGCCAG--GT---GCAGTGGCTC-ACACC----TG-T-AAT------CC----CAGC-A-T-TT-TGGGAG-GCC----AA---GGT------GG------GAAGATCGC-T-------T--------GAG-C-C----CAGGA---GTTC-G-AGAC-TGG-CC-T--GGGCAA-C-ATA-G-TGAG-A---C-CC-TGTCTCT--------------------------------
>AluJo_268
--------------------------------------------------GGCCAG--AT---ATGGTGGCTC-ACGCC----TG-C-AAT------CC----CAGC-A-C-TT-TGAGAG-GCG----GA---GGT------GG------GAGGATCGC-T-------T--------GAG-C-C----CAGGA---GTTC-G-AGAC-CAA-CC-T--GGGCAA-C-ATA-G-TGAG-A---C-CC-TGTCTCT--------------------------------
>AluJo_269
--------------------------------------------------GGCCGG--GC---GCAGTGGCTC-ACGCC----TG-T-AAT------CC----CAGC-A-C-TT-CGGGAG-GCC----AA---GGT------GG------AGGGATCAC-T-------T--------GAG-T-C----CAGGA---GTTT-G-AGAC-CAG-CC-T--GGGCAA-C-ATA-C-TGAG-A---C-TC-CGTCTCT--------------------------------
>AluJo_270
--------------------------------------------------GGCCAG--GC---ATGGT-GCTC-ATGCC----TG-T-AAT------CC----CAGC-A-C-TT-TGGGAG-CCC----GA---GGC------AG------GTGGATTAC-T-------T--------GAG-C-C----CAGGA---GTTT-G-AGAC-CAG-CC-T--TGGCAA-T-ATA-G-TGAG-A---C-CC-CATCTCTA-------------------------------
>AluJo_271
---------------------------------------------------GCTGG--GC---ACGGTAACTT-ACGCC----TG-T-AAT------CC----CAGC-A-C-TT-TGGGAG-GCC----AA---GGC------AG------GAGGATCGC-T-------T--------GAG-C-C----CAGGA---GTTT-G-AGAC-CAG-CC-T--GGGCAA-C-ACA-G-CAAG-A---C-CC-CATCTCTA-------------------------------
>AluJo_272
---------------------------------------------------GCCAG--GC---ACGGTGGCTC-ACGCC----TG-T-AAT------TC----CAGC-A-C-TT-TGGAAG-GCC----GG---GGT------GG------GTGGATCGC-T-------T--------GAG-C-C----CAGGA---GTTC-A-AGAC-CAG-CC-T--GGGCAA-C-ATA-G-TGAG-A---C-CC-CAGCTCTA-------------------------------
>AluJo_273
--------------------------------------------------GGCCGG--GT---GCGGTGGCTC-ATGCC----TG-T-CAA------CC----CAGC-A-C-TT-TGGGAG-GCT----GA---GGC------AG------GAGGATCTC-T-------T--------GAG-C-C----CAGGA---GTTT-G-AGAC-CAG-CC-T--GGGCAA-C-ACA-G-TGAG-G---C-CC-CGTCTCT--------------------------------
>AluJo_274
------------------------------------------------------GG--GC---ACGGTGGCTC-ATGCC----TG-T-AAT------CC----CAGC-A-C-TT-TGGGAG-GCC----AA---GGC------AG------GAGGATCAC-T-------T--------GAG-C-C----CAGGATGGGTTT-G-AGAC-CAG-CC-T--GGGCAA-C-ATG-G-TGAG-A---A-CC-CATCTCTA-------------------------------
>AluJo_275
--------------------------------------------------GGCCAG--TT---GCGGTGGCTC-ACGCC----TG-T-AAT------CC----CAGC-A-C-TT-TGAGAG-GTC----AA---GGC------GG------GAGGATCGC-T-------T--------GAG-C-C----CAGGA---GTTT-G-AGAC-CAG-CC-T--GGGCAA-C-ATA-G-CGAG-A---C-CC-AGTCTCT--------------------------------
>AluJo_276
--------------------------------------------------GGCCGG--GC---AAGGTGGCTC-ATGCC----TC-T-AAT------CC----CAGC-A-C-TT-TGGGAG-GCC----GA---GGC------GG------GAGGATCGC-T-------T--------GAG-C-C----CAGAA---GTTC-A-AGAC-CAG-CC-T--GGGCAA-C-ACA-G-TGAG-A---C-CC-CATCTCT--------------------------------
>AluJo_277
--------------------------------------------------GGCCAG--GT---GTGGTGGCTC-ACAAC----TG-T-AAT------AC----CAAA-A-C-TT-TAGGAA-ATA---------GGT------AG------AAGGCTTGCAT--------------------C------CACGA---GGTT-G-AGAC-CAG-TC-T--GGGCAA-C-ATA-G-CAAC-A----TCC-CATCGCTACAAAA--------------------------
>AluJo_278
----------------------------GTCTTTAAAGATACAAAGAGGGAGCCGG--AT---GTGATGGCTC-ATGCC----TG-T-TGT------CC----CAGC-T-A-CT-GGGGAT-GCC----GA---GGT------GG------GAGGACTGA-T-------T--------GAG-C-C----CAATA---GTTC-A-AGGC------------------T-TCA-G-TTAG-C-----------------------------------------------
>AluJo_279
--------------------------------------------------GGCTGG--GC---ATGGTGGCTT-ACACC----AG-T-AAT------CC----CAGT-C-A--T-TGAAGG-GCC----AA---GAT------GG------GAGGATTGC-T-------T--------TCA-C-T----CAGGA---GTTT-G-AACC-CAG-CC-T--AGGCAA-C-AAA-G-GAAG-A----CTC-CATCTATA-------------------------------
>AluJo_280
--------------------------------------------------GGCTGG--GC---ATGGTGGCTT-ACACC----AG-T-AAT------CC----CAGT-C-A--T-TGAAGG-GCC----AA---GAT------GG------GAGGATTGC-T-------T--------GCA-C-T----CAGGA---GTTT-G-AATC-CAG-CC-T--AGGCAA-C-AAA-G-GAAG-A----CCC-CATCTATA-------------------------------
>AluJo_281
----------------------------------------------------------------------------GCC----CA-T-AGT------GC----CAGC-T-A-CC-TTGGAG-GCT----GA---GGC------CG------GAGGGTCCC-C-------A--------GAG-C-C----CCGGA---GTTT-G-AGTC-TAG-TG-T--GGGCAA-T-ATA-G-TGAG-A----CCC-TGTCTCCTAAAAAAAATACATAATTTA------------
>AluJo_282
--------------------------------------------------GGTCAG--GC---ATGGTGGTTC-ATACC----TG-T-AAT------CC----TAAC-A-A-GT-TGAGAG-GCC----AA---GGC------AG------GAGGAATGC-T-------T--------GAG-T-C----TGGGA---GTTG-G-AAAT-CAG-CC-T--GGGGAG-G-GTA-G-AAAG-A----TCC-CATCTCT--------------------------------
>AluJo_283
--------------------------------------------------GGTTGG--GG---GTGGTAACTC-ACGCC----TA-A-AAT------CC----CAAC-A-C-TT-TAGGAG-GCT----GA---CAC------AG------GTGGACTGC-T-------T--------GAG-C-T----CAAGA---GTTC-A-GGAC-CAG-CC-T--GGGCCA-C-AGG-G-AAAA-A----CCT-CATCTCT--------------------------------
>AluJo_284
--------------------------------------------------GGCCAG--GT---ATGATGACTT-ACACC----TA-T-AAT------CC----CAAC-A-C-TT-TGGGAG-ACC----AA---AGC------AG------GAGAATCAT-T-------T--------GAG---A------------GTTT-G-AGAC-CAA-TC-T--GAGCAA-C-ATA-G-TGAG-A-----CCCCATATCTACCAAA--------------------------
>AluJo_285
--------------------------------------------------GGCCTG--GT---GCAGTGGTTT-ACGCC----TG-T-AAT------CC----CAGA-G-C-TT-TGGGAG-GCC----GA---AGT------GA------GAGAATCAC-T-------T--------GAG-C-C----TAGGA---TTTC-A-AGCC-CAG----------CAA-C-ATA-G-CAAG-A----TTC-CGTCTCCACAAAA--------------------------
>AluJo_286
--------------------------------------------------GGCCAG--AT---GCAGTGGCTC-AAGCC----TG-T-AAT------CC----CAGC-A-T-TT-TACGAG-GCC----GA---GGT------GG------GTAGATCGT-T-------C--------GAG-C-C----CAGAG---GTT--G-AGAC-CAA-CC-T--GGGCAA-C-ATG-G-CGAA-A----TTC-CATCTCTA-------------------------------
>AluJo_287
---------------------------------------------------GCTGT--GT---GCTGTGACTC-ACTCT----TG-T-AAT------CC----CATT-A-C-TT-TGGGAG-GCT----GA---GTC------AG------GAGATTAAC-T-------T--------GAG-C-C----CAGGA---ATTC-A-AGAC-CAG-CC-T--TGACAA-C-ATA-C-GGAG-A----CCC-CATCTCTA-------------------------------
>AluJo_288
--------------------------------------------------GGACAG--GT---GTGGTGGCTC-AAACC----TG-T-AAT------CC----CAGT-A-C--T-TGGGAA-GTC----AA---GGT------GG------GTGGATTCC-T-------T--------GAG-C-C----AAAGG---GTTT-G-AGAC-CAA-CC-T--GGGCAA-C-ACA-G-CAAT-A----CCG-TATCTCTA-------------------------------
>AluJo_289
--------------------------------------------------GGCCGG--GC---ACAGTGGTTC-ACACC----AG-T-AAT------GC----CAGC-A-C-AT-TGAGAG-GAT----GA---GGT------GG------GAAGACCAG-T-------T--------GAG-C-C----CAGGA---ATTC-G-AGAC-CAG-TC-T--GGGCAA-C-ATG-G-TAAG-A----CCC-TCTTTCT--------------------------------
>AluJo_290
--------------------------------------------------GGCAGG--AT---GTGATGGCTA-ACACC----TG-T-AAT------CT----CAGC-A-C-TT-TGGGA--------------GGT------GA------GAGAATCTC-C-------T--------GAG-C-C----CAGGA---GTTT-G-AGGC-CAG-CC-T--GAGCAA-------G-AGAA-A----CCC-TAGCTCTACAATAAATA----------------------
>AluJo_291
--------------------------------------------------GGCTGG--GT---GTAGTGGTGC-ATACC----TA-T-AAG------CC----CAGC-A-C-TT-CGAGAG-GCC----GA---GGC------AG------GAGGAACCC-T-------T--------GAG-C-C----CAGGA---GTTT-G-AGGA-TAG-CC-T--GGGCAA-C-ATA-G-CTAG-G----TTC-TGTCTCT--------------------------------
>AluJo_292
--------------------------------------------------GGCCAG--GT---GCAGCGCCTC-ACGCG----CA-C-AAT------CC----CAGC-A-C-TT-TGGGAG-GCT----GA---GAA------GG------GTGGATTGC-T-------T--------GAG-C-C----CAGGC---GTTC-G-AGAC-CTG-CC-T--GGGCAA-C-ATA-A-CAAA-A-----CC-TGTCTTTA-------------------------------
>AluJo_293
--------------------------------------------------GGCCAG--GT---GCAGCGCCTC-ACGCG----CA-C-AAT------CC----CAGC-A-C-TT-TGGGAG-GCT----GA---GAA------GG------GTGGATTGC-T-------T--------GAG-C-C----CAGGC---GTTC-G-AGAC-CTG-CC-T--GGGCAA-C-ATA-A-CAAA-A-----CC-TGTCTTTA-------------------------------
>AluJo_294
---------------------------------------------------GCCAG--GT---GCGATTGTTT-ATGCC----TG-T-AAT------AT----TGGC-A-C-TT-AGAGAA-GCT----GA---GAT------GG------GAGGATCAC-T-------T--------GAG-C-C----CAGGA---ATTC-G-AGAC-CAG-CC-T--GGGCAA-C-ATA-G-CAAG-A----ACA-CATCTCTA-------------------------------
>AluJo_295
--------------------------------------------------GGTCAG--AT---ACAGTGGCTT-ACACC----TA-A-AAT------TC----CAAA-A-C-TT-TGGGAG-GCC----AA---GGT------GG------GTGGATCAC-T-------T--------GAG-C-C----CAAGA---GTTT-G-AGAC-CAG-CC-C--GGGCAA-C-ACA-G-TGAG-----CCCT-CATCTCT--------------------------------
>AluJo_296
--------------------------------------------------GGCTGG--GT---ATGGTGACTC-ACAGC----TG-C-CAT------CC----CAGC-A-C-TT-CAGGAG-GCT----GG---GAC------AG------GAGGATCGT-T-------T--------GGC-T-C----CAGGA---GTTC-A-GGAC-CAG-AC-T--GGGCAA-C-ATA-G-TGAG-A----TCA-CATCTCT--------------------------------
>AluJo_297
--------------------------------------------------GGCCAG--GT---GCAATCACTC-ACACC----TG-T-GAT------GC----CAGC-A-C--T-TGGGAG-GCC----AA---GGC------AG------GAAGATTGT-T-------T--------GAC-C-C----AAGGG---GTTT-G-AGAC-CAG-CC-T--GGGCAA-C-ATA-G-CAGA-A----CCC-TATCTCTA-------------------------------
>AluJo_298
---------------------------------------------------GCTGG--GC---AAGGTGGTTC-ACACC----TG-A-AAT------CC----CAGA-A-A-TT-TGGGAG-ACT----GA---GAT------GA------GAGGATCGC-T-------T--------GAG-C-T----CAGGA---GTTT-G-AGAC-CAG-CT-T--GGGCAA-C-ATA-C-CGAA-A----CCC-TATCTTTA-------------------------------
>AluJo_299
--------------------------------------------------GGCTAG--GC---ATGGTAACTT-ATGCC----TG-T-AAT------CT-----AGC-A-T-TT-TGGGTG-GCT----GA---GGT------GG------ATAGATCTC-T-------T--------AAG-C-C----CAGGA---GTTC-A-AGGC-CAC-CC-T--GGGCAA-C-AGA-G-TGAG-A----CCC-CCTCTCTA-------------------------------
>AluJo_300
--------------------------------------------------GGCTGG--GT---GCAGTGGCTC-AGACC----TG-T-AAT------CT----CAAC-A-C-TT-TTGGAG-GCT----GA---GGC------AG------GAGGATTTC-T-------T--------GAG-T-C----TAGGA---CTTG-G-AGAC-CAG-CC-T--GAGCAA-C-AAA-C-TGCA-A----TCC-TGTCTCT--------------------------------
>AluJo_301
--------------------------------------------------GGCTGG--GT---GCAGTGGCTC-AGACC----TG-T-AAT------CT----CAAC-A-C-TT-TTGGAG-GCT----GA---GGC------AG------GAGGATTTC-T-------T--------GAG-T-C----TAGGA---CTTG-G-AGAC-CAG-CC-T--GAGCAA-C-AAA-C-TGCA-A----TCC-TGTCTCT--------------------------------
>AluJo_302
---------------------------------------------------GCTGG--GT---GCAGTGGGTC-ACGAC----CA-T-AGT------CT----CAGC-A-C-TT-TGGGAG-GCC----AA---AGC------AG------AAAGATCGT-T-------T--------GAG-C-C----CCGGA---GCTC-G-ACAC-CAG-GC-T--GGGCAA-C-ATA-G-CAAG-A----CCC-TGTCTCTA-------------------------------
>AluJo_303
--------------------------------------------------GGCCGG--GA---GCCATGGCGT-ATGCC----TG-T-AAT------CC----CAGC-A-C-TT-TGAGAG-GCT----GA---GGT------GG------GTTGATTGC-T-------T--------GAG-T------ATGGA---GTTC-A-AGAC-CAG-CT-T--GGGGAA-C-ATA-G-CAAG-A----CTC-AGTCTCTA-------------------------------
>AluJo_304
--------------------------------------------------GGCCAA--GT---GCAGTGGCTC-ACGCC----TG-T-CAT------CC----TAGC-A-C-TT-TAGGTG-TCT----GA---AGT------GG------GAGGGCCCT---------T--------GAG-C-C----AAGGA---GTTT-G-AGAC-CAG-CC-T--GGGCCA-C-ATA-A-GGAG-A-----CCTCACCTCTA-------------------------------
>AluJo_305
--------------------------------------------------GGTTGG--GT---GCAGTCACTC-ACGTG----TA-T-AAT------CC----CAGC-A-T-TT-TGGGAG-GCC----AA---GGT------GG------GAGGA----------------------GGG-T-T------GGA---GTTC-A-AGAT-CAG-CC-T--GGGCAA-C-ATA-G-CAAG-A---CCCC-CATCTCTACGAAGA-------------------------
>AluJo_306
--------------------------------------------------GGCTGT--GC---TCAGTGGCTC-ACACT----TG-T-AAT------GC----CAAC-A-C-TT-TGGGAA-GAC----TA---GGC------AG------AAGGACTAC-T-------T--------GAG-C-C----CAAGA---GTTT-G-AGAC-CAG-CC-T--AGGCAA-C-ATA-G-AGAG-A----CCT-CGTTTCT--------------------------------
>AluJo_307
--------------------------------------------------GGCCGG--GC---ACAGTGGTTC-ACACC----TG-T-AGT------CC----CAGT-G-C-TT-TTGGAG-GCC----AA---GGC------AG------GAGTATGGT-T-------T--------GAA-C-T----CAGGA---ATTT-G-AGAC-CAG-CC-------------ATA-G-TGAG-A---TCCC-AATCTCTACAGAAA-------------------------
>AluJo_308
---------------------------------------------------GCTGG--GT---GCAGTGGCTC-ACGCC----TG-T-AAT------CC----CAGC-A-C-TT-TGGTAG-GCT----GA---GAT------AA------AAGAATCGC-T-------T--------GAG-C-C----TGGTA---GTTC-A-ATAC-CAG-CC-T--GGGCAC-A-CCA-G-TGAG-A----TTC-TGTCTCTA-------------------------------
>AluJo_309
---------------------------------------------------GTTGG--GT---GCGGTGGCTC-ACGGC----TG-T-AAT------CC----CAGC-A-C-TT-TGGTAG-GCC----GA---GAT------AG------AAGAATTGC-T-------T--------GAG-C-C----CGGTA---GTTC-A-ATAC-CAG-CC-T--GGGCAA-A-CCA-G-TGAG-A----TTC-TGTCTCTA-------------------------------
>AluJo_310
---------------------------------------------------GCTGA--AC---ACAATGGTTC-CCACC----TG-T-GAT------CT----CAGC-A-C-TT-TGGGTG-CCT----CA---GGT------AG------GTGGATCAC-T-------T--------GAG-C-C----CAGGA---GTTT-G-AGAC-CAG-CC-T--GAGCAA-C-ACA-G-TAAG-A----TCT-CATCTCTA-------------------------------
>AluJo_311
--------------------------------------------------GGCCAG--GT---GCAGTGACTC-ACATC----TG-T-AAT------CC----CAGC-C-C-TT-TGGGAG-GCC----GA---GGT------GG------GCGGATTGC-T-------T--------GAG-C-T----CAGGC---ACTT-G-AGAC-CAG-CC-G--GGGCAA-T-ACA-G-CAGA-A----CCC-CATCTCT--------------------------------
>AluJo_312
---------------------------------------------------GCTGG--GT---ACAGTGGCTC-ACACC----TG-T-AAT------CC----TAGC-A-T-TT-TGAGAG-GCC----GA---GGT------AG------GAGGACTGT-T-------T--------GAA-C-C----CTGGA---GTTT-G-AGAC-TAA-CC-A--GGGCAA-C-AGA-G-CAAG-A----TTC-TGTCTCTA-------------------------------
>AluJo_313
--------------------------------------------------GGCTGG--GT---ACGGTGGCTC-ACACT----TA-T-AAT------CC----TAGT-G-C-TT-TGGGAG-GTT----GA---TGT------GA------GAGGATCAC-T-------T--------GAG-C-T----CAGGA---ATTT-G-AGAC-CAA-TG-G--GGGCAA-C-ATA-G-TGAG-A----CCT-TCTCTCT--------------------------------
>AluJo_314
---------------------------------------------------GCAGG--GA---ATGGTGGTTC-ATGTG----TG-T-AAT------CT----CAAC-A-C-TT-TGGGAA-GCT----GA---GGT------GG------GAGGATGAC-T-------T--------GAG-C-T----CAGGA---GTTC-T-GCAC-CAG-AC-T--GGGCAA-C-AAA-G-CGAG-A----CCC-CATCTCTA-------------------------------
>AluJo_315
--------------------------------------------------GACCAG--GC---ACTGTGCCTC-ATGCC----TG-T-AAT------CT----CAGC-A-C-TT-TGGGAG-GCA----GA---GGT------TG------GGGGACTGC-T-------T--------TAC-C-T-----TGGA---GTTG-G-AGAC-CAC-AC-T--GGGCAA-C-ACA-G-TGAG-A----CCC-TGCCTCTA-------------------------------
>AluJo_316
---------------------------------------------------------------GTGGTAGCTC-ATGCC----TA-T-AAT------CC----CAGC-T-C-TT-TGGTAG-GCC----AA---GGT------TG------GAGGACTGC-T-------T--------GAA-C-T----CAGGA---ATTT-G-AGGC-TAG-CC-T--GGGGAA-C-ACA-G-TGAG-A----TCC-TGTTTCTATAAAAAG------------------------
>AluJo_317
---------------------------------------------------GCCAG--GC---ATAGTGGCTC-ACACC----TG-C-AAT------CC----CAGA-A-C-TT-TGGGAG-GTA----GA---GGT------GG------AAGGATTAT-T-------T--------GAG-T-C----CAGGA---GTTC-A-AGGC-CAG-CC-T--GGGCAA-C-AGA-G-CAAG-A----CCC-CGCCTCTA-------------------------------
>AluJo_318
---------------------------------------------------GCCAG--GA---GCAGTGGCTC-ACACC----TG-T-AGC------CC----CAGC-A-T-GT-TGGGAG-ACC----CA---GGC------AG------GAGGATTGT-G-------C--------AAA-C-C----CAGGA---GTTT-G-AAAC-CAG-CC-T--GGGCAA-C-AAA-G-TGAG-A----CCC-TGTCTCTA-------------------------------
>AluJo_319
--------------------------------------------------GGCTGG--GC---ATGGTAGCTC-ATACC----TG-G-AAT------CC----TAGC-A-C-TT-TGGGAA-GCT----GA---ATG------GG------GAGGATCAC-T-------T--------GAG-C-C----CAGGA---GTTA-G-AGAC-CAG-CC-T--GGGCAA-C-ATT-G-CAAG-A----GCT-CATCTTT--------------------------------
>AluJo_320
--------------------------------------------------GGCCAA--GT---GCAGTAGTTC-ACACC----TG-T-AAT------CC----CAGC-A-C-TTGTGGAAG-GCT----GA---GGC------AG------GCAGATGAC-T-------T--------GAG-C-T----CAGGA---GTTT-G-AGAC-CAG-TC-T--GGGTAA-C-ATG-G-CAAG-A-----CC-TGTCTTT--------------------------------
>AluJo_321
--------------------------------------------------GACTGA--GT---GTGGTGGCTC-ACACC----TG-T-AAT------CC----CAGC-A-C-TT-TGGAAG-GCT----GA---GGC------AG------GCAAGTTGC-T-------T--------TAG-C-C----CAGGG---GTTT-G-AAAC-CAA-CC-T--GGGCAA-C-ATA-G-CAAG-A----CTC-CATGTCT--------------------------------
>AluJo_322
----------------------------------------------------CCAG--GC---ATGGTGACTC-ATGCC----TG-TTAAT------CC----CAGC-A-C-TT-TGGGGG-GCT----GA---GGC------TT------CAGGATGTC-T-------T--------GAG-C-C----CAGGA---GATT-G-ATAC-CAG-CC-T--GGGCCA-C-AGA-G-CAAG-A----CCT-TGTCTCTA-------------------------------
>AluJo_323
----------------------------------------------------CTGC--GT---GTGGTGGATC-ACGCC----TG-T-AAT------CC----CAGC-A-C-TT-TGGGAA-GCT----TA---GGC------GA------GAGGATCAC-T-------T--------GAA-T-C----CAGGA---GTTT-G-AGAC-AAG-GC-T--GGGCAGCC-ATA-G-CCAG-A----CCC-TGTTTCTA-------------------------------
>AluJo_324
--------------------------------------------------GGCTGG--GC---ACAGTGGCTC-ACACT----TG-T-AAT------CC----CAGT-A-C-TT-TGTGGG-GCT----CA---GGT------GG------GAGGATTGC-T-------T--------CAA-C-C----CAGGA---GTTC-A-AGAC-CAG-CA-T--GGGCAA-C-ACA-G-TAAG-A---ACCC-AATTTC---------------------------------
>AluJo_325
--------------------------------------------------GGCTGG--GC---ATGGTGGCTC-ATGCC----AG-T-AAT------TC----CAGG-A-T-TT-GGGGAG-ACT----GA---GGC------AG------GAAGATGCC-T-------T--------GAG-C-T----CAGGA---GTTTTG-AGAC-CAG-CC-T--AGGTGA-C-ATA-G-GAAG-A----CCT-TGTCTC---------------------------------
>AluJo_326
------------------------------------------------------GG--GT---GCAGTGGCTT-ATGCC----TA-T-AAT------CT----TAGC-A---GT-TTGGGG-GCT----GA------------AG------CAGGACCTC-T-------T--------GAG-C-C----CAGGA---ATTC-C-AGAC-CAG-CC-T--GGGCAA-C-ATA-G-CAAG-A-----CCCTATCACCACAAAAAA------------------------
>AluJo_327
--------------------------------------------------GGCCAC--AC---TTGGTGGTTC-TTGCC----TG-T-AAC------TT----TAGC-A-C-TT-TGGGAG-GCT----TA---GGC------AG------GCAGATTGC-T-------T--------GAG-C-C----CAGGA---GTTC-A-AGAC-CAG-CC-T--GGACAG-C-ATA-G-TGAG-A---TACC-CATCTC---------------------------------
>AluJo_328
--------------------------------------------------GGCTGG--GC---GCAGTGGCCC-ACACC----TG-T-AAG------CC----CAAC-A-C-TT-TGAGAG-GCC----AG---GGT------GG------GAGGACCAC-T-------T--------GAA-C-C----CAGGA---GTTC-A-AGAT-CAG-CC-T--AGGCAA-C-ATA-G-TGAG-A----TAC-CATCTCT--------------------------------
>AluJo_329
--------------------------------------------------GGCTGG--GT---GCAGTGGCTC-ATGTC----TG-C-AAT------AC----TGTC-A-C-TT-TGGGAG-GCC----AA---GGC------AA------GAGGATTGC-T-------T--------GAG-C-T----CAGGA---GTTC-A-AGAC-TAC-CC-T--GGGCAA-C-ATA-G-TGAG-A----CCT-CGTTTCT--------------------------------
>AluJo_330
--------------------------------------------------GGTCAG--GC---TTGGAAGCTC-ACACT----CA-T-AAT------CC----TAGC-A-C-AT-TTGGAG-GCT----GA---GGC------AG------AAGGATTGC-T-------T--------GAG-C-T----CAGGA---TTCT-G-AGAC-CAG-CC-T--GGCCAA-C-ATA-G-CAAG-A----CTT-CATCTCT--------------------------------
>AluJo_331
-------------------------------------------------------------------TAGCTC-ATGCC----TG-T-AAT------CC----CAGC-A-T-TT-TGGGAG-GCC----AA---AGA------TG------GAGAATTGC-T-------T--------GAG-C------CAGGA---GTTT-G-AGAC-CAG-CC-T--AGGCAT-C-ATA-G-GGAG-A-----------CTCTACACAAGCACACAAGCACG-------------
>AluJo_332
--------------------------------------------------GGCTGG--GC---GCAGTGGCTC-ACAAG----TG-T-AAC------TC----CAGC-A-C-TT-TGGGAG-GCT----GA---GGC------AG------GAAGACTGC-T-------T--------AAG-C-C----CAGGA---GTTG-G-AGAC-CAG-CC-T--GGGCAA-C-ACA-G-CAAG-A----CCT-TGTCTCT--------------------------------
>AluJo_333
--------------------------------------------------GGCTGG--GC---GCAGTGGCTC-ATTCT----TA-T-AAT------CC----CAGC-A-C-TT-TGGGAG-GCC----GA---GGT------GG------GAAG-TCGC-T-------T--------GAG-C-C----CAGGA---GTTA-G-AGAC-TGG-CC-G--GGGCAG-T-ATA-T-CGAA-A----CCT-CATTTCTA-------------------------------
>AluJo_334
--------------------------------------------------GGCTAG--AC---ATGGTGGCTC-ATGCC----TG-T-AAT------CC----CAGC-A-C-TT-TGTGGG-GGT----GA---AGG------GG------GATGCTTAC-T-------T--------GAG-T-C----CAGGA---GTTT-G-AGAC-CAG-TC-T--GGGCAA-T-ATA-A-TGAG-A----CCT-TGTCTCT--------------------------------
>AluJo_335
--------------------------------------------------GGCCAG--GT---GCCGTGGTTC-CTGCC----TA-T-AAT------CC----CAGC-A-C-TT-TGGGAG-GCT----GA---GAT------GG------GAGGATCCC---------C--------CAG-C-C----CAGGA---ATTT-A-AGAC-CAC-CT-T--GGGTAA-T-ATA-G-GGAG-A----CCC-CATCTCTA-------------------------------
>AluJo_336
--------------------------------------------------GGCCAG--GT---GCCGTGGTTC-CTGCC----TA-T-AAT------CC----CAGC-A-C-TT-TGGGAG-GCT----GA---GAT------GG------GAGGATCCC---------C--------CAG-C-C----CAGGA---ATTT-A-AGAC-CAC-CT-T--GGGTAA-T-ATA-G-GGAG-A----CCC-CATCTCTA-------------------------------
>AluJo_337
--------------------------------------------------GGCAGG--GC---ACAATGGCGC-ATGTG----TG-T-AAT------CC----TAGC-A-C-TT-TGGGAG-GCC----AA---AGC------AG------GAGGATCAC-T-------G--------GAG-C-T----CAGGG---GTTT-A-AGAC-CAG-CC-T--GGGAAA-C-ATA-G-GGAG------CTT-GGTCTCTA-------------------------------
>AluJo_338
--------------------------------------------------GGCTGG--GC---ACGGTGGTTC-ATGCC----TG-T-AGT------CC----TAAT-G-C-TT-TGGGAA-GCT----GA---GGC-------G------GGTGGTTGC-T-------T--------GAG-T-C----TAGGA---GTTC-G-AGAC-CAG-CC-T--CGTCAA-C-ATA-G-TGAG-A-----CCCTGTCTCTA-------------------------------
>AluJo_339
--------------------------------------------------GACTGG--GC---ATGATGGCTC-ATGCA----TG-T-AAT------CC----CAGT-A-C-TT-TGGGAG-GCC----AA---GGC------AG------GAGGACTGC-T-------T--------AAG-C-T----AAGGA---GTTT-G-AGAC-AAG-GC-T--AGGTAA-C-ATA-A-TGAG-A----CCC-TGGCTCT--------------------------------
>AluJo_340
---------------------------------------------------GCCAG--GT---GTGGTGGCTC-AAGTC----CG-T-AAT------CC----CAGC-A-G-CT-GGGGAG-GCC----GA---AGT------GG------GCAGATTGC-T-------T--------GCC-C-C----CAAGA---GTTT-G-AGAC-CAG-CC-T--GGGTAA-C-ATA-G-TGAA-A----CCC-TGTCTCTA-------------------------------
>AluJo_341
--------------------------------------------------GGCCAG--GC---ATGGTGGCTC-ATGCC----TG-T-AAT------CT----CAGG-A---TC-TGGGGAAGCT----GA---GGA-----AGG------GAAGATTGC-T-------T--------GAG-T-C----CAGGA---GTTC-A-AGAC-CAG-CT-T--GGACAG-C-ACA-G-TGAA-A-----CCTTGTCTC---------------------------------
>AluJo_342
---------------------------------------------------GCCAG--GT---TTGGTGGTTC-ACGCC----TG-T-AAC------CC----CAGC-A-C-TC-TGGGAG-GCT----GA---GGT------GG------TAGGATCGC-T-------T--------GAG-C-T----CAGGA---GTCC-G-AGAC-CTG-CC-T--GGGAAA-C-ATA-G-CAAG-A----CCC-CAGCTCTA-------------------------------
>AluJo_343
--------------------------------------------------GGCTGG--AC---ACACTGGCTC-ATGCC----TG-T-AAT------CC----CAAC-A-C-TT-TGGGAG-GCA----AG---GAC------AG------GAGGATTGT-T-------C--------AAC-C-C----CAG----------G-AGAC-CAG-CC-T--GAGCAA-C-ACA-G-TAAA-A----CAC-CATCTCTACCAAA--------------------------
>AluJo_344
--------------------------------------------------GGCTGG--GT---GTGGTGGCTC-ATGCC----TG-C-AAT------CC----CAGT-A-C-TT-TGGGAG-GCT----GG---GGT------GG------GAGGATCAT-T-------T--------GAG-C-C----CAGAA---TCTT-G-AGAC-CAC-CC-T--GGGCAG-C-CTC-G-CAAG-A----CCC-TATCTCT--------------------------------
>AluJo_345
--------------------------------------------------GGTTGG--GT---GCAGTGGCTC-ATGCT----TG-T-AAT------CC----CAAC-A-C-TT-TGGTTA-AGT----GA---GAC------AG------TAGAATTGC-T-------T--------GAG-C-C----CAGGA---GTTC-A-AGGC-CAG-CC-T--GGGCAA-C-ATT-G-TAAG-A----CCC-CATCTCT--------------------------------
>AluJo_346
--------------------------------------------------GGCCAG--GT---GCAGTGGCTC-ACGTG----TG-T-AGT------CC----CAAC-A-C-TT-TGGGAG-GCC----AA---GGC------GG------GAGGATTAT-T-------T--------GAG-C-A----CAGGA---GTTT-G-AGAC-TAG-CC-T------------------AAG-A----CTC-TGTCTGTACAAAAAAACAA--------------------
>AluJo_347
---------------------------------------------------GCCAA--GC---ATGGTGGCTC-ACAAC----TT-AAAAT------CC----CAGC-A-C-TT-TGGGAG-GCT----GA---GGT------GG------GAGGATTGC-T-------T--------GAA-C-C----CAGGT---GTTC-C-AGAC-TAG-CC-T--GGGCTA-C-ATA-G-TGGG-A---CGCC-CCCCTC---------------------------------
>AluJo_348
---------------------------------------------------GCCAG--AT---GTGTTGGCTC-ACACT----TG-T-AAT------CC----CAGT-A-C-TT-CGGGAG-GCT----GA---AGC------AG------GAAGACTGC-A-------T--------GAG-C-C----CAGGA---GTTT-A-AGAC-CAG-CC-T--GAGCAA-C-ATA-G-CAAA-A----TGC-AGTCTCTA-------------------------------
>AluJo_349
--------------------------------------------------GGCAGA--GC---GCAGTGGTTC-ACATC----TG-T-AAT------CC----CAGT-G-C-TT-TGGGAG-GCT----GA---GGT------AG------GTGGATCGC-T-------T--------GGG-C-C----CAGGA---GTTC-A-AGAC-CAG-CC-T--GGGCAG-C-ATA-G-CGAG-A----CCC-TGTTTTT--------------------------------
>AluJo_350
---------------------------------------------------GTCGG--GC---AT-GTGGCTC-ATGCC----TG-A-AAT------CC----TAGG-A-C-TT-TGGGAG-GCT----GA---GGC------AG------GTGGATTGCTT-------T--------GAG-C-T----CAAGA---GTTT-C-AGAC-CAG-CC-T--GGCCAA-C-ATA-A-CGAA-A----ACT-CATCTCTA-------------------------------
>AluJo_351
--------------------------------------------------GGCCGG--GC---CTGGTAGGTC-ACATC----TG-T-AAT------CC----TAGC-A-C-TT-TGGGAG-GCT----GA---GGT------GG------GAAGATCGC-T-------T--------GAC-C-C----CAGGA---GTTA---GAGC-CAG-CC-T--GGGTAA-C-ATA-G-CAAG-A-----CCCCAGCTCTA-------------------------------
>AluJo_352
--------------------------------------------------GGCTGG--GC---ATGGTGCCCC-ACACC----TG-T-AAT------CC----CAGC-A-C-TT-TGGAAG-GTT----GA---GAC------AG------AAAGACTGC-T-------T--------GAG-T-C----CAGGA---GTTT-A-AAAC-TAG-CC-T--GGGCAA-C-ATA-G-CAAG-A----GAC-TGTCTCT--------------------------------
>AluJo_353
--------------------------------------------------GGCTGG--GC---ATGGTGCCCC-ACACC----TG-T-AAT------CC----CAGC-A-C-TT-TGGAAG-GTT----GA---GAC------AG------AAAGACTGC-T-------T--------GAG-T-C----CAGGA---GTTT-A-AAAC-TAG-CC-T--GGGCAA-C-ATA-G-CAAG-A----GAC-TGTCTCT--------------------------------
>AluJo_354
--------------------------------------------------GGCTGG--GC---ATGGTGCCCC-ACACC----TG-T-AAT------CC----CAGC-A-C-TT-TGGAAG-GTT----GA---GAC------AG------AAAGACTGC-T-------T--------GAG-T-C----CAGGA---GTTT-A-AAAC-TAG-CC-T--GGGCAA-C-ATA-G-CAAG-A----GAC-TGTCTCT--------------------------------
>AluJo_355
---------------------------------------------------GCTGG--GC---ATGGTGGCTC-ACACC----TG-T-CAT------CT----CAGC-A-C-TT-CAGGAA-GCC----GA---GGG------GT------GGGGATTGC-T-------T--------GAT-C-C----CAGGA---GTTT-G-AGAC-CAG-CC-T--GGGCAA-C-ATA-G-TGAG-----TCCT-CATCTCTA-------------------------------
>AluJo_356
--------------------------------------------------GGTCGG--GC---GCAGTGGCTC-ATGCC----TG-T-AAT------CC----CAGT-A-C-TT-TAGGAT-GCT----GG---AGT------GG------GAGGATTAC-G-------C--------TAG-T-C----CAGGA---GTTT-G-AGAC-CAG-CC-T--GGGCAA-C-ATG-G-TGAG-A----CTC-CCTCTCT--------------------------------
>AluJo_357
--------------------------------------------------GGCCAG--GT---GCCGTGGCTC-ACGCC----TG-T-AGT------CC----CAGG-A-C-TT-TGGGAG-GCC----CT---GGC------TG------ACAGATAGC-T-------T--------AAA-C-C----CAGGA---GTTT-G-AGAC-CAG-CC-T--GGGCAA-C-ACA-G-TGAG-A----CCT-CATCTCT--------------------------------
>AluJo_358
--------------------------------------------------GGCCTG--GC---GCAGTGGCTC-ACACC----TG-T-AAT------CC----CAAC-A-C-TT-TGGAAG-GCT----GA---GGC------AA------ACTGATTGC-T-------T--------AAG-C-C----CAGGA---GTTT-G-AGAC-CAG-CC-T--AGGCAA-C-ATA-G-TAGG-A-----CC-CGTCTCTA-------------------------------
>AluJo_359
---------------------------------------------------GCCAG--GC---ACGGTGGCTC-ACTCC----CT-T-AGT------CC----CAGC-A-C-TT-TGGAAG-GCT----GC---AGT------AG------GCAGATTGC-T-------T--------GAG-C-C----CAGGA---GTTT-G-AGAC-CAC-CC-T--GGGCAA-A-ATG-G-TGAG-A----CCC-CATCTCTA-------------------------------
>AluJo_360
--------------------------------------------------GGTCGT--GT---GTAATGGCTC-ATGCC----TG-T-AAT------CC----CAAC-A-C-TT-TGGGAG-ACT----GA---GGC------AG------AAGGATTGC-T-------T--------GAA-C-C----CAAGA---ATTT-G-AGAG-CAG-CC-T--GAGCAA-C-ATA-C-TGAG-A----CCC-CATCTCT--------------------------------
>AluJo_361
--------------------------------------------------GGCCAG--GT---GCAGTGGCTC-AAACC----TG-T-AGT------CC----CAAG-T-C-TT-TAGGAG-GCC----AA---GGC------AG-------AGGATTGC-T-------T--------GAG-C-C----CAGGA---GTTC-A-AGAC-TAG-CC-T--GTGCAA-C-ATA-G-AGAA-A----ACT-CATCTCTA-------------------------------
>AluJo_362
--------------------------------------------------GGCCAG--AG---GCGGTGGCTC-ACATC----TG-T-TAT------CC----CAGC-A-C-TT-TGGGAG-G-T----GA---GGT------GG------AAAGATAGC-T-------T--------GAG-C-C----CAGGA---GTTC-C-AGAC-CAG-CC-T--AGGCAA-T-ATA-G-GGAG-A----TTC-CATCTCTA-------------------------------
>AluJo_363
--------------------------------------------------GGCTGG--GC---GTAGTTGCCC-ACGCC----TG-T-AAT------CC----TAGC-A-T-TT-TGGGAG-GCT----GA---GTC------AG------GAGGATTGC-T-------T--------GGG-C-T----CAGGA---GTTC-G-AGAC-CAG--C-T--GGGCAA-C-ATT-G-TGAG-A----CTT-CATCTATA-------------------------------
>AluJo_364
---------------------------------------------------GCCAC--GC---TCAGTGGCTC-ATGTC----TG-T-AAT------CC----CAGC-A-T-CT-TGGGAG-GCC----AA---GAC------AG------GAGGATTGC-T-------T--------GAG-C-C----CAGAA---ATTC-A-AGAC-CAA-CC-T--GGGCAA-C-ATA-G-AGAG-A---CCCC-CATCTCT--------------------------------
>AluJo_365
---------------------------------------------------GCTGG--GC---GCAGTGACTC-ATGCT----TG-T-AAT------CC----CAGT-A-C-TT-CGGGAG-GCC----TA---AGT------GG------GAGGATCTC-T-------T--------GAG-C-T----CAGGA---GTTC-A-AGAC-CAG-CC-T--GGCCAA-C-ATA-A-CGAG-A----TCG-TGTCTCTA-------------------------------
>AluJo_366
--------------------------------------------------GGCCAG--GT---GTGGTGGCTC-ATGCC----TG-T-AAT------CC----CAAA-A-C-TT-TGGGAG-GTC----AA---GGT------GG------GAGAATTGC-T-------T--------GAG-C-C----CAGAA---GTTT-G-AGAC-CAG-CC-T--GGGAAA-C-AGG-G-CAAA-A----CCT-CGTCTCT--------------------------------
>AluJo_367
--------------------------------------------------GGCCGA--GT---ATGGTAGCTC-ACACC----TG-T-AAT------CC----CAGC-A-G-TT-TGGAAG-GCT----GA---GGT------GG------GAGGATCAC-T-------T--------GAG-C-C----CAGGA---ATTC-A-AGAC-CAG-CC-A--GGACAA-C-ACA-G-CGAG-A----TTT-CATCTCT--------------------------------
>AluJo_368
--------------------------------------------------GGCCGG--GT---GCGGCAGCTC-ACATC----TG-T-AAT-------C----CAGC-A-C-TT-TGGAAG-GCA----GA---GGT------GG------GAGGATCAC-T-------T--------GAG-T-C----CAGGA---GTTC-A-AGAC-CAG-CC-G--GGGCAA-C-ATA-G-CAAG-A----CCT-CATCTCTA-------------------------------
>AluJo_369
---------------------------------------------------GCCGG--GT---GCAGTGGCTC-ACGCC----TG-T-AAT------GC----CAGC-A-C-TT-TGGGAG-GCT----GA---GGC------AG------GTGGATCAC---------T--------GAG-C-T----CAAGA---GTTT-G-AGAC-CAA-CC-T--GGGCAA-C-ATG-G-TGAG-A----CTC-TGTTTTTAC------------------------------
>AluJo_370
--------------------------------------------------GGCCAG--GT---GCAGTGGCTC-ATACC----TG-T-CAT------CC----TAGC-A-C-TT-TGGGAG-GCT----GA---GGC------AA------GAGGATCAC-T-------T--------GAG-C-C----TAGAA---GTTT-A-AGAC-CAG-CC-T--GAGCAA-C-ATA-G-CAAG-A----CCC-TGTCTCT--------------------------------
>AluJo_371
--------------------------------------------------GGCCAG--AT---GCAGTGGCTC-ACATC----TG-A-CCT------CC----CAAC-A-C-TT-TGGGAG-GCC----GA---GGC------AG------GGGGATCGC-T-------T--------GAG-C-C----CAGGA---GTTT-G-AGAC-CAG-CC-T--GGACAA-C-ATT-G-TGAG-A----CCC-TGTTCCT--------------------------------
>AluJo_372
--------------------------------------------------GGCCAG--AT---GCAGTGGCTC-ACACC----TG-T-AAT------CC----CAGC-A-C-TT-TGGGAG-ACT----GA---GGC------AG------GAGGATC-C-T-------T--------GAG-C-C----CAGTA---GTTT-C-AGAC-CAG-CC-T--GGACAA-C-ACA-G-TGAG-A----CTC-TGTTTCTA-------------------------------
>AluJo_373
--------------------------------------------------GGCCAG--GT---GCAGTGGCTC-ATACC----TG-T-AAT------CC----CAGC-A-C-TT-TGGGAG-GCT----GA---GGT------GG------GAGGATCTT-T-------T--------GAG-C-C----CAGGA---GTTT-A-ACAC-CAG-CC-T--GGA-AA-C-ATA-G-CAAG-A----CTC-TGTTTCTA-------------------------------
>AluJo_374
--------------------------------------------------GGCCAG--GT---GTGGTGGTTC-ATGCC----TG-T-GAT------CC----TAGC-A-A-TT-TGGGAG-TCC----AAG--GTT------GG------GAGGGTTAC-T-------T--------GAG-T-C----CTGGA---GTTC-G-AGAC-CAG-TC-T--GAGCAA-C-ATA-G-CGAG-A----CCC-CGTGTC---------------------------------
>AluJo_375
--------------------------------------------------GGCCAG--GT---GTGGTGGTTC-ATGCC----TG-T-GAT------CC----TAGC-A-A-TT-TGGGAG-GCC----AAG--GTT------GG------GAGGGTTAC-T-------T--------GAG-T-C----CTGGA---GTTC-G-AGAC-CAG-TC-T--GAGCAA-C-ATA-G-TGAG-A----CCC-CGTGTC---------------------------------
>AluJo_376
--------------------------------------------------GGCCAT--GG---GTGGTGGCTC-ACGTT----TA-T-AAT------CC----CAGC-A-C-TT-TGGGAG-GCC----AA---GGC------AG------AAGGATTGC-T-------T--------GAG-C-C----CAGGA---GTTT-A-AGAT-CAG-CC-T--GGGCAA-T-ATA-G-TAAG-A----TCC-TGTCTCC--------------------------------
>AluJo_377
--------------------------------------------------GGCTGG--GC---AAGGTAGCTC-ACATC----TA-T-AAT------CC----CAGC-A-C-TT-TGGGAG-GCT----GA---GGC------AG------GAGAATTGT-T-------T--------AAG-C-C----CAGGA---GTTT-G-AGAC-CAA-CC-T--GGGCAA-C-ATA-G-CTAG-A----CCA-CATCTCT--------------------------------
>AluJo_378
---------------------------------------------------GCCAG--GA---GTAGTTGTTC-ATACC----TG-T-AAT------CT----CAGC-A-C-TT-TGAGAG-GCT----GA---GAT------GG------GAGGATCGC-T-------T--------GAG-C-C----CAGGA---GTTT-G-AGAT-CAG-CC-T--GAGCAG-G-ATA-G-GGAG-A----CCC-TATCTCTA-------------------------------
>AluJo_379
--------------------------------------------------GGCCTG--GT---ACGATGGCTC-ATGCC----TG-T-AGT------CC----CAGC-A-C-TT-TGGGAG-GCT----GG---GGT------GA------GAGGATTGC-T-------T--------GAA-C-T----CAGGA---GTTT-G-AAAC-CAG-CT-T--GGGCAA-C-ATG-G-AGAA-A----CCC-CATCTCT--------------------------------
>AluJo_380
--------------------------------------------------GGCTGG--GC---ATGGTGGCTC-ACACC----TG-T-ATT------CC----CAGA-A-A-TT-TGGAAG-GCT----GA---GGT------GG------GAGGATGGC-A-------T--------AAG-C-C----CAGGA---GTTCAA-AGAC-TAG-CC-T--GGGCAA-A-ATA-G-CAAG-A----CCC-CAACTC---------------------------------
>AluJo_381
--------------------------------------------------GGCTGG--GT---GCGGTGGCTC-ATGCC----TG-T-AAT------CC----CAGC-A-C-TT-TAGGAG-GCC----AA---TGC------AG------CAGGATCAC-T-------C--------GAG-T------CCCAA---GTTC-A-AGAA-TAG-CC-T--GGGCAA-C-ACA-G-TGAG-A----GCC-TGTCTCTA-------------------------------
>AluJo_382
--------------------------------------------------GGCTGG--GC---ATGGTGGCTC-ACGCC----TA-T-AAT------CC----CAGC-A-C-TT-TGGGAG-GCA----GA---GGT------GG------AAGGATTGC-T-------T--------GAG-C-C----CAAGA---GTTC-A-AGAC-CAC-CA-T--GGGCAA-C-ATA-A-TGAG-A----TCC-TGTCTCT--------------------------------
>AluJo_383
--------------------------------------------------GGCAAG--GC---AAGGTAGCTC-ACGCC----TA-T-AAT------CC----CAGC-A-C-TT-TGGGAG-GCT----GA---GGG------GG------GAGGATTGC-T-------T--------GAG-C-C----CAGGA---GTTC-A-AGAC-CAG-CC-T--GGGCAA-C-ATA-C-AGAG-A----TCT-TGTCTCT--------------------------------
>AluJo_384
---------------------------------------------------GCAGA--GC---ACAGGGGCTC-ATGCC----TG-T-AAT------CC----CAAC-A-C-TT-GGGGAG-GCC----AA---GGC------AA------GAAGACAGT-T-------T--------GAG-C-C----CAGAC---GTTT-G-AGAC-CAG-CT-T--GGGCAA-C-ATA-G-TGAG-A----CCC-TATCTCTA-------------------------------
>AluJo_385
---------------------------------------------------GCCAA--GC---ATGGTGGCTC-AGGCC----TG-T-AAT------CC----CAGT-G-C-TT-TGAGAA-GCT----GA---GGT------GG------GAGGATCAC-T-------T--------GAG-T-T----GAGGA---CTTT-G-AGAC-CAG-CC-T--GGGCAA-C-ATA-G-TAAG-A----CCC-TGTCTCTA-------------------------------
>AluJo_386
--------------------------------------------------GGCTGA--GT---GTGGTGGCTC-ACATC----TG-T-AAT------CC----CAAG-A-T-TT-TGGGAG-GCC----AA---GGT------GG------GAGGATTGC-T-------T--------GAG-C-C----CAGGA---GTTC-G-GGAC-CAG-CC-T--GGACAA-C-ATA-G-TGGG-A---CTCC-CATCTC---------------------------------
>AluJo_387
--------------------------------------------------GGCCAG--GT---GCAGTGGCTC-ACATC----TG-T-AAT------CC----CAGC-A-C-TT-TGGGAG-TCT----GA---GGT------GG------GCGTATCAC-T-------T--------AAG-T-C----CAGGA---GATT-G-AGAC-CAG-CC-T--GGGCAA-C-ACA-G-CAAG-A----CCT-CGTCTTT--------------------------------
>AluJo_388
--------------------------------------------------GGCTGA--GT---GCAGTGGCTC-ACGCC----TG-T-AAT------CC----TAAC-A-C-TT-TGGGAA-GCT----GA---GGC------GG------GCAGGTT-T-T-------T--------GAG-C-C----CAGGA---GTTC-A-AGAC-CAG-CC-T--GGGCAA-C-ACA-G-CAAG-A----CCC-TGTTTCTA-------------------------------
>AluJo_389
--------------------------------------------------GGCCAG--CT---GTGGTGGCTC-ATGCC----TG-T-AAT------CC----CAGA-A-A-TT-TGAAAG-GCT----GG---GGT------GG------GAGGATGGC-T-------T--------GGG-C-C----CAGGA---GTTT-G-AGAA-CAG-CC-T--GGGCAA-C-AAA-G-TGAG-T----CTC-TATCTCT--------------------------------
>AluJo_390
--------------------------------------------------GGCCTG--GT---GTGGTGGCTC-ATGCC----TA-T-AAT------CC----CAGC-G-C-TT-TGGGAG-ATA----GA---GAA------GG------GAGGATTGC-T-------C--------GAG-C-C----CAGGA---GTTG-G-AGAC-CAG-CC-T--GGGGAA-G-ATA-G-TGAG-A----CCT-TGTCTCT--------------------------------
>AluJo_391
--------------------------------------------------GGCCAG--GT---TCAGTGGCTC-ATGCC----TG-T-AAT------CC----CAGC-A-C-TT-TGGGAG-AAT----GA---GGC------GA------AAGGATCGC-T-------T--------GGG-C-C----CAGGA---GCTT-G-AGAC-CAG-CC-A--GGGCAA-G-ATG-T-TGAG-A----CCC-CATCTCT--------------------------------
>AluJo_392
--------------------------------------------------GGCGAG--GC---GCAGTGTCTC-GTGCC----TG-T-AAT------CC----TAGC-A-C-TT-TGGGAG-GCC----GA---GGT------GG------GAGGGTTGC-C-------T--------GAG-C-C----CAGGA---GATG-G-AGAC-CAG-CC-T--GGGCAA-C-ACA-G-CAAA-A----CCC-CATCTCT--------------------------------
>AluJo_393
--------------------------------------------------GGCGAG--GC---GCAGTGTCTC-GTGCC----TG-T-AAT------CC----TAGC-A-C-TT-TGGGAG-GCC----GA---GGT------GG------GAGGGTTGC-C-------T--------GAG-C-C----CAGGA---GATG-G-AGAC-CAG-CC-T--GGGCAA-C-ACA-G-CAAA-A----CCC-CATCTCT--------------------------------
>AluJo_394
--------------------------------------------------GGCGAG--GC---GCAGTGTCTC-GTGCC----TG-T-AAT------CC----TAGC-A-C-TT-TGGGAG-GCC----GA---GGT------GG------GAGGGTTGC-C-------T--------GAG-C-C----CAGGA---GATG-G-AGAC-CAG-CC-T--GGGCAA-C-ACA-G-CAAA-A----CCC-CATCTCT--------------------------------
>AluJo_395
--------------------------------------------------GGCCAA--GT---ACAGTAGCTC-ATGCC----TA-T-ACT------CC----CAAC-A-C-TT-TGGGAG-GCC----GA---GGA------GG------GAGGATTGC-C-------T--------GAG-C-C----CAGGA---GTTC-C-AGAC-CAG-CC-T--GGGCAA-C-ATG-G-GGAA-A----TTC-CATCTCT--------------------------------
>AluJo_396
---------------------------------------------------GCCTG--GA---GTGGTAGCTC-ATGCT----TG-T-AAT------CC----CAAC-A-C-TT-TGGGAG-GCT----GA---AGT------GG------GAGGACTGC-T-------T--------GAG-C-C----TAGGA---GTTC-A-AGAC-CAG-CC-T--GGACAA-C-ATG-G-TGAG-A----TCC-CATCTTTA-------------------------------
>AluJo_397
---------------------------------------------------GCGGA--GT---ATGGTGGCTC-ATGCC----TG-T-AAT------CC----CAGC-A-C-TC-TGGGAA-GCC----GA---GGT------GG------GTGGATCAC-G-------T--------GAG-C-C----CAGGA---GTTT-C-AGAC-CAG-CG-T--GGGCAA-C-ATG-G-TAAG-G----CCT-TGTCTCTA-------------------------------
>AluJo_398
--------------------------------------------------GGCTGG--GC---ACATTGGCTT-GTGCC----TA-T-AAT------CC----AAGC-A-C-TT-TGGGAG-GCT----GA---GGT------GG------GAGGATTTC-T-------T--------AAG-C-C----CAGGA---CTTT-G-AGAC-CAG-TC-T--GGGCAA-C-ATG-G-CTAG-A----CCG-TGTCTCT--------------------------------
>AluJo_399
--------------------------------------------------GGCCA---GT---GTGGTGGCGC-ACACC----TA-T-AAT------CT----CAAC-A-C-TT-TGGGAG-GCT----GA---GGT------GG------GAGGATGGC-T-------T--------GAG-C-T----CAGGG---GTTC-A-AGAC-CAG-CC-T--GAGCAA-C-AAA-G-TGAG-A----CTT-CATGTCTA-------------------------------
>AluJo_400
---------------------------------------------------GCTGG--CT---GTGGTGGCTC-ATGAC----TA-T-AAT------CC----CAGC-A-C-TT-TGGGAG-GCT----GA---GGC------AG------GAGGATTGC-T-------T--------GAG-C-C----CAGGA---GTTC-A-ATCT-CAG-CC-T--GGGAAA-C-AAA-G-TAAG-A----CTC-CATCTCTA-------------------------------
>AluJo_401
--------------------------------------------------GGCCAG--GC---ATGGTGGCTC-ATGCC----TG-T-AAT------CT----CCGC-A-C-TT-TATGGG-G-T----GA---GGT------GG------GAGGATTGC-T-------T--------GAG-C-T----CAGGA---GTTC-A-AGAC-CAG-CC-T--GGGCAA-T-ACG-G-CAAG-A----CCC-TGTCTCTA-------------------------------
>AluJo_402
--------------------------------------------------GGCCAG--GT---ACAGTGGCTC-ACACT----TG-T-AAT------CC----TAGC-A-C-TT-TGGGAG-GCT----GA---GAC------GG------AAGAATTGC-T-------T--------GAC-C-C----CAGGA---GTTC-A-AGAC-CAT-CC-T--GGGCAA-C-ATT-G-TGGA-A----CCC-TGTCTCT--------------------------------
>AluJo_403
--------------------------------------------------GGCCTG--GC---TCTGTGGCTC-ATGCC----TG-T-AAT------GC----CAGC-A-C-TT-TGGGAG-GCC----GA---GGC------AG------GAGGATCGT-T-------T--------GAG-C-C----CAGGT---GTTC-A-AGAC-CAG-CC-G--AGGTGA-C-GTA-G-GAAG-A----CCC-TGTCTCT--------------------------------
>AluJo_404
--------------------------------------------------GGCCG---GT---GCAGTGGCTT-ATGCC----TG-T-GAT------CC----CAGC-A-C-TG-TGAGAG-GCT----GA---GGC------AG------GAGGATTAC-T-------T--------GAA-C-C----CAGGA---GTTC-A-AGAC-CAG-CC-T--GGGCAG-C-ATA-G-CAGG-A----GCC-CATCTTTA-------------------------------
>AluJo_405
---------------------------------------------------GCTGG--GC---ATGGTGGCTT-ATGCC----TG-T-AAT------CC----TAGC-A-C-TT-TACGAG-GTT----GA---GAC------AG------GAGGATCGC-T-------T--------GAG-C-T----TGGGA---GTTT-A-AGAC-CAG-CC-T--GGGCAA-C-ATA-G-TGAG-A----CCT-TGTCTCTA-------------------------------
>AluJo_406
--------------------------------------------------GGCTGG--GT---GAGGTGGCTC-ACACC----TG-T-AAT------CC----TAGA-G-C-TT-TGGGAA-GTT----GA---GGC------AG------GAAGATTGC-T-------T--------GAG-T-C----CAGGA---GTTG-G-AGAC-CAG-CC-T--TGGCAA-C-ATA-G-TGAG-A----CCC-TCTCTCT--------------------------------
>AluJo_407
--------------------------------------------------GGCTAG--GT---GTGGTGGCTC-ACACC----TG-T-AAT------CC----CAGC-A-C-TT-TGGGAG-CCC----GA---GGC------AG------CAGGATCAC-T-------T--------GAG-C-C----CGGGA---GTTT-G-AGAC-CAG-CC-T--GGGCAA-C-ATT-A-TGAG-A----CCC-TGTTTCT--------------------------------
>AluJo_408
--------------------------------------------------GGCTAG--GT---GTGGTGGCTC-ACACC----TG-T-AAT------CC----CAGC-A-C-TT-TGGGAG-GTC----GA---GGG------AG------GAAGATCAC-T-------T--------GAG-T-C----CAGAA---GTTC-G-AGAC-CAG-CC-T--GGGCAA-C-ATA-G-TGAG-A----CCC-TGTCTTT--------------------------------
>AluJo_409
---------------------------------------------------GCCAG--GT---GCGGTGGCTC-ACGCC----TG-T-AAT------CC----CAGC-A-C-TT-CGGGAG-GCT----AA---GGT------AG------GAGGATGGC-T-------T--------GAG-C-C----CAGGA---GTTC-A-AGAC-CAG-CT-T--GGATAA-C-ATA-G-TGGG-G----CCC-TGTCACTA-------------------------------
>AluJo_410
--------------------------------------------------GGTTGG--GT---GCAGTGGCTC-ATGCC----TA-T-AAT------CC----CAGC-A-C-TT-TGGGTG-GCT----GA---AAC------AG------GAGGATTGC-T-------T--------GAA-C-C----CAGGC---ATTC-G-AGAC-CAG-CC-T--GGGCAA-C-ATG-G-CAAG-A----CCC-CATTTCT--------------------------------
>AluJo_411
--------------------------------------------------GGCCAG--GC---GTGATGGCTC-ACATC----TG-T-AAT------CT----TAGC-A-C-TT-TGGGAA-GCT----GA---GAT------GA------GAGGATTGC-T-------T--------GAG-C-C----CAGGA---GTTT-G-AGAC-TAG-CC-T--GGGAAC-C-ATA-G-TGAG-A----CCC-CATCTTT--------------------------------
>AluJo_412
---------------------------------------------------GTCAG--GC---ACGGTGGCTC-ACATC----TG-T-AAT------CT----CAGC-A-C-TT-TGGGAG-GCT----GA---GGT------GG------GAGGATCAC-C-------T--------GAG-T-C----CAGGA---GTTT-G-AGGT-CAG-CC-T--GGGCAA-C-AAA-G-CAAG-A----CCC-CATCTCTA-------------------------------
>AluJo_413
--------------------------------------------------GGCCAG--GT---ACCAAGGCTC-ACGCC----TA-T-AAT------CT----CAGC-A-C-TT-TGGGAA-GCC----AA---GAT------GG------GAGGATTGC-T-------T--------GAG-C-C----CAGGA---TTTC-A-AGAC-CAG-CC-T--GGGCAA-C-ATA-G-CAAC-A----CCC-CACCTCT--------------------------------
>AluJo_414
--------------------------------------------------GGCCAG--AC---ATGGTGGCTC-ATTCC----TA-T-AAT------CC----CAAC-A-C-TT-TGGGAG-GCC----AA---GTC------AG------GAGTACCGT-T-------T--------GAG-C-CCAGGCAGGA---GTTG-G-AGAC-CAG-CC-T--GGGCAA-C-AAA-G-TGAG-A----CCC-TAT------------------------------------
>AluJo_415
------------------------------------------------------GG--GT---GTGGTGGCTC-ACATC----TG-T-AAT------TC----CAGC-A-C-TT-TGGGAG-GCT----GA---GGT------GG------GAGGATTAC-T-------T--------GAG-T-C----CAGGC---GTTC-A-AGAC-CAG-AC-T--GGGCAA-C-ATA-G-CCAG-A-----CACTATTTCCATAA----------------------------
>AluJo_416
-----------------------------------------------------------------------------------------AT------CC----CAGC-A-C-AT-TAGGAG-GCA----GA---GGC------AG------AAGGATCAC-T-------T--------GAG-T-T----CAGGA---GTCG-G-AGAC-CAG-CC-T--GGGCAA-C-ATA-G-TGAG-A----CTT-GGTCCCTACAAAAATTAAAAATAAGTTAGCTGGG-----
>AluJo_417
--------------------------------------------------GGCCAG--GT---GTGTTGACTC-ATGCC----TG-T-AAT------CC----CACC-A-C-TT-TG---G-GTC----GA---GGC------AG------GAGGATCAC-T-------G--------GAG-C-C----CAGGA---GTTT-G-AAAC-GAA-CC-T--AGGCAA-C-AGA-G-TGAG-A----CCC-TGTCTCTATA-----------------------------
>AluJo_418
--------------------------------------------------GGCCAG--GT---GTGTTGACTC-ATGCC----TG-T-AAT------CC----CACC-A-C-TT-TG---G-GTC----GA---GGC------AG------GAGGATCAC-T-------G--------GAG-C-C----CAGGA---GTTT-G-AAAC-GAA-CC-T--AGGCAA-C-AGA-G-TGAG-A----CCC-TGTCTCTATA-----------------------------
>AluJo_419
--------------------------------------------------GGCCAG--GT---GTGTTGACTC-ATGCC----TG-T-AAT------CC----CACC-A-C-TT-TG---G-GTC----GA---GGC------AG------GAGGATCAC-T-------G--------GAG-C-C----CAGGA---GTTT-G-AAAC-GAG-CC-T--AGGCAA-C-AGA-G-TGAG-A----CCC-TGTCTCTATA-----------------------------
>AluJo_420
--------------------------------------------------GGCCAG--GT---GTGTTGACTC-ATGCC----TG-T-AAT------CC----CACC-A-C-TT-TG---G-GTC----GA---GGC------AG------GAGGATCAC-T-------G--------GAG-C-C----CAGGA---GTTT-G-AAAC-GAG-CC-T--AGGCAA-C-AGA-G-TGAG-A----CCC-TGTCTCTATA-----------------------------
>AluJo_421
--------------------------------------------------GACCAG--GT---GTGGTGACTC-ACACC----TG-T-TAT------CC----CACC-A-C-TT-TGGGTG--------GA---AGC------AG------GAGGATCAC-T-------G--------GAG-C-C----CAGAA---GCTT-G-AAAC-CAG-CC-T--AGGCAA-C-ATA-G-TGAG-A-----CCCTGTCTCTATA-----------------------------
>AluJo_422
--------------------------------------------------GACCAG--GT---GTGGTGACTC-ACACC----TG-T-TAT------CC----CACC-A-C-TT-TGGGTG--------GA---AGC------AG------GAGGATCAC-T-------G--------GAG-C-C----CAGGA---GTTT-G-AAAC-CAG-CC-T--AGGCAA-C-ATA-G-TGAG-A-----CCCTGTCTCTATA-----------------------------
>AluJo_423
--------------------------------------------------GACCAG--GT---GTGGTGACTC-ACACC----TG-T-TAT------CC----CACC-A-C-TT-TGGGTG--------GA---AGC------AG------GAGGATCAC-T-------G--------GAG-C-C----CAGGA---GTTT-G-AAAC-CAG-CC-T--AGGCAA-C-ATA-G-TGAG-A-----CCCTGTCTCTATA-----------------------------
>AluJo_424
--------------------------------------------------GACCAG--GT---GTGGTGACTC-ACACC----TG-T-TAT------CC----CACC-A-C-TT-TGGGTG--------GA---AGC------AG------GAGGATCAC-T-------G--------GAG-C-C----CAGGA---GTTT-G-AAAC-CAG-CC-T--AGGCAA-C-ATA-G-TGAG-A-----CCCTGTCTCTATA-----------------------------
>AluJo_425
--------------------------------------------------GACCAG--GT---GTGGTGACTC-ACACC----TG-T-AAT------CC----CACC-A-C-TT-TGGGTG--------GA---AGC------AG------GAGGATCAC-T-------G--------GAG-C-C----CAGGA---GTTT-G-AAAC-CAG-CC-T--AGGCAA-C-ATA-G-TGAG-A-----CCCTGTCTCTATA-----------------------------
>AluJo_426
--------------------------------------------------GGCTGG--GC---GTGGTGGCGCATGGCC----TG-T-AAT------CC----CAGC-A-C-TT-TGGGAG-GCT----GA---GGC------AG------GAGGATTGC-T-------T--------GAA-C-C----CAGGA---GTTT-G-AGAC-CGC-CC-T--GGGCAA-C-ATA-A-TCAG-A----TCT-TGTCTC---------------------------------
>AluJo_427
--------------------------------------------------GGCCAG--GC---CTGGTGGCTC-ACACC----TG-T-AAT------CC----CAGC-A-C-TT-TGGGAG-GCC----AA---GGC------AG------GAGGATTGC-T-------C--------GGT-C------CAAGA---GTTC-A-AGAC-CAG-TC-T--GGGCAA-A-ATA-G-TGAG-A----ACT-TGTCCCTA-------------------------------
>AluJo_428
---------------------------------------------------GCCAG--GC---ATGGTGGCTC-ATGCC----TG-T-AAT------CT----CAAT-A-C-GT-TGGGAG-GCC----AA------------AG------CAGGATTGC-T-------T--------GAG-C-C----CAGGA---GTTT-G-AGAC-CAG-CC-T--GGAGAA-C-ATA-G-GAAG-A----CTC-TGTCTCTACAA----------------------------
>AluJo_429
--------------------------------------------------GGCCAG--GC---ACAATGGCTC-ATGCC----TG-T-AAT------CC----CAAC-A-C-TT-TGGGAG-GCT----GA---CGC------AG------GAGGATCCC-T-------T--------GAG-C-C----CAGGA---ATTT-G-AGAC-TAG-CC-T--GGGCAA-T-GGA-G-GGAG-A----TCT-CATCTCT--------------------------------
>AluJo_430
--------------------------------------------------GGCCAG--GC---GTGGTGGCTC-ATGCC----TG-T-AAT------CC----CAGC-A-CTTT-TGAGAG-GCT----GA---AGC------AG------GAGGATCCC-T-------T--------GAG-C-C----CAGGG---GTTT-G-AGAC-CAG-CC-T--GGGCAA-T-AGA-G-CGAG-A----CCT-CATCTC---------------------------------
>AluJo_431
--------------------------------------------------GGCTGA--GA---GCAGTGGCTC-ATGCC----TG-C-AAT------CC----AAGC-A-C-TT-TGGGAG-GCT----GAA--GGT------GA------GAGGACTGT-C-------A--------GAG-C-C----CAGGA---GTTT-G-AGAC-CAG-CT-T--GAGCAA-C-ATA-G-TGAG-A----CTC-TGTCTC---------------------------------
>AluJo_432
---------------------------------------------------GCTGG--GC---ATGGTGGCTC-ATGCC----TG-T-AAT------CT----CAAC-A-C-TT-TGGGAA-GCT----GA---GGC------GG------GAGGGTTGC-T-------T--------GAG-T-T----CAGGA---GTTT-G-AAAC-CAG-CC-T--GGGCAA-C-ATA-G-CAAG-A----TCT-TGTCTCTA-------------------------------
>AluJo_433
----------------------------------------------------CTGG--GT---GCGGTGGCTC-ACACC----TT-T-AAT------CC----TAGC-A-C-TT-TGGATG-GCT----GA---GGT------GG------GAGGATCAC-T-------T--------GAG-C-C----CATGA---GTTC-G-AGAC-CAG-CT-T--AGGCAA-C-ATA-G-TGAG-A----CCC-TATCCCTAC------------------------------
>AluJo_434
---------------------------------------------------GCTGG--GC---GCGGTGGCTC-ACGCC----TG-T-AAT------CC----TAGC-A-C-TT-CGGGAG-GCC----AA---GGT------AG------GCAGATCGC-T-------T--------GAG-C-C----CAGAA---GTTC-C-AGAT-CAG-CC-T--AGGCAA-C-ATG-G-CAAG-A----CCC-CATCTCTA-------------------------------
>AluJo_435
--------------------------------------------------GGCCAG--GA---ACGGTGGCTC-ATGCC----TG-T-AAT------GC----CAGC-A-C-TT-TGGGAG-GCC----GA---GGC------AG------GAGGCTCGC-T-------T--------GAG-C-C----CAGGA---GTTC-A-AGGC-TGG-CC-T---GGCAA-C-ATA-G-GAAG-A----TCT-TGTCTCTA-------------------------------
>AluJo_436
--------------------------------------------------GGCCAG--GT---GGGGTGGCTC-ACACA----TG-T-AAT------CC-----AGC-A-C-TT-TGAGAG-GCC----AA---GGT------GG------GAGGATCCC-T-------C--------GAG-C-C----TAGGA---GTTC-G-AGAC-CAG-CC-T--GGGCAA-C-ATA-A-CAAG-A----CCT-TGCCTCTA-------------------------------
>AluJo_437
--------------------------------------------------GGCCAA--GT---GCAGTGGCTC-ACATC----TG-T-AAT------CC----GAGC-A-T-TT-TGAGAG-GTT----GG---AGC------AG------GAGGATTGC-T-------T--------AAA-C-C----CAGGA---GTTC-A-AAAC-CAG-CC-T--GGGCAA-C-ATA-G-TGAG-A----CCC-TGTTTCT--------------------------------
>AluJo_438
--------------------------------------------------GGCCGG--GT---GCAGTGATT--ATGCC----TG-T-AAT------CC----TTGC-A-C-TT-TGGAAG-GCC----AA---GGT------GG------GAGGATGGC-T-------T--------GAG-C-C----CAGGA---GTTT-G-AGAC-CAA-CC-A--GGGCAA-C-ATA-G-TGAG-A----CCC-TGTCCTTA-------------------------------
>AluJo_439
--------------------------------------------------GGCTGG--GT---GCAGTGGCTT-ACATC----TA-T-AAT------CC----CAAC-A-C-TT-TGGGAG-GCT----GA---GGT------GG------GAGGATCCC-T-------T--------GAG-T-C----CAGGA---GTTT-C-AGAT-CAG-CC-T--AGGCAA-C-ATA-C-GGAG-A----CCC-CATCTCT--------------------------------
>AluJo_440
--------------------------------------------------GGCTGG--GC---GACGTGGCTC-ATGCC----TG-T-AAA------CG----CGGC-A-C-TT-TGGGAG-GCC----AA---GGT------GG------GAGGATTGA-T-------T--------GAG-C-C----CAAGA---GTTC-A-AGAC-CAG-CC-T--GGGCAG-T-ATA-G-TGAG-A----CCT-CATCTCT--------------------------------
>AluJo_441
--------------------------------------------------GGCTGG--GT---ATGGTGGCTC-ATGCC----TA-T-AAT------CC----CAGC-A-C-TT-TGGGAG-GCT----GA---GAT------GG------GAAGATCAC-T-------T--------GAG-C-C----CAGGG---GTTC-T--GAC-CAG-TC-T--AGGCAA-C-AGA-G-TGAG-A----CCC-CATCTCTA-------------------------------
>AluJo_442
---------------------------------------------------GCCAG--GC---GTGGTGGCTA-ATGCC----TG-T-AAT------CC----CAAC-A-C-TT-TGGGAG-TCT----GA---GGC------TC------AAGGGTTGC-T-------T--------GAG-C-C----CAGGA---CTAC-G-AGAC-CAG-CC-T--GGACAA-C-ATA-G-TGAG-A----CCT-CGCCTCTA-------------------------------
>AluJo_443
---------------------------------------------------GCTGA--GC---GCGGTGGCTG-ATGCC----TG-T-AAT------CC----CAAT-G-C-TT-TGGGAG-GCT----GA---GGC------AG------AAGGATTGC-T-------T--------GAG-C-C----CAGGA---GTTT-G-AGAC-CAG-CT-T--GGAAAA-C-ACA-G-TGAG-A----CCC-TGTCTCTA-------------------------------
>AluJo_444
--------------------------------------------------GGCTAG--GT---GCAGTGGCTC-ATGCC----TG-T-AAT------TC----TAGC-A-G-TT-TTGGAG-GCT----GA---GGC------AG------GAGGATTGC-T-------T--------GAT-C-C----CAGGA---GTCT-G-AGGC-CAG-CC-T--GGGCAA-C-ACA-G-CGAG-A----GCC-TGTCTCT--------------------------------
>AluJo_445
--------------------------------------------------GGCTGG--GC---ACAGTGCCTC-ACGCC----TG-A-AAT------CC----CAGC-A-T-TT-TGGGAG-GCT----GA---GGT------GG------GTGGATGGC-T-------T--------GAG-C-C----CAGGA---GTTT-G-AGAC-CAG-CC-T--GGGAAA-C-ATG-G-CAAA-A----CCC-TGTTTTT--------------------------------
>AluJo_446
--------------------------------------------------GGCTGG--GT---GTGGTGGCTC-ATGGT----TG-T-AGT------CC----CAGA-A-C-TT-TGGGAG-ACT----AA---GGT------GG------GAGGATCAC-T-------T--------GAG-C-C----CAAGA---GTTT-G-AGAC-CAG-CC-T--GGGCAG-T-AAA-G-TGAG-A----CCC-CATCTCT--------------------------------
>AluJo_447
--------------------------------------------------GGCTGG--CT---GCAGTGGCTC-ACGCC----CG-T-AAT------CC----CAGC-A-C-TT-TGGGAG-GCC----GA---GGT------GG------GAAGATCAC-A-------T--------GAG-C-T----CAAGA---GTTT-G-AAAG-CAG-CC-T--GGGCAA-T-ATA-G-TGAG-A----CCT-CATCTCT--------------------------------
>AluJo_448
--------------------------------------------------GGCTGG--GT---GTGGTAGCTC-ACGCC----TG-T-AAT------CC----CAGA-A-C-TT-CAGGAG-GCT----GA---GGT------GA------GAGGATTGC-T-------T--------GAT-C-C----CA-CC---GTTT-G-AGAC-TAG-AC-T--GGGCAA-C-ATA-G-TGAG-A----CCT-CATCTCTA-------------------------------
>AluJo_449
---------------------------------------------------GCCTG--GC---ATGGTGGCTC-ATGCC----TG-T-AAT------CC----TAGC-A-C-TT-TGGGAG-GCT----GA---GGC------AG------GAAGATTAC-T-------T--------GAG-C-T----TAAGA---GTTC-A-AGAC-CAG-AC-G--GGGCAA-C-ATA-G-TAAG-T----CCC-CATCTCTA-------------------------------
>AluJo_450
---------------------------------------------------GCGGG--GT---GTGGTGGCTC-ATTCC----TG-T-AAT------TC----CAGC-A-C-TT-TGGGAG-GCC----GA---GAT------GG------GAGGATTGC-T-------T--------GAT-C-C----CAGGA---GCTC-A-GGAC-CAG-CC-T--GGACAA-C-ATG-G-CAAA-A----CCC-CATCTCTA-------------------------------
>AluJo_451
--------------------------------------------------GGCTGG--GT---GTGGTGGCTC-GTGCC----TA-T-AAT------CC----TAGT-A-C-TT-TGGGAG-GCT----GA---TGC------TG------GTGGATAGC-T-------T--------GAG-T-C----TAGGA---GTTC-T-AGAG-CAG-CC-T--GGGCAA-C-ATG-G-CAAA------CCC-CATCTCTA-------------------------------
>AluJo_452
--------------------------------------------------GGCTGG--GC---GTGGCAGCTC-ACACC----TG-T-AAT------CC----CAGC-A-C-CT-TGGGAG-GCC----GA---GGC------AG------GAGGATTAC-T-------T--------GAG-C-C----CAGGA---GTTC-A-AGAC-CAT-CC-T--GGGCAA-C-AGA-T-CAAG-A----CTG-CATCTCT--------------------------------
>AluJo_453
--------------------------------------------------GGCTGG--AC---ATGGTGGATC-ACACA----TG-T-AAT------CC----CAAC-A-T-TT-TGGGAG-GCC----AA---AGC------AG------GAGGATCAC-T-------T--------GAG-C-C----CAGGA---GTTC-A-AGAC-CAG-CC-T--GGACAA-C-ATA-G-CAAG-A----CCC-TGTCTCT--------------------------------
>AluJo_454
--------------------------------------------------GGCCTG--GG---GTGGTGGCTC-ATGCC----TG-T-AAT------CC----TAGC-A-C-TT-TGGGAA-GCT----GA---GGC------AG------GAGGACTGG-T-------T--------GAG-C-C----CAGGA---GTTC-C-AATC-AAA-CC-T--GGGCAA-C-ATA-G-TGAG-A----CCC-TGTCTCT--------------------------------
>AluJo_455
--------------------------------------------------GGCCAG--GT---GTGGTGGCTC-ACACC----TG-T-AAT------CT----TAGC-A-C-TT-GGGGAG-GCT----GA---GGT------GG------GAGGAT-GT-T-------T--------GAG-C-C----CAGGG---ATTC-A-AGAC-CAG-CT-T--GGGCAA-C-ATA-G-CAAG-A----CCC-CATCTCTA-------------------------------
>AluJo_456
--------------------------------------------------GGCCAG--GC---ACAGTGGCTC-ACGCC----TG-T-AAT------CT----CGGC-A-C-TT-TGGGAG-GCT----GA---GGT------GG------GTGGATCAC-T-------T--------GAG-C-C----AAGGA---GTTA-G-AGAC-CAG-TC-T--GGGCGA-C-ATG-G-TGAG-A----CTC-CATCTCT--------------------------------
>AluJo_457
---------------------------------------------------GCCAG--CT---GCAGTGGCTC-ATGCC----TG-T-AAT------TC----CAGC-A-C-TT-TGGGAG-GCC----AA---GGC------GG------GAGGATCAC-T-------T--------GAG-C-C----TAAGA---ATTC-A-AGAC-CAG-CC-T--AGGCAA-T-ATA-G-TGAG-A----CCC-AATCTCTA-------------------------------
>AluJo_458
--------------------------------------------------GGCTGG--GT---GTGGTGGCTC-ATACC----TG-T-AAT------TC----TAAC-A-C-TT-TAGGAA-GCT----GA---GGC------AG------GAGGATCAC-T-------T--------GAG-C-C----CAGAA---ATTT-G-AGAC-CAG-CC-T--GGGCAA-C-ATA-G-TGAG-A----CCT-CATCTCT--------------------------------
>AluJo_459
---------------------------------------------------GCTGG--GC---ACAGTGGCTC-ATGCC----CA-T-AAT------CT----CAGC-A-C-AT-TGGGAG-GCC----AA---GGT------GG------GAGGATTGC-T-------T--------GAG-T-C----CAGGA---GTTC-A-AGAC-CAG-CC-T--TGAAAA-C-ACA-G-CAAG-A----GCC-TATCTCTA-------------------------------
>AluJo_460
--------------------------------------------------GGCCAG--GT---GTGGTGGCTC-ACACC----TG-T-AAT------CC----CAGC-A-C-TT-CGGGAG-GCT----GA---GGC------AG------GAGGATCAC-T-------T--------GAG-C-C----CAGGA---GTTC---GAAC-CAA-CCTT--GGGCAG-C-ATA-G-TGAG-A-----CCCCTTCTCT--------------------------------
>AluJo_461
--------------------------------------------------------------------GGCTC-TCACC----TA-T-AAT------CC----AAGC-A-C-TT-TGGGAG-GCC----AA---AGG------GG------GAGGACTGC---------T--------GAG-C-C----CAGGA---GTTC-A-AGAC-CAG-CC-T--GGGCAA-C-ATA-G-CAAG-G---ACCC-CATCTCAACAACAACAAAAA-------------------
>AluJo_462
----------------------------------------------------CCAG--GT---GTGGTGGCTC-ATACC----TG-T-AAT------CT----CAGC-A-C-TT-TGGGAG-GCC----GA---GGC------AG------GAGGA-----G-------T--------GAG-C-C----CATGA---GTTA-G-AGAA-CAGCCC-T--AGGCAA-C-ATA-G-CAAG-A----CAT-TGTCTCTACAAA---------------------------
>AluJo_463
---------------------------------------------------GCCAA--GT---GTGGTGGCTC-ACATC----TG-T-AAT------CC----CAGC-A-C-TT-TGGGAG-GCT----GA---GGT------GG------GTAGATTGC-T-------T--------GAG-T-C----CAGGA---GTTC-G-AGAC-CAG-CC-T--GGGCAG-C-ATG-G-TGAA-A----CCT-TGTATCTA-------------------------------
>AluJo_464
--------------------------------------------------GGCCAG--GT---GCAATGGCTC-AAGCC----TG-T-AAT------GC----CGGC-A-C-TT-TGGGAG-GCT----GAGGTGGT------GG------GAGGATCAC-T-------T--------GAG-T-C----CAGGA---GTTT-G-AGAT-CAG-CC-T--GGGCAA-C-ATA-G-AGAG-A----ACC-CGTC-----------------------------------
>AluJo_465
---------------------------------------------------GCCAG--GT---GTGGTGGCTC-ACCAC----TG-T-AAT------CC----TGGC-A-C-TT-TGGCAG-GCT----GA---GGC------AG------GTAGATTGC-T-------T--------GAG-C-C----CAGGA---GTTC-G-AGAC-CAG-CC-T--GGGCAA-C-ATA-G-GAAG-A----TTC-TGTCTCTA-------------------------------
>AluJo_466
--------------------------------------------------GACCCG--GT---TTGGTGGCTC-ACCCC----CA-T-AAT------CC----CAGC-A-C-TT-TGGGAG-GCG----GA---GGC------AA------GAGAATTGC-T-------T--------GAG-C-C----CAGGT---GTTT-G-AAAC-CAG-CC-T--GGGCAA-C-ATA-G-TGAG-A----CCC-TGTCTCT--------------------------------
>AluJo_467
---------------------------------------------------GCTGG--GT---GTGGTGGCTC-ACACC----TG-T-AAT------CC----TAGC-A-T-TC-TGGGAG-ACT----GA---GAC------AG------GAGGATTGC-T-------T--------CAG-C-C----CAGGA---GTTT-A-AGAC-CAT-CC-T--GGGCAA-A-AAA-G-TGAG-A----CCC-TGTCTTTA-------------------------------
>AluJo_468
---------------------------------------------------GCTAG--AC---ATGGTGGCTC-ATGCT----TG-T-TAT------CT----CAGT-A-C-TT-TGGGAG-GCT----GA---GGC------AG------GAGGATTGC-T-------T--------GAG-C-C----CAGGA---GTTC-A-AGAA-CAG-CC-T--GGGCAA-C-ATA-G-AGAG-A---CCCC-TATCTCT--------------------------------
>AluJo_469
----------------------------------------------------CTGG--GT---GCAATGGCTC-ACACC----TA-T-AGT------CC----TAGC-A-C-TT-TGGGAG-GCC----AA---GGC------TG------GAGGATTGC-T-------T--------GAG-C-C----CAGAA---GTTT-G-AGAC-CAG-CC-T--AGGCAA-C-ATA-G-TGAA-A----CCC-CATCTCTAC------------------------------
>AluJo_470
---------------------------------------------------GCCAG--GT---GTAGTAGCTC-ACGCC----TG-T-AAT------CC----CAGC-A-C-TT-TGGGAG-GCT----GA---GAC------GG------GCAGATTGC-C-------T--------GAG-C-CT---CAGGA---GTTC-G-AGAC-CAG-CT-G--GGGCAA-T-GTA-G-CGAG-A----CCT-CATCTCT--------------------------------
>AluJo_471
--------------------------------------------------GGCCAG--GT---GTGGTGACTC-ACACC----TG-T-AAT------TC----TAGC-A-C-TT-TGGAAG-GCT----GA---GGT------GG------GAGGATCAC-T-------T--------GAG-C-T----CAGAA---GTCT-G-AGAC-CAG-CC-T--GTGCAA-C-ATA-G-TGAG-A-----CC-TGTGTCTC-------------------------------
>AluJo_472
--------------------------------------------------GGCTGG--GT---GCGGTGGCTC-ATGCC----TG-T-AAT------CC----CAGC-A-C-TT-TGGGAG-GGA----AG---GGC------AG------GAAGATTGC-T-------T--------GAG-C-C----CAGGA---GTTT-G-AAAC-CAG-CC-T--GGGCAA-C-ATA-A-CAAG-A----CCC-TGTCTTT--------------------------------
>AluJo_473
--------------------------------------------------GGCTGG--GC---ACGGTGGCTC-ATGCT----TG-T-AAT------CC----TAGC-A-C-TT-GGGGAG-GCT----GA---GGG------AG------GAGGTTTGC-T-------T--------GAG-C-C----CAGGA---GTTC-C-AGAC-CAG-CC-T--TGGCAA-C-ATG-G-CAAG-A----TCC-CATCTCT--------------------------------
>AluJo_474
---------------------------------------------------GCTAG--GC---ACAGTGGCTT-ACACC----TG-T-AAT------CC----CAGC-A-C-TT-TGGGAG-GCT----GA---ATT------GG------GAGGATCGC-T-------T--------GAT-C-C----CAGGA---GTTT-G-ACAG-CAG-CC-T--AGGCAA-C-ATA-G-TGAG-A----CCC-CATCTCTA-------------------------------
>AluJo_475
--------------------------------------------------GGCTGG--GC---ACCGTGGCAC-AT-CC----TG-T-AAT------GC----CAGC-A-C-TT-TGCGAG-GTT----GA---GGT------GG------GCGGATTGC-T-------T--------GAG-C-C----TAGGA---GTTC-A-AGAC-CAG-TC-T--AGGCAA-C-ATA-G-TGAG-A----CCC-CATCTCTA-------------------------------
>AluJo_476
--------------------------------------------------GGCCAG--GC---ATGGTGGCTC-ACACC----AG-T-AAT------CC----TAAC-A-C-TT-TGGGAG-GCT----AA---GGC------AG------GAGGATCTC-T-------T--------GAG-C-C----CAGGA---GTTT-C-AGAC-CAG-CC-T--GGGGAA-C-ATA-G-AAAG-A----CCC-TGTCTCT--------------------------------
>AluJo_477
--------------------------------------------------GGCCAA--GT---ATGGTGGCTC-AAACC----TA-T-AAT------CC----CAGC-A-T-TA-TGGGAA-GCT----GA---GGT------GG------GAGGATTGC-T-------T--------GAG-C-C----CAGGA---GTTC-G-AGAC-CAG-CC-T--GGGCAA-C-ATA-G-TGAG-C----CTC-CATCTCT--------------------------------
>AluJo_478
---------------------------------------------------GCCAG--GC---ACACTGGCTC-GCACA----TG-T-AAT------TC----CAGC-A-C-TT-TAGGAG-GCC----AA---GGT------GG------GAGGATTCC-T-------T--------GAG-C------CAGGC---GTTT-G-AGAC-CAG-CC-T--GGGCAA-C-ATA-G-TGAG-A---CCCC-CATCTCTA-------------------------------
>AluJo_479
--------------------------------------------------GGCCAG--GC---ACAGTGGCTC-ATGCC----CA-T-AAT------CC----GAAC-T-A-TT-TGGAAG-GCT----GA---GGT------GG------GCAGATTGC-T-------T--------GAG-C-C----CAGGA---GTTT-G-AGAC-CAG-CC-T--GAGCAA-C-ATA-G-TGAG-A----CCT-CATCTCT--------------------------------
>AluJo_480
--------------------------------------------------GGCCTG--GT---GCAGTGGCTC-ATATC----CA-T-AAT------CC----CAGG-A-C-TT-TGGGAG-GCC----AA---GGT------GA------GAGGATCAC-T-------T--------GAG-C-C----CAGGA---CTTC-A-AGAC-TAG-CC-T--GGGCAA-C-ATA-G-TGAG-A-----CC-CATCTCTA-------------------------------
>AluJo_481
--------------------------------------------------GGCCTG--GT---GTGGTGACTC-TTGCC----TA-T-AAT------CC----CAGC-A-T-TT-TCGAAG-GCT----GA---GGC------AG------GAGGATCAC-T-------T--------GAA-T-C----CAGGA---GTTT-G-AGAC-CAG-CC-T--GGGCAA-C-ATA-G-TGAG------CCC-TATCTCTA-------------------------------
>AluJo_482
--------------------------------------------------GGCTAG--TT---GTGGTGACTC-ATGCC----TG-T-AAT------CC----CAAC-A-C-TG-TGGGAG-GCT----GA---GGC------AG------GAGGGTTGC-T-------T--------GAG-C-C----CAGGA---GTTC-G-AGAC-CAG-CC-T--GGACAA-C-ACA-G-TGAG-A-----CT-CATCTCTA-------------------------------
>AluJo_483
--------------------------------------------------GGCTGG--GT---GCGGTGGCTT-ATGCC----TG-T-AAC------CC----TAAC-A-C-TT-TGAGAA-GCT----GA---GGT------GG------GAAGATAGC-A-------T--------GAG-C-C----CAGGA---GTTT-G-AGAC-CAG-CC-T---GGCAA-C-ATA-A-TGAG-G----CCC-TGTCTCTA-------------------------------
>AluJo_484
---------------------------------------------------GCCGG--GT---GGGGTGGCTC-ACTCC----TG-T-AAT------CC----CAGC-A-C-TT-TGGGAG-GCC----GA---AGC------CG------GTGGATTGC-T-------T--------GAG-T-T----CAGGA---GTTC-G-AGAC-CAG-CC-T--GGGAAA-C-ATG-G-CAAG-A----CCC-CATCTCTA-------------------------------
>AluJo_485
---------------------------------------------------GCTAG--GC---ACAGTGGCTC-ATGCC----TG-T-AAT------CC----CAGC-A-C-TT-TTGGAG-GCC----CA---GGG------AG------GAGGATTGC-T-------T--------GAA-C-C----CAGGA---GTTC-A-AGAC-CAG-CC-T--AGGCAA-C-ATA-G-CAAG-A----GCC-TATCTCTA-------------------------------
>AluJo_486
---------------------------------------------------GCTAG--GC---ACAGTGGCTC-ATGCC----TG-T-AAT------CC----CAGC-A-C-TT-TTGGAG-GCC----CA---GGG------AG------GAGGATTGC-T-------T--------GAA-C-C----CAGGA---GTTC-A-AGAC-CAG-CC-T--AGGCAA-C-ATA-G-CAAG-A----GCC-TATCTCTA-------------------------------
>AluJo_487
--------------------------------------------------GGCTGG--GT---TTGGTGGTTC-ACACC----TG-T-AAT------CC----CAGC-A-C-TT-TGGGAG-GCT----AA---GGT------GG------GCAGATCAC-T-------G--------GAG-C-C----CAGGA---GTTT-G-AGAC-CAG-TC-T--GGGCAA-C-ATA-G-TAAG-A----CCC-AATCTCT--------------------------------
>AluJo_488
--------------------------------------------------GGCCAG--GC---ACGGTGGTTC-ATGCC----TG-T-AAT------CT----CAGC-A-C-TT-TGGGAG-GCC----AA---GGC------AG------GAGGACAGC-T-------T--------GAG-C-C----CAGGA---GTTC-G-AGAC-CAG-AG-T--GGG-AA-C-ACA-G-TGAC-A----CCC-TGTCTCTA-------------------------------
>AluJo_489
--------------------------------------------------GGCCAG--GT---GCGGTGGCTC-ATGCC----TG-T-AAT------CC----TAGC-A-C-TC-TGGGAG-GCT----GA---AGC------AG------GAGGCTCAC-T-------T--------GAG-C-C----CAGGA---GCTG-G-AGAT-CAG-TC-T--GGGCAA-C-ATA-G-TGAG-A----CAC-TGTATCT--------------------------------
>AluJo_490
---------------------------------------------------GCCAG--GC---ATGGTGGCTC-ATGCC----TG-T-AAT------CC----CAGC-A-C-TT-TGGGAA-GTG----GA---GGT------GG------GAGGATTGC-T-------T--------GAG-T-G----CAGGA---GTTC-G-AGAC-CAG-CC-T--AGGCAA-C-ATA-G-TGAG-A----CAC-CATCTCTA-------------------------------
>AluJo_491
---------------------------------------------------GCCAG--GT---ATGGTGGCTC-ATGCC----TG-G-AGT------CC----CAGC-A-G-TC-TGGGAA-GCC----AA---GGT------GG------GAGTATTGC-T-------T--------GAG-C-C----CAGGA---GTTT-G-AGAC-CAG-CC-T--GGGCAA-C-ATA-G-TGAG-A----CTT-TGTCTCTA-------------------------------
>AluJo_492
---------------------------------------------------GCCGG--GT---GCTGTGGCTC-ACGCC----TG-T-AAT------CC----CAAC-A-C-TT-TGGGAG-GCT----GA---GGC------GG------GATGATTGT-T-------T--------GAG-C-T----CAGGA---GTTT-G-AGAA-CAG-CC-T--GGGGAA-C-ATA-G-CAAG-A----CCT-TGTCTCTA-------------------------------
>AluJo_493
---------------------------------------------------------------GCGGTGGCTC-ATACC----TG-T-AAT------CC----TAGC-A-C-TT-TGGGAG-GCC----GA---GGC------AG------AAGGATTGC-C-------T--------GAG-C-C----CAAGA---GTTT-G-AGAC-CAG-CC-T--AGACAA-C-ATG-G-TGAG-A----CCC-TGTTTCTACAAAAAA------------------------
>AluJo_494
--------------------------------------------------GGCCAG--GC---ACAGTGGCCC-ACACC----TG-T-AAT------CC----CAAC-A-C-TT-TGGGAG-GCT----GA---GGC------AG------TAGGATTGC-T-------T--------GAG-C-C----CAGGA---GTTC-G-AGAC-TAG-CC-T--CAGCAA-C-ATA-G-CAAA-A----ACC-CATCTCT--------------------------------
>AluJo_495
--------------------------------------------------GGCTGGCTGT---GTGGTGGCTC-ATGCC----TG-T-AAT------CT----CAGC-A-C--T-TGGGAG-GCT----GA---GGT------TG------GAGGACTGC-A-------T--------GAG-C-C----CAGGA---GTTC-G-AGAC-CAG-TC-T--GGACAA-C-ATA-G-TGAG-A----ACC-TGTCTC---------------------------------
>AluJo_496
--------------------------------------------------GGCCAG--GC---ATGGTGGCTC-ATGCC----TG-T-AAT------CC----GAGC-A-C-TT-TGGGAG-GCT----GA---GGC------AG------GCAGATTGC-T-------T--------GGG-T-T----CAGGA---GCTC-A-AGAC-CAG-CC-T--GGGCAA-C-TTA-G-TGAA-A----CCC-TGTCTCT--------------------------------
>AluJo_497
--------------------------------------------------GGCCAG--GC---TCGGT-GCTC-CCGCC----TG-T-AAT------CC----CAGC-A-C-TT-TGGGAG-ACC----AA---GGC------AG------GAGGATTGC-T-------T--------GAG-C-C----TAGGA---ATTT-G-AGAC-CAG-CC-T--GGGCAA-C-AAA-G-TAAG-G----CCC-TGTCTTTA-------------------------------
>AluJo_498
--------------------------------------------------GGCTGG--GC---ATGGTAGCTC-ATGCC----TG-T-AAT------CC----CAGC-A-C-TT-TGGGAG-GCT----GA---TGC------AG------GAGGATTGC-T-------T--------GAG-C-C----CAGGA---GTTT-G-A-AC-CAG-CC-T--AGGCAA-C-ATA-G-GAAG-A----CCC-TGTTCCTA-------------------------------
>AluJo_499
--------------------------------------------------GGCTGG--GT---GTGGTGGCTC-ATGCC----TG-T--AT------TC----CAGC-A-C-TT-TGGGAG-GTT----GA---GGC------AG------GAGGATCGC-T-------T--------GAG-C-C----CAGGA---GTTT-G-AGAT-CAG-CC-T--AGGCAA-C-ATA-G-GGAG-A----CCC-TGTTTCTA-------------------------------
>AluJo_500
--------------------------------------------------GGCTGG--GT---GTGGTGGCTC-ATGCC----TG-T--AT------CC----CAGC-A-C-TT-TGGGAG-GTT----AA---GGC------AG------GAGGATCGC-T-------T--------GAG-C-C----CAGGG---GTTT-G-AGAT-CAG-CC-T--AGGCAA-C-ATA-G-GGAG-A----CCC-TGTTTCTA-------------------------------
>AluJo_501
----------------------------------------------------CTGG--AG---ACAGTAGCTC-ATGCC----TG-T-AAT------CC----CAAC-A-C-TT-TGGGAG-GCT----AA---GGC------AG------GAGGATTGC-T-------T--------GAG-C-C----CAGTA---GCTC-G-AGAC-CAG-CT-T--GGGCAA-C-ATA-G-TGAG-A---CCCC-CATCTCTA-------------------------------
>AluJo_502
--------------------------------------------------GGCCTG--GT---GCAGTGGCTC-ATGCC----TG-T-AAT------CC----CAGC-A-C-TT-TGGGAG-GCT----GA---GGT------GG------AAGGATCAC-T-------T--------GAG-C-C----CAAGA---GTTA-C-AGAC-CAG-TT-T--GGGCAA-C-ATA-G-TGAG-A----CTC-CATCTTT--------------------------------
>AluJo_503
--------------------------------------------------GGCCAG--GC---ACGGTGGCTC-ATGCC----TG-T-AGT------CC----CAGC-A-T-TT-CGGGAG-GCC----AA---GGT------GG------GCAAACTGC-T-------T--------GAG-C-T----CAGGA---GTTC-G-AGAC-CAG-CC-T--GGGCAA-C-ATG-G-TGAA-A----CCC-CATCTCT--------------------------------
>AluJo_504
---------------------------------------------------GCTGG--GT---GTGGTGGCTC-ACACC----TG-C-AAT------CC----CAGC-A-C-TT-TGGGAG-GCT----GA---GGG------GG------GAGGATCAC-T-------T--------CAG-C-C----CAGGA---GTTT-G-AAAC-CAG-CC-T--GGGCAA-C-ATA-G-TGAA-A----CCC-CACCTCTA-------------------------------
>AluJo_505
---------------------------------------------------GCCAG--GT---GTGGTGGCTC-ATGCC----TG-T-AAT------CC----CAGC-A-C-TT-TGAGAG-GCT----GA---GGC------AA------GAGGATCCC-T-------T--------GAG-C-C----AAGGA---GTTC-G-AGAC-CAG-CC-T--GGGCAG-C-ATC-A-TGAG-A----CGC-CATATCTA-------------------------------
>AluJo_506
--------------------------------------------------GACTGG--GC---ACAGTGGCTT-ACTCC----TG-T-AAT------CC----CAGC-A-C-TT-TGCAAG-GCC----AA---GGT------GG------GAGGATC-C-T-------T--------GAG-C-C----CAGGA---GTTC-A-AGAC-CAG-CC-T--AGGCAA-C-ATA-G-TGAG-A----CCC-TGTCCCTA-------------------------------
>AluJo_507
---------------------------------------------------GCCTG--GT---GCAATGGCTC-AGGCC----TG-T-AAT------CT----CAGC-A-C-TT-TGGGAG-GCT----GA---GGT------AG------GAGGATTGC-T-------T--------GAG-C-C----CAGGA---GTTC-A-AGAC-CAG-CC-T--GGGCAA-C-ATA-G-CAAT-A----ACC-GATCTCTA-------------------------------
>AluJo_508
--------------------------------------------------GACCAG--GC---GCAGTGGCTC-ATG-C----TG-T-AAT------CT----CAGC-A-C-TT-TGGGAG-GCT----GA---GGC------AG------GAGGATCGC-T-------G--------GAG-T-C----CAGGA---GTTC-A-AGAC-CAG-CC-T--GGGCAA-C-ATA-G-CGAG-A----TCT-CATCTCTA-------------------------------
>AluJo_509
--------------------------------------------------GGCCAA--GT---GCAATAGCTC-ATGCC----TG-T-AGT------CC----CAGC-A-C-TT-TGGGAG-GCC----AA---AGT------GG------GAGGATTGC-T-------T--------GAG-C-C----CAGCA---GTTC-C-AGAC-CAG-CC-T--GGGCAA-C-ATA-G-CGGA-G---ACCC-TGTCTC---------------------------------
>AluJo_510
--------------------------------------------------GGCTGG--GC----AGGTGGCTC-ACGCT----TG-T-AAT------CC----CAGT-G-C-TT-TGGGAG-GCC----GA---AGC------TG------GAGGATTGC-T-------T--------GAG-C-C----CAGGA---ATTT-G-AGAC-CAG-CC-T--GGGCAA-C-ATA-G-CAAG-A-----CCCCATGCCTA-------------------------------
>AluJo_511
---------------------------------------------------GCCAG--GT---GGGGTGGCTC-GCATC----TG-T-AAT------CC----CAGC-A-C-TC-TGGGAG-GCT----GA---GGT------GG------GAGGATCAC-T-------T--------GAG-C-C----GAGGA---GTTT-G-AGAC-CAG-CC-T--GGGCAA-C-AGA-A-GAAG-A----CCC-TGTCTCTA-------------------------------
>AluJo_512
---------------------------------------------------GCTGG--GT---GCAGTGGCTC-ACACC----TG-T-AAT------CC----CAGC-A-T-TT-TGGGAG-GCT----GA---AGC------CA------GAGAATCGC-T-------T--------GAG-C-C----CAGGA---GTTT-G-AGAC-CAG-CC-T--AGGCAA-T-ACA-G-TGAG-A----CAC-CATCTCTA-------------------------------
>AluJo_513
---------------------------------------------------GCCAG--GC---ACAGTGGCTC-ATGCC----TG-T-AAT------TC----CAGC-A-C-TT-TGTGAA-GCC----AG---GGC------AG------GAGGATTGC-T-------T--------GAG-C-C----CAGGA---GTTA-C-AGAC-CAG-CC-T--GGGTAA-C-ATA-G-TGAG-A----CCT-TTTCTCTA-------------------------------
>AluJo_514
--------------------------------------------------GGCTGG--GT---GTGGTGGTTC-ATGCC----TG-T-AAT------CC----CAGC-A-C-TT-TGGGAG-GTG----GA---GGT------GG------GAGGACTGC-T-------T--------GAG-C-T----CA-AA---GTTT-G-AGAC-CAG-CC-T--GGACAA-T-ATA-G-TGAG-A----CCT-CATCTCTA-------------------------------
>AluJo_515
---------------------------------------------------GCTGG--GT---GTGGTAGTTC-ATGCC----TA-T-AAT------CT----CAGC-A-C-TT-TGGGAG-GCT----GA---GGT------GG------AAGGATCAC-T-------T--------GAG-T-C----CAGGA---GTTT-G-AGAC-CAG-CC-T--GGACAA-C-ATA-G-TGAG-A---CCCC-TGCCTCT--------------------------------
>AluJo_516
---------------------------------------------------GCTGG--GC---GCTGTGGCTC-AGGCC----TG-T-AAT------CC----CAGC-A-G-TT-TGGGAG-ACT----GA---GGC------AG------GAGGATTGC-T-------T--------GAG-C-C----CAGGA---GATT-G-AGGC-GAG-CC-T--GGGCAA-T-ATA-A-TGAG-A----CCC-CATCTCTA-------------------------------
>AluJo_517
---------------------------------------------------GCCAG--GC---ATGGTGGCTC-ACACC----CG-T-AAT------CC----CAGC-A-C-TT-TGGGAG-GCT----GA---GGC------AG------GAGGATCGC-T-------T--------GAG-T-C----CAGGA---GTTA-G-AGTC-CAG-CC-T--GGGCAA-C-ATA-G-TAGG-A----CCC-CATCTCCA-------------------------------
>AluJo_518
--------------------------------------------------GGCCAG--GT---GCAGTGGCTC-ACACC----TG-T-AAT------CC----CAGC-A-C--T-TGGGAG-GAA----GA---GGT------GT------GAGGATCAC-T-------T--------GAG-C-T----CAGGA---GTTT-G-AGAC-CAG-CC-T--GGGCAA-C-ATA-G-TGAG-A----TCT-CATCTCTA-------------------------------
>AluJo_519
---------------------------------------------------GCCAG--GT---GCAGTGGCTC-ACACC----TG-T-AAT------CC----CAGC-A-C-TT-TGGGAG-ACC----AA---AGT------AG------GAGGATTGC-T-------T--------GAA-C-T----CAGGA---GTTT-G-AGAC-CAG-TC-C--GGGCAA-C-ACA-G-TGAG-A----CCC-CATCTCTA-------------------------------
>AluJo_520
---------------------------------------------------GTCAG--GT---GTGGTGGCTC-ATGCC----GG-T-AAT------CC----TAGC-A-C-TT-TGAGAG-GCT----GA---GGA------GG------GAAGATCAC-T-------T--------GAT-C-C----CTGGA---GTTT-G-AGAC-CAG-CC-T--GGGCAC-C-ATA-G-TGAG-A----CCC-TGTTTCTA-------------------------------
>AluJo_521
---------------------------------------------------GCCAG--GC---AGGGTGGTTC-ATACC----TG-T-AAT------TC----TAGC-A-C-TT-TGGGAG-GCC----AA---GGC------AG------GAGGATCGC-T-------T--------GAG-C-C----CAGGA---GTTC-G-AGAG-CAG-CC-T--AGGCAA-C-ATG-G-TGAG-A----CCC-TGTCTCTA-------------------------------
>AluJo_522
---------------------------------------------------GCCAG--GT---GCAGGGGCTC-ATAGC----TA-T-AAT------CC----CAGC-A-C-TT-TGGGAG-GCC----AA---GGT------GG------GAGAATCAC-T-------G--------GAG-C-T----CAGGA---GTTC-A-AGAC-CAA-CC-T--GGGCAA-C-ATA-G-TGAG-A----CCC-TGTCTCTA-------------------------------
>AluJo_523
---------------------------------------------------GCCGG--GT---GTCGTGGCTC-ATGCT----TT-T-AAT------CC----CAGC-A-C-TT-TGGGAG-GTT----TA---GGT------GG------GAGGATTGC-T-------T--------GAG-C-A----CAGGA---GTTC-C-AGAC-CAG-CC-T--GGGCAA-C-ACA-G-CAAG-A----CCC-CATCTCTA-------------------------------
>AluJo_524
---------------------------------------------------GCCAT--AT---GCTGTGGCTC-ATGCC----TG-T-AAT------CC----CAGC-A-C-TT-TGGGAG-GCT----GA---GGC------AG------GAGGACTGC-T-------T--------GAG-C-C----CAGGA---GTTC-A-CGAC-TAG-CC-T--GGGCAA-C-ATA-G-GGAG-A----CCC-CATTTCTA-------------------------------
>AluJo_525
---------------------------------------------------------------GCAGTAGCTC-ACTCC----TG-T-AAT------CC----CAGC-A-C-TT-TGGGAG-GCT----GA---GGC------AG------AAGGGTTGC-T-------T--------GAG-C-C----GAGGA---GTTG-A-AGAC-CAG-CC-T--AGGCAA-C-GTG-G--GAA-A----CCC-CATCTATACAAAAAAT-----------------------
>AluJo_526
--------------------------------------------------GGCTGG--GT---GCAGTGGTTC-ATGCC----TG-T-AAT------CC----CAGC-A-C-TT-TGGGAG-GCC----AA---GGC------AG------GAGGATTGC-T-------T--------GAG-C-C----CA-------------AGAC-TAG-CC-T--GAGTAA-C-ATA-G-TGAG-A----CTC-TGTCTCTACAGAAAA------------------------
>AluJo_527
--------------------------------------------------GGCCAG--GT---GTAGTGGTTT-ACACC----TG-T-AAT------CC----CAGC-A-C--T-TGGGAG-TCC----GA---GGC------AG------AAGGATCAC-T-------T--------GAG-C-C----CAGGA---GTTC-A-AGAC-CAG-CC-T--G-GCAA-C-ATG-G-CGAG-A---CCCC-CATCTCTA-------------------------------
>AluJo_528
----------------------------------------------------CCAG--GC---ATGGTGGCTC-ACGCC----TA-T-AAT------CC----TAGC-A-C-TT-TGGGAG-GCT----GA---GGC------AG------GAGGATTGC-T-------T--------GAG-C-T----CAGGA---GTTG-G-AGAC-CAG-CC-T--GGGCAA-C-ATA-G-TGAG-A---CCCC-TGTCTCCA-------------------------------
>AluJo_529
---------------------------------------------------GCCAG--GC---ATGGTGGCTC-ACGCC----TG-TAAAT------CC----CAGC-A-C-TT-TGGGAT-GCC----AA---GGC------AG------TAGGATTGC-T-------T--------GAG-C-C----CAGGA---GTTG---AGAC-CAG-CC-T--AGGCAA-C-ATA-G-TGAG-G-----CCTTGTCTCTA-------------------------------
>AluJo_530
--------------------------------------------------GGCTGG--GC---ATGGTGGCTC-ACACC----TG-T-AAT------CC----TAGC-A-CATT-TGGGAG-GCT----GA---GGC------AG------GAGAATTGC-T-------T--------AAG-C-A----CAGGA---GTTC-A-AGAC-CAT-CC-T--GGGCAA-C-AAA-G-TGAA-A-----CC-TGTTTCT--------------------------------
>AluJo_531
--------------------------------------------------GGCTGG--GT---GCGGTGGCTCGATGCT----TG-T-AAC------CC----TAGC-A-C-TT-TGGGAG-GCT----GA---AGT------GG------GTGGATTGC-T-------T--------AAG-T-C----CAGGA---GTTT-G-AGAC-C-G-CC-T--GGGCAA-C-GTA-G-GAAG-A----CCC-CATCTCT--------------------------------
>AluJo_532
---------------------------------------------------GCCGG--GT---GCAGTGGCTC-ATGCT----TG-T-AAT------CC----CAGC-A-C-TT-TGGGAG-GCC----AA---TGT------GA------GAGGATTGC-T-------T--------GAG-C-C----CAGGA---GTTC-A-AGAC-CAG-CC-T--TGGCAA-C-GTA-G-CGAG-A----CCC-CATCTCTA-------------------------------
>AluJo_533
---------------------------------------------------GCCAG--GC---TCAGTGGCTC-ATGCC----TG-T-AAT------TC----CAAC-A-C-TT-TGGGAG-GCC----AA---GGC------GG------GCAGACTGC-T-------T--------GAG-C-C----CAGGA---GTTT-G-AGAC-CAG-CC-T--GGGCAA-C-ATA-G-TGAG-A---CCCC-CATCTCT--------------------------------
>AluJo_534
--------------------------------------------------GGCTGC--GT---GCCATGGTTC-ACGCC----TG-T-AAT------CC----CAGC-A-C-TT-TGGGAG-GCT----GA---GGA------CA------GAGGATTGC-T-------T--------GAG-C-C----CAGGA---GTTC-G-AGGC-CAG-CC-T--GGGCAA-C-ATA-G-TGAG-A----CCC-TGTCTCT--------------------------------
>AluJo_535
---------------------------------------------------GCCGG--GT---GGGGTGGCTC-ACGCC----TG-T-GAT------CC----CAGC-A-C-TT-TGGGAG-GCG----GA---GGT------GA------GAGGACTGC-T-------T--------GAG-C-C----CAGGA---GTTT-G-AGAC-CAG-CC-T--GGGCAA-C-ATA-G-CAAG-A----CCT-TGTATCTA-------------------------------
>AluJo_536
---------------------------------------------------GCCAG--GT---GCAGTGGCTC-ATTCC----TG-T-AAT------CC----CAGC-A-C-TT-TGGGGG-GCC----AA---GAG------GG------GAGGATCCC-T-------G--------GAG-C-C----CAGGA---GTTT-G-AGAC-CAG-CC-T--GGGCAA-C-ATA-G-TGAG-A----CCC-CACCTCTA-------------------------------
>AluJo_537
--------------------------------------------------GGCTGG--GT---GCGGTGGCTC-ATGCC----TG-T-AAT------CC----CAGC-A-C-TT-TGGGAG-GCT----GA---GGC------AG------AAGGATAGC-T-------T--------GAG-C-C----TAGGA---GTTT-G-AGAC-CAG-CC-C--GGGCAA-C-AAA-G-CGAG-A----CTC-TGTCTCT--------------------------------
>AluJo_538
--------------------------------------------------GGCTGG--GC---ACAGTGGCTC-ATGCC----TA-T-AAT------CC----CAGC-A-C-TT-TAGGAG-GCT----GA---GGT------GG------GAGAATCAC-T-------T--------GAA-C-C----CAGGA---GTTC-G-AGAC-CAG-CC-T--GGGAAA-T-ATA-G-CGAG-A----CCT-CATCTCT--------------------------------
>AluJo_539
---------------------------------------------------GCCAG--GT---GCAGTGGCTC-ATGCC----TG-T-AAT------CC----CAAGCA-C-TT-TGGAAG-GCC----AA---GGT------GG------GAGGACTGC-T-------T--------GGG-C-C----CAGGA---GTTC-A-AAAC-CAG-CC-T--GGGCAA-C-ATA-C-TAAG-A-----CC-CCACTCTA-------------------------------
>AluJo_540
--------------------------------------------------GGCCAG--GC---ATGGTGGCTC-ACACC----TG-T-TAT------CC----TAGC-A-C-TT-TG-AAG-GCT----GG---GGC------AG------GAAGATTGC-T-------T--------CAG-C-C----CAGGA---GTTC-A-AGAC-CAG-CC-T--GGGCAA-C-ATA-G-TGAG-A----CCC-TGTTTCTA-------------------------------
>AluJo_541
--------------------------------------------------GGATGG--GT---GCAGTGGCTC-ATGCC----TG-T-AAT------CC----CAGC-A-C-TT-TGGGAG-GCT----GA---GGC------TG------GCGGATTGC-T-------T--------GAG-C-T----CAGGA---GTTC-G-AGAC-CAG-CC-T--GGGCAA-C-AAG-A-CAAA-A----CCC-CGTCTCT--------------------------------
>AluJo_542
--------------------------------------------------GGCTGA--GT---GTGGTGGCTC-ATGCC----TG-T-AAT------CC----CAGC-A-C-TT-TGGGAG-GCC----GA---GGT------GG------GCGGACTGC-T-------T--------GAG-C-C----CAGAT---GTTC-A-AGAC-CAG-CC-T--GGGCAA-C-ATG-G-CAAA-A----CCC-TGTCTCT--------------------------------
>AluJo_543
---------------------------------------------------------------GCAATGGTCC-ATGCC----TG-T-AAT------CC----CAGC-T-C-TT-TGGGAG-GCC----AA---GGT------GG------GAGGATTGC-T-------T--------GAG-C-C----CAGGA---GTTC-A-AGAC-CAG-CC-T--GGGCAA-T-ATA-G-TGAG-A----ACC-TATCTCTACAAAAAA------------------------
>AluJo_544
--------------------------------------------------GGCCAG--GT---GTAGTGGCTC-ACTCC----TG-T-AAT------CC----CAGC-A-C-TT-TGGGAG-GCT----GA---GGC---------------AGGATTGC-C-------T--------GAG-C-C----CAGGA---GTTC-A-AGGC-CAG-CC-T--AAGCAA-C-ATG-G-CAAA-A-----CCCCATCTCTACC-----------------------------
>AluJo_545
--------------------------------------------------GGCCAA--GT---GTGGTGGCTC-ATGCC----TG-T-AAT------CC----TAGC-A-C-TT-TGGGAG-GCT----GA---GGC------AG------GCGGATTGC-T-------T--------GAG-C-T----CAGGA---GTTC-A-AGAC-CAG-CC-T--GGGCAA-C-ATG-G-CAAA-A----CCC-CATCTCT--------------------------------
>AluJo_546
--------------------------------------------------GGCTGG--GT---ATGGTGGCTC-ACACC----TG-T-AAT------CC----CAGC-A-C-TT-TGGGAG-GCT----GA---GG-------AG------GAGGATTGC-T-------T--------GGG-C-C----CAGGA---GTTC-A-AGAC-CAG-CC-T--GGGCAA-T-ATA-G-CAAG-A----CTC-TGTCTCTA-------------------------------
>AluJo_547
--------------------------------------------------GGCTGG--GT---GTGGTGGCTC-TCACC----TG-T-AAT------CC----CAGC-A-C-TT-TGGGAG-GCT----GA---GGC------TG------GCAGATTGC-T-------T--------GAG-C-C----CAGGG---GTTC-A-AGAC-CAG-CC-T--GAGCAA-C-ATA-G-GGAA-A----CCC-TGTCTCT--------------------------------
>AluJo_548
------------------------------------------------------GG--GT---GTGGTGGCTC-ACACC----TG-T-AAT------CC----CAGC-A-C-TT-TGGGAG-GCT----GA---GGC------AG------GCAGATTGC-T-------T--------GAG-C-C----CAGGA---GTTC-A-AGAC-CAG-CC-T--GGGAAA-C-ATG-G-CAAA-A----ACC-TGTCTCTACAA----------------------------
>AluJo_549
--------------------------------------------------GGCTGG--GT---GCAGTGTTTC-ACGCC----TG-T-AAT------CC----CAGC-A-G-TT-TGGGAA-GCT----GA---GGT------GG------GAGGATCAC-T-------T--------GAG-T-C----CAGGA---GTTC-G-AGAC-CAA-CC-T--GGGCAA-C-ATA-G-TGAG-A----CCT-CATCTCT--------------------------------
>AluJo_550
--------------------------------------------------GGCTGG--GT---GCAGTGTTTC-ACGCC----TG-T-AAT------CC----CAGC-A-G-TT-TGGGAA-GCT----GA---GGT------GG------GAGGATCAC-T-------T--------GAG-T-C----CAGGA---GTCC-G-AGAC-CAA-CC-T--GGGCAA-C-ATA-G-TGAG-A----CCT-CATCTCT--------------------------------
>AluJo_551
--------------------------------------------------GGCCGG--GT---GCAGTGGCTC-ATGCC----TG-T-AAT------CC----CAGC-A-C-TT-TGGGAG-GCG----GA---GGT------GG------AAGGATTGC-T-------T--------GAG-C-C----CAGGA---GTTC-A-AGAC-CAG-CC-T--GGGCAA-T-ATA-G-GGAG-A----TCC-TGCCTCT--------------------------------
>AluJo_552
--------------------------------------------------GGCTGG--GT---GCGGTAGCTC-AGGCC----TG-T-AAT------CA----CAGC-A-T-TT-AGGGAG-GCT----GA---GGT------GG------GAGGATTGC-T-------T--------GAG-C-C----CAGGA---GTTC-A-AGAC-CAG-CC-T--GGGCAA-C-ATA-G-TGAG-A----CCT-TATCTTT--------------------------------
>AluJo_553
--------------------------------------------------GGCCAG--GT---GCAGTTGCTC-ATGCC----TG-T-AAT------CC----CAGG-A-C-TT-TGGGAG-GCC----AA---GAT------GG------GAGAACTGC-T-------T--------GAG-C-C----CAGGA---GTTT-C-AGAC-CAG-CC-T--GGGCAA-C-ATA-G-TGAG-A----CCC-CATCTCT--------------------------------
>AluJo_554
--------------------------------------------------GGCCAG--GA---GCGGTGGCTA-ATGCC----TG-T-AAT------CC----CAGC-A-C-TT-TGGGAG-GCT----GA---GG-------GG------GCAGATTGC-T-------T--------GAG-C-C----CAGGA---GTTC-A-AGAC-CAG-CC-T--GGGCAA-C-ATA-G-TGAG-A----CCT-CATCTCTA-------------------------------
>AluJo_555
--------------------------------------------------GGCTGG--GT---GCAGTGGCTC-ATGTC----TC-T-AAT------CC----CAGC-A-C-CT-TAGGAG-GCT----GA---GGC------AG------GAGGATCAC-T-------T--------GAG-C-C----CAGGA---GTTT-G-AGAC-CAG-CC-T--GGGCAA-C-CTA-G-TGAG-A----CCC-TGTCTCT--------------------------------
>AluJo_556
--------------------------------------------------GGCCAG--AT---GTGGTGGCTC-ATGCC----TG-T-AAT------CC----CAGC-A-C-TT-CG-GAG-GCC----GA---GGT------GA------GAGGACTGC-T-------T--------GAG-C-C----CAGGA---GTTT-G-AGAC-CAG-CC-T--GGGCAA-C-ATA-G-TGAG-A----CCT-CATATTTA-------------------------------
>AluJo_557
--------------------------------------------------GGCTGG--GT---CTGGTGGCTC-ACACC----TA-T-AAT------CC----CAGC-A-C-TT-TGGGGG-GCC----AA---AGT------GG------GAGGATTGC-T-------T--------GAG-C-C----CATGA---GTTT-G-AGAC-CAG-CC-T--GGGCAA-C-ATA-G-TGAG-A----CCT-CATCTCT--------------------------------
>AluJo_558
--------------------------------------------------GGCTGG--GT---CTGGTGGCTC-ACACC----TA-T-AAT------CC----CAGC-A-C-TT-TGGGGG-GCC----AA---AGT------GG------GAGGATTGC-T-------T--------GAG-C-C----CATGA---GTTT-G-AGAC-CAG-CC-T--GGGCAA-C-ATA-G-TGAG-A----CCT-CATCTCT--------------------------------
>AluJo_559
--------------------------------------------------GGCTGG--GT---ATGGTGGCTC-ACGCC----TG-T-AAT------CC----CAGC-A-C-TT-CGGGAG-GCT----GA---AGC------AG------GAGGATTGC-T-------T--------GAG-C-C----CAGGA---GTTC-G-AGAC-CAG-CC-T--CGGCAA-C-ATA-G--GAG-A----CCC-CATCTCTA-------------------------------
>AluJo_560
--------------------------------------------------GGCCAG--GT---GTGGTGGCTC-ACACC----TG-T-AAT------CC----TAGC-A-C-TT-TGAGAG-GCT----GA---GGC------AG------GAGGATTGC-T-------T--------GAG-C-C----CAGGA---GTTT-G-AGAC-CGG-CC-T--GGGCAA-C-ATA-G-TGAG-A----CCC-CATGTCT--------------------------------
>AluJo_561
---------------------------------------------------GCTAG--GC---ATGGTGGCTC-ATGCC----TG-T-AAT------CC----CATC-A-C-GT-TGGGAG-GCT----GA---GGC------AG------GAGGACTGT-T-------T--------GAG-C-C----CAGGA---GTTT-G-AGAC-CAG-CC-T--GGGCAA-C-ATA-G-TGAC-A----CCC-TGTCTCTA-------------------------------
>AluJo_562
--------------------------------------------------GGTTGG--GT---GTGGTGGCTC-ATGCC----TG-T-AAT------CC----CAGC-A-C-TT-TGGGAG-GCT----GA---GGT------GG------GAGGAACAC-T-------T--------GAG-C-C----CAGGA---GTTT-C-AGAC-CAA-CC-T--GTGCAA-C-ATA-G-TGAG-A----CCC-TGTCTCT--------------------------------
>AluJo_563
--------------------------------------------------GGCCAG--GT---GTGGTGGCTC-ATGGC----TG-T-AAT------CC----CAGC-A-C-TT-TGGGAG-GCT----GA---GGT------GG------GAGGATCAC-T-------T--------GAG-C-C----CAGGA---GTTT-G-AGAC-CAG-TC-T--G-GCAA-C-ATA-G-TGAG-G----CCC-TGTCTCTA-------------------------------
>AluJo_564
--------------------------------------------------GGCTGG--GG---GCAGTGGCTC-ATGCC----TG-T-AAT------CG----CAGC-A-C-TT-TGGGAG-GCT----GA---GGC------GG------AAGGATCAC-T-------T--------GAG-C-C----CAGGA---GTTT-G-AGAC-CAG-CC-T--GGGCAA-C-ATA-G-TGAG-A----ACC-GGACTCT--------------------------------
>AluJo_565
---------------------------------------------------GCTGG--GC---ACAGTGGCTC-ATGCC----TA-T-AAT------CC----CAGC-A-C-TT-TGGGAG-GCC----AA---GGT------AG------GAGGATCGC-T-------T--------GAG-C-C----CAGGA---GCTC-A-AGAC-CAG-CC-T--GGGCAA-C-ATA-G-GGAG-A----CCT-TGTCTCTA-------------------------------
>AluJo_566
---------------------------------------------------GCCAG--GT---GCCGGGGCTC-ATGCC----TA-T-AAT------CC----CAGC-A-C-TT-TGGGAG-GCT----TA---GGT------GG------GAGGACTGC-T-------T--------GAG-C-C----CAGGA---GTTC-A-AGAC-CAG-CC-T--GGGCAA-C-ATA-G-TGAG-A----CCC-TATCTCTA-------------------------------
>AluJo_567
--------------------------------------------------GGCTGG--GT---GTGGTGTCTC-ACACT----TG-T-AAT------CC----CAGC-A-C-TT-TGGGAG-GCT----GA---AGT------GG------GAGGATTGT---------T--------GAG-C-T----CAGGA---GTTT-G-AGAC-CAG-TC-T--GGGCAA-C-ATA-G-TGAG-A-----CCCCATCTCTA-------------------------------
>AluJo_568
--------------------------------------------------GGCTGA--GT---GCAGTGGCTC-ATGCC----TG-T-AAT------CC----CAGC-A-A-TT-TGGGAG-GCC----GA---GGT------GG------GTGGATCGC-T-------T--------GAG-C-C----CAGGA---GTTC-G-AGAC-CAG-TC-T--GGCCAA-C-ATA-G-TGAA-A----CCC-CATCTCT--------------------------------
>AluJo_569
---------------------------------------------------GCCAG--GT---GTGGTGGCTC-ATGCC----TG-T-AAT------CC----CAGC-A-C-TT-TGGGAG-GCC----GA---GGC------GG------GAGGATTGT-T-------T--------GAG-C-C----CAGGA---GTTT-G-AGGC-CAG-CC-T--GGGCAA-C-ATA-G-TGAG-A----CCC-TATCTCTA-------------------------------
>AluJo_570
--------------------------------------------------GGCTGG--GC---ACAGTGGCTC-ATGCC----TG-T-AAC------CC-----AGC-A-C-TT-TGGGAG-GCT----AA---GGT------GG------GAGGATTGC-T-------T--------GAG-C-C----CAGGA---GTTT-G-AGAC-CAG-CC-T--GGGTAA-C-ATA-A-GGAG-A-----CCCTGTCTCTA-------------------------------
>AluJo_571
--------------------------------------------------GGCTGG--GC---GCAGTGGTTC--AGTC----TG-T-AAT------CC----CAGC-A-C-TT-TGGGAG-GCT----GA---GGT------GG------GAGAATCGC-T-------T--------GAG-C-C----CAGGA---GTTT-G-AGAC-CAG-CC-T--GGGCAA-C-ACA-G-TGAG-A-----CCTCATCTCTA-------------------------------
>AluJo_572
--------------------------------------------------GGCTGG--GT---GCAGTGGCTC-ATGCC----TG-T-AAT------CC----CAGC-A-C-TT-TGGGAG-GCT----GA---GGT------GG------GAGGATTGC-T-------T--------GAG-C-C----CAGGA---GTTT-G-AGAC-CAG-CC-T--GGGCGA-C-ATA-G-TGAG-A-----CC-CATCTCTA-------------------------------
>AluJo_573
-----------------------------------------------------CAG--GC---ATGGTAGCTT-ACACA----TG-C-AAT------CC----CAGC-A---TT-TGGGAG-GAC----AA---AGT------GG------GGGGATC---T-------T--------GAG-C-C----CAGGG---GTTC-A-AAAC-CAG-CC-T-----GAA-C-ATA-G---------------CGACTTTACAAAAAACTATTAAAA---------------
>AluJo_574
--------------------------------------------------GGCTAG--GC---ACAGTGGTTT-ATGTC----TC-T-AAT------TC----CAAC-A-C-TT-TGGGAG-GCT----GA---GAC------AG------GAGAATTGC-T-------C--------AAG-C-T----CTGGA---ATTG-G-ATAC-TAG-CC-T--GAGCAA-T-GTA-G-GGAG-A---C-CC-TTTCTCT--------------------------------
>AluJo_575
----------------------------------------------------CCGA--GT---GCAGGGGCTT-ATGCC----TG-T-AAC------CC----CAGC-T-C-TC-TGAGAG-GCC---AAG---GGC------AT------GGGGGTCGC-T-------T--------GAG-T-C----TGGGA---GTTT-T-AGAC-CAG-CC-T--GGGCAA-C-ACA-G-TGAG-A---C-CC-TATCTCTA-------------------------------
>AluJo_576
---------------------------------------------------GCCAG--GG---GTGGTGGCTC-ATACT----TG-T-AAT------CC----GAAC-A-C-TT-TGAGAA-GTC----AA---GAC------AG------GAGAATCAC-T-------T--------GAA-C-C----TAGAA---GTCC-G-AGAC-CAA-GC-T--GGACAA-C-ATA-G-GGAG-A---C-CC-TCTCTCTA-------------------------------
>AluJo_577
--------------------------------------------------GGCCAC--GC---ACGGTGGCTC-ATGCC----TG-T-AAT------AC----CAGA-A-T-TT-CGGGGG-GCC----AA---AGC------AG------GAGAATCCC-T-------T--------GAG-C-C----CAGGA---GTTC-A-AGAC-CAG-AC-T--GAGCAA-C-AAA-G-CAAG-A---C-CC-TGCCTCT--------------------------------
>AluJo_578
--------------------------------------------------GGCCAG--AC---ACACTGGCAC-ATGCT----TG-T-AAT------CC----CAGC-A-C-TT-CGGGAG-GCC----AA---GGC------AG------GCAGATTGC-T-------T--------------------------------G-AGAC-CAG-TC-T--AGGTAA-C-ATA-G-CGAG-A---CTCC-TGCCTCTACAAAAAATAAAA-------------------
>AluJo_579
---------------------------------------------------GCTGG--AC---ACAGTGACTC-AGACC----TG-T-AAT------CC----TAGG-A-C-TT-TGTAAG-GCT----GA---GGT------GG------GAAGATCAC-T-------T--------GAG-C-C----CAGGA---GTTT-G-AGAC-AAA-TC-T--GGACAA-C-AAA-G-TGAG-A---C-CC-TGTCTCTA-------------------------------
>AluJo_580
-----------------------------------------------------CAG--GC---ATGGTGGTGC-ATGCC----TG-T-AAT------CC----CAGC-A-C-TT-TGGGAG-GCTTTGGGA---GGCCAAGCAGG------GAGGATCAT-T-------T--------GAG-C-C----ATAGA---GTTC-A-AGAC-CAG-CC-T--GGAAAA-C-AAA-G-TGAG-A---C-TC----------------------------------------
>AluJo_581
---------------------------------------------------GCTAG--AC---AAGATGGCTC-ACACCTGTATG-T-AAT------CC----CAGC-A-C-TT-TGGGAG-GCT----GA---GAC------AG------GAGGAGCAC-T-------T--------GGT-A-C----CCAGA----------AGAT-CAC-TC-T--GGGTAA-C-ATA-G-TGAG-A---C-TC-TGTCTCTAC------------------------------
>AluJo_582
--------------------------------------------------GGGCGG--GC---ATGGTGGCTC-ATGCC----TG-T-AAT------CC----CAGC-A-C-TT-TGGGAG-GCA----GA---GGC------AG------GAAGATCCA-T-------T--------GAG-C-C----CAGGA---ATTC-A-AGAC-CAG-GC-T--GGACAG-C-ATA-A-GGAA-A---C-CC-TATCGCT--------------------------------
>AluJo_583
---------------------------------------------------GTCAA--GC---AGGGTGGCTC-ACACC----TG-T-AAT------CC----CAGC-A-A-TT-CAGGAG-GCC----AG---AGT------GG------GAGGATCAC-T-------T--------AAG-C-C----CAGGA---GTTT-G-AGAC-CAG-CC-T--GGGCAA-C-ATA-G-TGAG-G---C-CC-GGTTTCTA-------------------------------
>AluJo_584
--------------------------------------------------GGCCGG--GT---GTGAGTCTTC-ATGCC----TA-T-AAT------CC----TAGC-A-G-TT-TGGGAG-GCT----GA---GGC------AG------GAGGATACT-T-------T--------TAG-C-C----CAGGA---GTTC-G-AGAC-CAG-CC-T--GGGCAA-C-ATA-G-GGAG-A---C-CC-AGTCTCT--------------------------------
>AluJo_585
--------------------------------------------------GACCAG--GT---GCAGTGGCTC-ATACC----TG-T-AAT------TC----CAGC-A-C-TT-TGGGAG-GCC----GG---GGT------AG------GAGGATCAC-T-------T--------GAG-C-C----TAGAA---GTCC-G-AGAC-CAG-CC-T--GGCCAA-C-ATA-G-TGAG-A---A-CA-TGTTTCT--------------------------------
>AluJo_586
---------------------------------------------------GCCTG--GC---ATGGTGGCTC-ATACC----TG-T-AAT------CC----TAGC-A-C-TT-TGGGAG-GCT----GA---GAC------AG------GAGGATTGT-T-------T--------GAG-C-T----CAGGA---GTTT-G-AAAC-CAG-TC-T--GGGCAA-T-GTA-G-TAAG-G---C-CT-CATCTTTA-------------------------------
>AluJo_587
--------------------------------------------------GGCCAG--G------AGTGGCTC-ATGCC----TA-T-AAC------CC----CAAC-A-T-GT-TGGGAG-ACT----GA---GGC------AG------GAGGATCAC-T-------T--------GAG-C-------AAAA---GTTC-A-AGAC-CAG-CC-T--GAGCAA-C-A---G-GGAG-A---C-CC-TGGCTTTACAAAAA-------------------------
>AluJo_588
--------------------------------------------------GGCCAG--GC---ATGATGGCTC-ATGCC----GG-T-AAT------TT----TAGC-A-C-TT-TGGGAG-GCT----GA---GGT------GG------GAGGATCAC-T-------T--------GAA-C-G----CAGGA---GTTT-A-AGAC-CAT-CC-T--GGGTAA-C-ATA-G-TGAG-A---T-CC-TGTCTTT--------------------------------
>AluJo_589
--------------------------------------------------GGC-TG--GG---ACAGTGGCTC-ATGCC----TG-T-AAT------CC----TAGC-A-C-TT-TGAGGG-GCT----GA---GGC------AG------GAGGACTGG-T-------T--------GAG-C-C----CAGGA---GTTT-G-AGAC-CAG-CC-A--GGGCAA-C-ATA-G-TGAG-A---C-CT-CATCTTTA-------------------------------
>AluJo_590
--------------------------------------------------GGCTTG--GT---GTAGTGGCTC-ATGCC----TG-T-AAT------CC----TAGC-A-C-TT-TGGGAG-ACA----AA---GGC------AG------GAGGATTGT-T-------T--------GAG-C-C----CAGGA---GTTT-G-AGAC-CAG-CC-A--GAACAA-C-ATA-G-TGAG-G---C-CT-CATCTCT--------------------------------
>AluJo_591
--------------------------------------------------GGCCAG--GT---ACGGTGGCTC-ATGCC----TG-T-AAT------CC----CAGC-A-C-TT-TGGAAG-GCC----AA---GGC------AG------GGGAATTGC-T-------C--------AAG-C-C----CAGGA---GTTT-G-AGAC-CAG-CC-T--GGGTGA-C-AGA-G-CAAG-A---C-CC-TGTCTCT--------------------------------
>AluJo_592
--------------------------------------------------GGCCAG--GT---GCGGCGACTC-ATGCC----TG-T-GAT------CC----AAGC-A-C-TT-TGGGAG-GCT----GA---GGC------AG------GAGGACCAA-T-------C--------GAG-C-A----CAGCG---GTTC-ACAGAC-CAG-CC-T--GGGCAA-T-ATA-G-TGAG-A---C-CC-TGTCTC---------------------------------
>AluJo_593
--------------------------------------------------GGCCAG--GC---TCTGTGGACC-ACACC----TG-G-AAG------CC----CAAT-A-C-TT-TGGGAG-GCC----AA---GGC------AA------GAGGATTGC-T-------T--------GAG-T-C----CAGCA---GTTT-G-AGAC-CAG-CC-T--AGGCAA-C-ATA-G-CAAG-A---C-CC-TGTCTCT--------------------------------
>AluJo_594
--------------------------------------------------GGCCAT--GC---ATGGTGGCTC-ATTCC----TG-T-AAT------CC----CAGC-A-C-TG-TGGGAA-GCT----GA---GGC------AG------GAGGATCAC-T-------T--------GAG-C-C----CAGGT---GCTC-G-AGAC-CAG-CC-T--GGGCAA-C-ACA-G-CAAG-A---C-CC-CTTATCT--------------------------------
>AluJo_595
--------------------------------------------------GGCCAG--GC---ATAATGGCTC-ATGCC----TG-T--AT------CC----CAGC-A-C-TT-TGGGAG-GCC----GA---GGC------AG------GAGGATTGC-T-------T--------GAG-C-C----TAGGA---GTTT-G-AGAC-TAG-CC-T--GGGTAA-C-GGA-G-CAAC-A---G-CC-TGTCTCTA-------------------------------
>AluJo_596
--------------------------------------------------GGCCTG--CT---GCAGTGGCTC-ACACC----TG-C-AAT------TC----CAAC-A-C-TT-TGGGAG-GCT----GA---GGC------AG------GAGGAGGGC-T-------T--------GAG-C-C----CAGGA---GTTT-G-AGAC-CAG-CC-T--GGGCAA-C-ATA-G-GGAG-A---C-CC-TGCCTCT--------------------------------
>AluJo_597
--------------------------------------------------GGCCAG--CC---ACGGTGGCTC-ACACC----TC-T-AAT------CC----CAGA-A-C-TT-TGGGAG-GCC----AC---AGC------AG------GAGAATTGT-T-------T--------GAG-C-T----CAGGA---GTTC-A-AGAT-TAG-CC-T--GGGCAA-C-ATA-G-CAAG-A---C-CC-TGTCTCT--------------------------------
>AluJo_598
---------------------------------------------------GCCAG--GT---GTGGTGGCTC-GTGCC----TG-T-AAT------CCTACTTAGC-A-C-TT-CGGGAG-GCT----GA---GAC------AG------GAGGATCTC-T-------T--------GAG-C-C----CAGGA---GTTC-G-AGAC-CAG-CC-T--GGGCAA-C-ATA-G-GGAC-A---C-CC-TGTC-----------------------------------
>AluJo_599
--------------------------------------------------GGCCGG--GC---ATGGTGGCTC-ATACC----TG-T-AAT------CC----TAGC-A-C-TC-TGGGAG-GCC----GA---GGC------AG------GAGGATCCC-T-------T--------TAG-C-C----CAGGA---GTTA-A-AGAC-CAG-CC-T--GGGCAA-C-ATA-G-GGAG-A---C-CC-TGTCTTT--------------------------------
>AluJo_600
--------------------------------------------------GGCCAG--GT---GTGGTGGCTC-ATGTC----TG-T-AAT------CC----TAGC-A-C-TT-TGGGAG-ACC----CA---GTC------AG------GAGGATCCC-T-------T--------TAG-C-C----CAGGA---GTTC-G-AGAC-TAG-CC-T--GGGCAA-C-ATA-G-GGAG-A---C-CT-CGTCTCT--------------------------------
>AluJo_601
--------------------------------------------------GGCCAG--GT---GTGGTGGTCC-ATGCC----TG-T-AAT------CC----TAGC-A-C-TT-TGGGTG-ACC----AA---GGC------AG------GAGGATCCC-T-------T--------GAG-C-C----CAGGG---GTTC-A-AGAC-CAG-CC-T--GGGCAG-C-ATA-G-GGAG-A---C-CC-TGTCTTT--------------------------------
>AluJo_602
--------------------------------------------------GGCCAG--GC---ACAGTGGCTC-ATATC----TC-T-AAT------CC----CAGC-A-C-TT-TGGGAG-GCT----GA---GGC------AG------GAGGATTGC-T-------T--------GAG-C-C----CAGGA---GTTC-G-AGAC-CAG-CC-T--GGGCAA-C-ATA-G-TGGG-A---C-CC-TATTTTT--------------------------------
>AluJo_603
--------------------------------------------------GGCCAG--TT---GTGGTGGCTC-ATGCC----TG-T-AAT------CC----TAGT-A-C-TT-TGGAAG-GCC----AA---GGC------AG------GAGGATCCC-T-------T--------GAG-C-C----TAGGC---ATTT-G-AGAC-CAG-CC-T--GGGCAA-C-AAA-G-GGAT-A---C-CC-TGTCTCT--------------------------------
>AluJo_604
---------------------------------------------------GCCAG--GC---GCGGTGGCTC-ATGCC----TG-T-AAT------CC----TAGC-A-C-TT-TGGGAC-GCC----AA---CGC------AG------GAGGATCCC-T-------T--------GAG-C-T----TAGGA---GTTT-G-AGAC-CAG-CC-T--GGACAA-C-ACA-G-GGAG-A---C-CC-TGTCTCTA-------------------------------
>AluJo_605
--------------------------------------------------GGCCAG--GC---ACGGTGGCTC-ATACC----TG-T-AAT------CC----CAGT-A-C-TT-TGGGAG-GCT----GA---GGC------AG------GAGGATCAC-T-------T--------GAG-C-A----CAGGA---GTTC-A-AGAC-CAG-CC-T--GGGTAA-C-ACA-G-TGAG-A---C-CC-TGTCTCT--------------------------------
>AluJo_606
---------------------------------------------------GCCAT--GC---ACAGTGGCTC-ATACC----TG-T-AAT------CC----CAGC-A-C-TT-TGGGGG-GCC----AA---GGT------AG------GAGGATCAC-T-------T--------GAG-C-C----CAGGA---GTTT-G-AGAC-CAG-CC-T--GGACAA-C-ACA-G-TGAG-A---C-CC-TGTCTCTA-------------------------------
>AluJo_607
--------------------------------------------------GACCAA--GC---ACAGTGGCTC-ATGCC----TG-T-AAT------CC----CAGC-A-T-TT-TGGGAG-GCC---AAA---GGC------AG------GAGGATCAC-T-------T--------GAG-T-C----CAGGA---GTTT-G-AGAC-CAG-CC-T--GGGCAA-C-ACA-G-TGAG-A---T-CC-TGTCCC---------------------------------
>AluJo_608
--------------------------------------------------GGCCAG--GC---ACAGTAGCTC-ATGCC----TG-T-AAT------CC----CAGA-A-C-TT-TGGGAG-GCT----GA---GGT------AG------GAGGATTGC-T-------T--------GAG-C-C----CAGGA---ATTT-G-AAAC-CAG-CC-T--GGGCAA-C-ATG-G-TGAG-A---C-CC-CGTTTCT--------------------------------
>AluJo_609
---------------------------------------------------GCCAG--GT---ACAGTGGCTC-ACGCC----TG-T-AAT------TC----CAGG-A-C-TT-TGGGAG-ACT----GA---GGT------AG------GAGGATTGC-T-------T--------GAG-C-C----CAGGA---ATTT-G-AGAC-CAG-AC-T--GGGCAA-C-ATA-G-AGAG-A---C-CC-TGTCTCTA-------------------------------
>AluJo_610
--------------------------------------------------GGCCAG--CC---TCAATGGCTC-ACTCC----TG-T-AAT------CC----CAAC-A-C-TT-TGGGAG-GCC----AA---GGC------AG------GAGGATTGC-T-------T--------AAG-C-C----CAGGA---GTTC-A-AGAC-CAG-CC-T--GGGCAA-C-ATA-G-CAAG-A---C-CC-TGTCTCT--------------------------------
>AluJo_611
---------------------------------------------------GCCAG--GC---GCAATGGCTC-ATGCC----TG-T-AAT------CC----CAGC-A-C-TT-TGGGAG-GCT----AA---GGC------AG------AAGGATTGC-T-------T--------GAG-C-C----CAGGA---ATGT-G-AGAC-CAG-CC-T--GGGCAA-C-ATC-G-CAAG-A---C-CC-TGTCTCTA-------------------------------
>AluJo_612
>AluJo_612.5
>AluJo_613
---------------------------------------------------------------GTGATGGTTC-AGGTC----AG-C-AAT------TC----CAGC-A-C-TT-TAGGAT-TCC----AA---GGC------AG------GCAGATTGC-T-------T--------GAGCC-C----CAGGA---GTTC-A-AAAC-CAG-CC-T--GGGCAA-T-GTA-G-AAAG-A---C-CT-TGTCTCTACCAAAA-------------------------
>AluJo_614
--------------------------------------------------GGCCAG--GC---ACAGTGGCTC-ATGTC----TG-T-AAT------TC----TAAC-A-C-TT-TGGAAG-GCC----AA---GAT------GG------GCGGATCGC-T-------T--------AAG-C-C----CAGGA---ATTC-G-AGAC-TAG-CC-T--GGGCAA--------------------AC-TGTCACTATAAAAAATAC---------------------
>AluJo_615
---------------------------------------------------GCTGG--GT---ATGGTGGCTC-ATGCC----TG-T-AAT------CC-----AGC-G-C-TT-TGGGAG-GCT----GA---CGT------GA------GAGGATCAA-C-------C--------TAG-C-C----TAGTA---GTTT-G-AGAC-CAT-CC-T--GGGCAA-C-ATG-G-CAAG-A---C-CT-TGCCCCTAC------------------------------
>AluJo_616
--------------------------------------------------GGCCAG--GC---TCAGTGGCTC-ACTCC----TG-T-AAT------CC----TAAC-A-C-CT-TTGGAG-GAC----AA---GGT------GG------GAAGATGGT-T-------T--------AAG-C-C----CAGAA---GTTC-A-AGCC-TAG-CT-T--GGGCAA-C-ACA-G-TGAG-A-----TC-TGTCTCTA-------------------------------
>AluJo_617
--------------------------------------------------GGCCCG--GC---ACGGTATCTC-ACACC----TG-T-AAT------CC----CAAT-A-C-TT-TGGGAA-GCC----GA---AGT------GG------GACGATCAC-T-------T--------GAG-C-C----CACGA---GTTC-A-AGAC-TAG-CC-A--GAGCAA-C-ATA-G-TGAG-A-----CC-CATCTTTA-------------------------------
>AluJo_618
---------------------------------------------------GCCTA--GT---ACAGTGGCTC-ATGCC----TG-T-AAT------CC----CAAC-A-C-TT-TGGGAA-GCA----AA---GAC------AG------GAGGATTGC-T-------T--------GAA-C-T----CAGGA---GTTT-G-AGAC-CAG-CC-T--GGGCAA-C-ACA-G-CGAA-A---C-TT-TGTCTCCA-------------------------------
>AluJo_619
--------------------------------------------------GGCCGG--GT---GCGGTGGCTC-ATGCC----TG-T-AAT------CT----CAAA-A-C-TT-TGGGAG-GCC----AA---GGT------GA------GAAGATCAC-T-------T--------GAG-C-C----CAGCA---GTTC-A-AAAC-CAG-CT-T--GGGCAA-T-ACA-G-TGAG-A---T-CT-AGTCTCT--------------------------------
>AluJo_620
---------------------------------------------------GCCAG--GT---GCGGTGGCTC-ATGTC----TA-T-AGT------CC----CAGC-A-C-TT-TTGGAG-GCC----AA---GGC------AG------AAGGATCAC-T-------G--------GAG-C-C----TGGGA---GTTC-A-AG-------CT-T--GGGTAT---------TGAG-A---C-CC-CGTCTCTACATTTAAAAA---------------------
>AluJo_621
--------------------------------------------------GGCCAG--GT---GTGGTGGCCC-ACGCC----TA-T-AAT------CT----TAGC-A-C-TT-TGGGAG-GCC----AA---GGT------GG------CAAGACTGC-T-------T--------GAG-C-T----CAAGA---CTTC-A-AGAACCAG-CT-T--GGGCAA-T-AAA-A-TAAG-A---T-CC-TGTCTC---------------------------------
>AluJo_622
--------------------------------------------------GGTCAA--GC---GAAGTGGTTC-ACACC----TG-T-AGT------CC----CAGC-A-C-TC-TGGAAG-GCC----AA---GGT------GG------GCAGATCAC-T-------T--------GAG-C-C----CAGGA---GTTC-A-AGAT-CAA-CC-A--GGGCAA-T-ATA-G-TGAG-A---T-CC-TATCTCT--------------------------------
>AluJo_623
--------------------------------------------------GGCCGG--AT---AAGGTGGCTC-ATGCC----TG-T-AAT------CC----CAAC-A-C-TC--ATAAG-GCA----GA---GGT------GG------GTGGATCGC-T-------T--------GAG-C-T----CAGGA---GTTT-G-AGAC-CAG-CC-T--GGGCAA-C-ATG-G-CAAG-A---C-CC-TGTCTGTA-------------------------------
>AluJo_624
--------------------------------------------------GGCCAA--GA---GTGGTGGCTC-ATGCC----TG-T-AAT------CC----CAAC-A-C-TT-TGGAAG-GCC----AA---GGT------GG------GAGGATTGC-T-------T--------GAG-T-C----CAAGG---GTTC-A-AGACTTGG-CT-T--GGGCAA-C-ATA-T-TGAG-A---C-TC-CATCTC---------------------------------
>AluJo_625
--------------------------------------------------GGCCAA--GC---ACGGTGGCTC-ATTCC----TG-T-AAT------CC----TAGC-A-T-TT-TGGGAG-GCT----GA---GAT------GG------AAGCATCGC-T-------T--------GAG-C-C----CAGGA---GTTC-A-AGAC-CAA-CC-T--GGGCAA-C-ACA-G-TGAG-A---C-CC-TATTTTT--------------------------------
>AluJo_626
--------------------------------------------------------------------GGCTT-ATGCC----TG-T-AAT------TC----CAGC-A-C-TT-TGGGAA-GCA----GA---GGT------GG------GAGGATCTT-T-------T--------GAA-C-T----CAGGA---GTTT-G-AGAT-CGG-CC-C--GAGCAA-C-ATA-G-TGAG-A---C-CT-TGTCTCTACACACAAAAATA-------------------
>AluJo_627
--------------------------------------------------GGCTGG--GC---ATGGTGGCTC-ATGCC----TG-T--AC------CC----CAGC-A-C-TT-AGGGAT-GCC----GA---GGC------GG------GCAGACCAC-A-------T--------GAG-C-A----CAGAA---GTTT-A-AGAC-CAG-CC-T--GGGCAA-C-ATA-G-CGAG-A---C-CC-TGTCTCTA-------------------------------
>AluJo_628
--------------------------------------------------GGCCGG--GA---ACATTGGCTC-ATGCC----TG-T-AAT------CT----CAGC-A-G-TT-TGGGAG-GCC----AA---GGT------GG------GAGTATCGC-G-------G--------GAG-C-C----CAGAA---ATTC-G-AGAC-CAG-TC-T--GGGCAA-C-ACG-G-TGAG-T---C-CC-TGTCTCT--------------------------------
>AluJo_629
--------------------------------------------------GGCCCA--GC---ACGGTGGTTT-ATGCC----TG-G-AAT------CC----CAAC-A-C-TT-TGGGAG-ACC----CA---GGT------GG------GTGCATCGC-T-------T--------GAG-C-C----CAGGA---CTTC-A-AGAC-CAG-CC-T--G-GCAA-C-ATA-G-TGAG-A---C-CC-TGTCTCTA-------------------------------
>AluJo_630
--------------------------------------------------GGCCAG--GT---GTGGTGGCTC-GTTCC----TG-T-AAT------CC----CAGC-A-C-TT-TGGGAG--CC----AA---GAC------AG------GAGGATTGC-C-------T--------GAG-C-C----CAGGA---GTTT-G-AGAT-CAG-TC-C--GGGCAA-C-ACA-G-CAAG-A---C-CT-TGTTTCTA-------------------------------
>AluJo_631
--------------------------------------------------GGCCAG--GT---ACGGTGACTC-ATGC-----TG-T-AAT------CC----TAGC-A-C-TT-TGGCAG-GCC----AA---GGC------AG------GAGGACTGT-C-------T--------GAG-T-C----CAGGA---GTTC-A-AGAA-CAG-CC-T--GAGCAA-C-ACA-G-CAAG-A---T-GC-TGTCTCTA-------------------------------
>AluJo_632
--------------------------------------------------GGCTGG--GT---ATGGTGGCTC-ATGCC----TT-T-AAT------CC----TGGC-A-C-TT-TGCAAG-GCC----TA---GAT------GG------GAGGATAGC-C-------T--------GAG-C-C----CAGGA---GTTT-G-AGAG-CAG-CC-T--GGGGAA-C-ACA-G-CGAG-A---C-CC-TGTCTCT--------------------------------
>AluJo_633
--------------------------------------------------GGCCAG--GT---GTGGTGGCTC-TTGCG----TG-T-AAT------CC----CAGC-A-T-TT-TGGGAG-GCT----GA---GGC------AG------GAGGATTGC-T-------T--------GAT-C-C----CAGGA---GTTT-A-AGAC-CAG-CC-T--GGGCCA-C-ATA-G-GAAG-A---T-TC-TCTCTGT--------------------------------
>AluJo_634
--------------------------------------------------GGCCAG--GC---TTGGTGGCTC-ATGCC-------T-AGT-----------------G-C-TT-TGGGAG-GCC----GA---GGT------GG------GAGGATCAC-T-------T--------CAG-C-C----CAAGA---GTTG-G-AGGC-CAG-CC-T--AGGCAA-C-ATG-G-TGAG-A-----CACCATCTCTACAAAAAA------------------------
>AluJo_635
--------------------------------------------------GGCCAG--GC---ATGGTGGCTC-ATGCC----TG-T-GAT------CC----CAAC-A-C-TT-TGGGAC-ACT----GA---GGT------GG------GAGGACTGC-T-------T--------GAG-C-C----CAGGA---GTTC-A-AGAC-TAA-CC-T--GGGCAA-A-ATA-G-CAAG-A---T-GC-TGTCTCT--------------------------------
>AluJo_636
--------------------------------------------------GGCCGA--GT---GTGGTGGCTC-ATGCC----TA-T-AAT------CC----CAGC-A-T-TT-TGGGAG-GCT----GA---AGC------AG------GAGGATCAC-T-------T--------GAC-C-C----CAGGA---GTTC-A-AGAC-CAG-CC-T--GGGCAA-T-ATA-G-TAAG-A---T-CT-TCTCTCT--------------------------------
>AluJo_637
--------------------------------------------------GGCCAA--GC---ATGATGACTC-ACGCC----TG-T-AAT------CT----CAGC-A-C-TC-TGGGAG-GCC----AA---GGT------GG------GAGGATGGC-T-------T--------GAG-C-T----CAGGA---GTTC-A-AGAC-CAA-CC-T--GGGCAA-C-ACA-G-CAAA-A---C-CC-TGTCTCT--------------------------------
>AluJo_638
-----------------------------------------------------CAG--GC---ATGCTGGCTC-ATGCC----TG-T-AAT------CC----CAGC-A-C-TT-TGGGAG-GCC----GA---GGT------GG------GAAGATCAT-T-------T--------CAA-C-C----CAGGA---GTTC-A-AGAC-CTG-CC-A--GAGCAA-C-AGA-G-TGAG-A--CC-CC-TGTCTCTAC------------------------------
>AluJo_639
--------------------------------------------------GGCTGG--GC---ATGGTGGCTC-ATGCC----TG-T-AAT------CC----TAGC-A-C-TT-TGGGAG-GCT----GA---GAT------GG------GAGGTTTGC-T-------T--------AAG-C-T----CAGGA---GTTC-A-AGAC-CAG-CC-T--GGGCAG-T-ATG-G-TGAG-A---C-CC-TACCTCT--------------------------------
>AluJo_640
--------------------------------------------------GGCCAG--GC---ATGATGGCTC-ATGCC----TG-T-AAT------CC----CAAC-A-C-AC-TGGGAG-GCC----AA---GGT------GG------GAGGATCAC-A-------T--------GAC-T-C----CAGGA---GTTT-A-AGAC-CAG-CC-T--TGGCGA-C-ATA-G-CAAG-A--CC-CC-CATCTC---------------------------------
>AluJo_641
--------------------------------------------------GGCTAG--GT---ATGGTGACTC-ATGCC----TG-T-AAT------CG----CAGC-A-C-TT-TGGGTG-GCC----AA---GGT------GA------GAGGATCAC-T-------T--------GAG-C-C----TAGGA---GTTC-A-AGAC-CAG-CC-T--G-GCAA-C-CTA-G-TGAG-A---C-CC-TGTTTCTA-------------------------------
>AluJo_642
---------------------------------------------------GCCAG--GC---ACTGTGGCTC-ATGCC----TA-T-AAT------CC----CAAC-A-C-TT-CAGGAG-GCC----AA---GGT------GG------GAGGATTGC-T-------T--------CAG-C-C----CAGGA---ATTC-A-AGAC-TAG-CC-T--GGGCAA-C-ATA-G-TGAG-A---C-TC-CATCTATA-------------------------------
>AluJo_643
-----------------------------------------------------------------------TC-ATGCC----TG-T-AAT------CC----CAAC-A-C-TT-TGGGAG-GCC----AA---GGT------GG------GCAGATCCC-T-------T--------GAG-T-T----CATGA---GTTT-G-AGAC-CAG-CC-T--GGAAAA-C-ATG-G-CAAG-A---C-CC-CGTCTCTACAAAAAATACAAAAA----------------
>AluJo_644
--------------------------------------------------GGCCAA--GT---GTGGTGGCTC-ATGCC----TA-T-AAT------CT----CAGC-A-C-TT-TGGGAG-GCA----AA---GGT------GG------GAGGATCAC-T-------A--------GAG-C-C----CAGGA---GTTC-A-AAAC-GAG-CA-T--GGGCAA-C-ACA-G-GGAC-A---C-CT-CATCTCT--------------------------------
>AluJo_645
--------------------------------------------------GGCCAG--GC---ATGGTGGCTC-ACGCC----TG-T-AAT------CC-------C-A-T-TT-GGGGGG-GCC----AA---GGT------GG------GAGGATCAC-T-------T--------GAG-C-C----CAGGA---GTTC-A-AGAC-CAG-CC-A--AGGCAG-C-ACA-G-TGAG-A---C-CC-CGTCTCTACA-----------------------------
>AluJo_646
----------------------------------------------------------------------------GCC----TG-T-AAT------CC----CAGC-A-C-TT-TGGGAG-GCC----AA---GGG------GG------GTGAATCAT-T-------T--------GAG-C-C----CAGGA---GTTC-A-AGTC-TAG-CC-T--GAGCAA-A-ATA-G-TGAG-ACCCC-CC-CATCTCTATAAAATATATACATAT---------------
>AluJo_647
--------------------------------------------------GGCCAG--GT---GTGGTGGCTT--CGCC----TG-T-AAT------CC----CAGC-A-C-TT-TGGGAG-ACA----AA---AGT------GG------GCAGATTGC-T-------T--------GAG-C-C----CGGGA---ATTT-G-AGAC-CAG-CC-A--GGGCAA-C-ATG-G-CGAA-A---C-CC-TGTCTCTA-------------------------------
>AluJo_648
---------------------------------------------------GCCAG--GT---GCGGTGGCCC-ACGCT----TG-T-AAT------CC----CAGC-A-C-TT-TGGGAA-GCC----GA---GGT------GG------GAGGATCGC-T-------T--------GAG-C-C----TTGGA---GTTC-A-AGAC-CAG-CC-T--GGGCAA-C-AGA-G-CAAT-A---C-CC-TGTCTCTA-------------------------------
>AluJo_649
---------------------------------------------------GCCAG--GC---GTGGTGGCTC-ACACC----TG-T-AAT------CC----TAAC-A-C-TT-TGGGAG-GCC----AA---GCT------GG------GAGGATCAT-T-------T--------GAG-C-C----CAAGA---GTTC-A-AGAC-CAG-CC-T--GAGCAA-T-AAA-G-TGAG-A---C-CC-CATCTCTA-------------------------------
>AluJo_650
--------------------------------------------------GGCCGA--GC---ACAGTGGCTC-ATGTC----TG-T-AAT------CC----TAGC-A-C-TT-TGGGAG-GCC----AA---GGC------AG------GAGAACTGC-T-------T--------GAG-T-C----CAGGA---GTTC-A-AGAC-CAG-CC-T--GGGCAA-C-ACA-G-TGAG-A---C-AT-TGTCTCT--------------------------------
>AluJo_651
---------------------------------------------------GCTGG--GT---ATGATGGCTC-ATGCC----TG-T-AAT------CC----CAGC-A-C-TT-TGGGAG-ACC----AA---GAT------AG------GAGGATTGC-C-------T--------GAG-T-C----CAGGA---GTTC-G-AGAC-CAG-CC-T--GGGCAA-C-ACA-G-CAAT-A---C-CC-TGTCTCTA-------------------------------
>AluJo_652
----------------------------------------------------------GC---ATGGTGACTC-ATGCC----TA-T-AAT------CC----CAGC-A-C-TT-TGGGAG-GCC----AA---GTT------GG------AAGGACCAC-T-------T--------GAG-C-C----CAGGA---GTTC-A-AGAC-CAA-TC-T--GGGCAA-C-ATG-G-CAAA-A---C-CC-TGTCTTTACAAAA--------------------------
>AluJo_653
--------------------------------------------------GGCCAG--GC---AAGGTGGCTC-ATGCC----TA-T-AAT------CC----CAGC-A-C-TT-TGGGAG-GCC----AA---GGC------AG------GAAGACTGC-T-------T--------GAG-C-C----CAGGA---GTTC-A-AGAC-TAG-CC-T--GAATAA-C-ACA-GCCAAG-A---C-CC-TGTCTC---------------------------------
>AluJo_654
--------------------------------------------------GGCCGG--GC---ACAGTGGCTC-ATGCC----TG-T-AAT------CC----TAAC-A-C-TT-TGGGAG-ACC----AA---AGT------GG------GAGGATCGC-T-------T--------GAG-T-C----TGGAA---GTTC-A-AAAC-CAG-CC-T--GAGCAA-C-ATA-G-CAAG-A---C-CC-TCTCTCT--------------------------------
>AluJo_655
--------------------------------------------------GGCCAA--GC---GAGGTGGCTC-ATGCC----TA-T-AGT------CC----CAAC-A-C-TT-TGGGAG-GCC----AA---GGT------GG------GAGGATCAC-T-------T--------GAG-C-C----CAGGA---GTTC-A-AGAC-CAG-CC-T--TGGCAA-C-ATA-G-TGAG-A---C-CC-CATCTCT--------------------------------
>AluJo_656
--------------------------------------------------GGCCAG--GC---GTGGTGGCTC-ATGCC----TG-T-AAT------CC----CAAC-A-C-TT-TGGGAG-ACC----AA---TGT------GG------GAGGATCAC-T-------T--------GAG-C-C----CAGGA---GTTC-A-AGAC-CAG-CC-T--GGGCAA-C-ATA-G-AGAG-A---A-TC-TGTCTCT--------------------------------
>AluJo_657
--------------------------------------------------GACCCA--GT---GTGGTGGCTC-ATGCC----TA-T-AAT------CC----CAGC-A-C-TT-TGGGAG-GCC----AA---GGT------GG------GAGGATCGC-T-------T--------GAG-C-C----CAGGA---GTTC-A-AGAC-GAG-CC-T--GGGCAA-C-ATA-G-CAAG-A---C-CC-TGTCTCT--------------------------------
>AluJo_658
--------------------------------------------------GGCCAG--GT----TGGTGGCTC-ATGCC----TA-T-AAT------CC----CAGC-A-C-TT-TGGGAG-ACC----AA---GGT------GG------GCAGATCGC-T-------T--------GAG-C-C----CAGGA---GTTC-A-AGAC-CAG-CC-T--GGGCAA-C-ATA-G-CAAG-A---C-CC-TGTCTCTA-------------------------------
>AluJo_659
--------------------------------------------------GGCCGG--GC---ATGGTGGCTC-ATGCC----TG-T-AAT------CC----TAGC-A-C-TT-TGGGAG-GCC----AA---AGT------GG---------------------------------GAG-T-C----CAGAA---GTTC---AGAC-TAG-CC-T--GGGCAA-C-ATA-G------A----CCC-TGTCTCTACATACATACACACAT----------------
>AluJo_660
--------------------------------------------------GGCCAG--GC---ATGGTGGCTC-ATACC----TG-T-AAT------CC----TAGC-A-C-TT-TGGGAG-GCG----GA---AGT------GG------GAGGATCGC-T-------T--------GAG-T-C----CAGGA---TCTC-A-AGAC-CAA-CC-T--GGGCAA-C-ATG-G-TGAG-A-----CCCTGTCTCT--------------------------------
>AluJo_661
---------------------------------------------------GCCAG--AT---GCGGTGGCTT-ACACT----TG-T-AAT------CC----CAGT-A-C-TT-TTGGAG-GTG----GA---GGT------GG------GACGATTGC-T-------T--------GAC-T-T----CAGGA---GTTC-A-AGAC-AAA-CC-T--GGACAA-T-ATA-G-CAAG-A---C-CC-CATCTCTA-------------------------------
>AluJo_662
--------------------------------------------------GGCCAG--GA---GTGATGACCC-ACACC----TA-T-AAT------CC----CAGT-G-T-TT-TGGGAG-GCC----AA---GGA------GG------AAGAATTGT-T-------T-----------------------------------GAC-TAG-CC-T--GGGCAA-C-ATA-G-CAAG-A---C-CC-CATCTCTACAAAAAAAACAAAAA----------------
>AluJo_663
--------------------------------------------------GGCTGG--GC---ATGGTGGTTT-ATGCC----TA-T-AAT------CC----CAGC-A-T-TT-TGGGAG-GCC----CA---GGT------GG------AATGATCAT-T-------T--------GAG-C-C----TAGTA---GTTC-A-AAAA-TGG-CC-T--GGGCAA-T-ATA-G-TGAG-A---A-CT-TGTCTCT--------------------------------
>AluJo_664
-------------------------------------------------GGCCTGG--GT---ATAGTGGCTC-ATGCC----TG-T-AAT------CC----CAAC-A-C-TG-TGGGAG-GCC----AA---GAC------AG------GAGGATTGC-T-------T--------GAG-C-C----TAGGC---CTTC-A-AGAG-CAG-CC-T--GGGTAA-C-ACA-G-CAGG-A---C-CT-CACCTC---------------------------------
>AluJo_665
--------------------------------------------------GGCTAG--GA---ACCATGGCTC-ATGCT----TA-T-AAT------GC----CAGG-A-G-TT-TGAGAG-GTT----GA---GGC------AG------AAGGATTGC-T-------T--------GAG-C-C----CAGGA---GTTT-G-AAAC-CAG-GC-T--GGGCAA-C-ACA-A-TGAG-A---C-CC-CATCTCT--------------------------------
>AluJo_666
---------------------------------------------------GCTGG--GG---GCATTGGCTC-ACACC----TG-T-AAT------CC----CAAC-A-C-TT-TGGGAA-ACT----GA---GGT------GA------GAGGATCAC-T-------T--------GAG-C-C----AGGAA---GTTC-A-AGAC-CAG-CG-T--GGGCAA-C-ATA-G-CAAG-A---C-CT-CATCTCTA-------------------------------
>AluJo_667
--------------------------------------------------GACTGG--AT---GCGGTGGCGC-ACACC----TG-T-AAT------CC----CAAC-A-C-TT-TGGGAA-GCC----GA---GGC------AG------GAGGATTAC---------T--------GAG-C-C----CAGGA---GTTC-A-AGAC-CAG-AC-T--GGGCGA-C-AGA-G-CAAG-A---C-CT-GATCTCTA-------------------------------
>AluJo_668
---------------------------------------------------GCTGG--GT---GCTGTGGCTC-ACGCC----TG-T-AAT------CC----CAGT-A-C-TT-TGAGAG-GCC----AA---GAC------AG------GAGGATCGC-T-------T--------GAG-C-C----GGGGA---ATTC-A-AGAC-CAA-CC-T--GGGCAA-C-ACG-G-CAAG-A---C-TT-TGTCTCTA-------------------------------
>AluJo_669
---------------------------------------------------GCTGG--GT---ACAGTGGCTC-ACACC----TG-T-AAT------CC----CAAT-A-C-TT-TGGGAA-TCC----AA---GAC------AG------GAGGATCAC-T-------T--------GAG-C-C----CAGGA---ATTC-A-AGAC-CAG-CC-T--GGGCAA-C-ATA-G-CAAG-A---C-AT-CATCTCTA-------------------------------
>AluJo_670
---------------------------------------------------GCCAG--GT---GTCGTGGTTC-ACGCC----TG-T-AAT------CC----TAGC-A-C-TT-TAGGAG-GCC----CA---GGC------AG------GAGAATCAC-T-------T--------GGG-C-T----CAGGA---ATTT-G-AAAC-CAG-CC-T--GGACGA-C-ATA-G-TGAG-A---T-CT-TGTCTCTA-------------------------------
>AluJo_671
--------------------------------------------------GGTCAG--GC---ACCATGGCTC-ATGAG----TG-T-AAT------TC----AAGC-A-C-TT-TGGGAG-GCT----GA---GGC------CA------GTGGATCAT-T-------T--------GAG-C-T----CAGGA---GTTC-G-AGAC-CAG-CC-T--GGGCAT-C-ATA-G-CGAG-A---C-CA-TGTCTCT--------------------------------
>AluJo_672
--------------------------------------------------GACTGG--GT---ACAGTGGTCC-ACACC----TG-T-AAT------CC----TAGC-A-C-TT-TGAGAG-GCC----AA---GAC------AG------GAGGATCAC-T-------T--------GAG-C-T----TAGGA---GCTC-A-AGAC-CAG-CC-T--GAGAAA-C-ATA-G-TGAG-A---T-CT-CATCTTT--------------------------------
>AluJo_673
---------------------------------------------------GCCAG--TC---ACGGTGGCCC-ATGCC----TG-C-AGT------CC----CAGC-A-C-TT-TGGGAG-GCT----GA---GGC------GG------AAGGATCAC-T-------T--------GAG-C-C----TGGCA---GTTC-A-AGAC-CAG-CC-T--AGACAA-C-ATG-G-CAAG-A---C-CC-TGTCTCTA-------------------------------
>AluJo_674
---------------------------------------------------GCCCA--GG---GCAATGGCTC-ACACC----TG-T-AAT------CC----CTGC-A-C-TT-TGAGAG-GCT----GA---GAC------AG------GAGAATCAC-T-------T--------GAG-C-T----CAGGG---GTTC-A-ATAC-CAC-CC-T--GGGCAA-C-ATA-C-AGAG-A---C-CT-TGTCTCTA-------------------------------
>AluJo_675
--------------------------------------------------GGCCAG--GT---GTGGTGGCCC-ACGCC----TG-T-AAT------GC----CAGC-G-C-TT-TGGGAG-GCC----AA---GGT------AG------GAGAACTGC-T-------T--------GAG-C-T----CAGGA---GTTC-C-AGAC-CAG-CC-T--GGGCAA-CAATA-T-CAAG-A-----CCTCATCTC---------------------------------
>AluJo_676
--------------------------------------------------GGCCAG--GT---GTGGTGGCTC-ATGCC----TG-T-AAT------TC----CACC-A-C-TT-TGGGAG-GCC----AA---GGT------AG------GAGGATCTC-T-------T--------GAG-C-C----CAGGA---GCTC-A-AGAC-CAG-CC-T--GGGCAA-C-AAA-A-CAAG-A-----CCTCATTTTT--------------------------------
>AluJo_677
--------------------------------------------------GACCGA--GC---ATGGTGGCTC-ACGCC----TG-T-AAG------TC----GAGC-A-C-TT-TGGGAG-GCT----GA---GCT------GG------GAAAATCAC-T-------C--------GAG-C-T----CAGGA---GTTC-A-AGAC-CAG-CC-T--AGGCAA-C-ATA-G-TGAG-A---C-CT-TGTTTCT--------------------------------
>AluJo_678
--------------------------------------------------GGCTGG--GC---ATGGTGGCTT-ACGCC----TA-T-GAT------AT----TAGC-A-C-TT-TGGGAG-GCC----AA---GGT------GG------GAAGATCGC-T-------T--------GAG-C-T----CAGAA---GTTT-G-AGAC-CAC-TC-T--GGGCAA-C-AGA-G-TGAG-A---C-CC-CATCTCT--------------------------------
>AluJo_679
--------------------------------------------------GGCTGG--GC---ATGGTGGCTC-ACACC----CG-T-AAT------CC----CAAA-A-C-TT-TGGGAG-GCC----AA---GAT------CG------AAGGATC-C-T-------T--------AAA-C-C----CAGGA---GTTT-G-AGAC-CAG-CC-T--GGGCAA-C-ATA-G-TGAG-A---T-CG-TTTCTCTA-------------------------------
>AluJo_680
---------------------------------------------------GCCAG--GT---GTGGTAACTC-ACACC----TA-T-AAT------CT----GAGC-A-C-TT-TGGGAG-GCT----GA---GGC------AG------AAGAATCAC-T-------T--------AAG-T-C----CAGGA---GTTC-A-AGAC-TAA-CC-T--GGGCAA-C-ATA-G-CAAG-A---C-CC-CATCTCTA-------------------------------
>AluJo_681
--------------------------------------------------GGCCAG--CT---GTGGTGGCTC-ACACC----TG-T-AAT------CT----CAGC-A-C-TT-TAAGAG-GCC----AA---GGC------AG------GAGGATTGC-A-------T--------GAG-C------CAGGA---GTTC-A-AGAT-CAG-CC-C--TGGCAA-C-ATA-G-CAAG-A---C-CC-CATCTCTA-------------------------------
>AluJo_682
---------------------------------------------------GCCAG--GC---ACAGTGGCTC-ACACC----CA-T-AAT------CC----CAGC-A-C-TT-TGGGAG-GCC----AA---GGC------AA------GAGGATCGG-T-------T--------GAG-C-T----CAGGA---GTTC-A-AGAC-CAG-CC-T--GGGCAA-C-ATA-G-CAAG-A---C-CC-CATCTGTA-------------------------------
>AluJo_683
----------------------------------------------------CCAG--GC---ATGGTGGCTC-ACACC----TC-TAAAT------CT----CAGC-A-C-TT-TGGGAG-GCC----AA---GGC------AG------GAGTATCTC-T-------T--------GAG-C-C----CATGA---GTTC-A-AGAC-CAG-CC-T--GGGCAA-C-ACA-G-CAAG-A---C-CC-CATCTCTA-------------------------------
>AluJo_684
--------------------------------------------------GGCAGG--GC---ATGGTGGCTC-ACACC----TG-T-AAT------CC----TATT-A-C-TT-TGGGAG-GCT----GA---AGT------GG------GAGGATCTC-T-------T--------GGG-T-A----CAGGA---GTTC-G-AGAC-CAG-CC-T--GGGCAA-C-ATA-G-TGAG-A---T-GT-TATCTCT--------------------------------
>AluJo_685
--------------------------------------------------GGCTGG--GC---ATAGTGGCTC-ATGCC----TG-T-AAT------CC----TACC-A-C-TT-TGGGAG-GCT----GA---GAC------GG------GAGGATCAC-T-------T--------GAG-C-T----CAGAG---GTTT-G-AAAC-CAG-CT-T--GGGTAA-C-ATA-G-TGAG-A---T-CT-TGTCTCT--------------------------------
>AluJo_686
--------------------------------------------------GGCCAG--GC---ATGGTGGCTC-ACGCC----TG-T-AAT------CC----TAGC-A-C-TT-TGGGAG-GCT----GA---GGA------GA------GAGGATCAC-T-------T--------GAG-T-T----TAGGA---GTTT-G-AAAC-CAG-AC-T--GGGCAA-C-ATG-G-TGAG-A---C-CT-CATCTCT--------------------------------
>AluJo_687
---------------------------------------------------GCCAG--GC---ACGGTAGCTC-ATGCC----TG-T-AAT------CC----TAAC-A-C-TT-TGGGAG-GCC----TA---GGA------GG------GAGGATCGC-T-------T--------GAG-C-T----CAGGA---GTTT-G-AAAC-CAG-CC-T--GGGCAA-C-ACA-G-TGAG-A---C-CT-CATCTCTA-------------------------------
>AluJo_688
----------------------------------------------------CTGA--GT---GTGGTCGCTC-ACAAC----TG-T-AAT------CC----CAGC-A-C-TT-TGGGAG-GCT----GA---GGC------AG-------AGGATCGC-T-------T--------GAG-C-T----TAGGA---GTTT-G-AGAC-CAC-CC-T--GGGCAG-C-ATA-G-TGAG-A---C-TT-CATTTTTACA-----------------------------
>AluJo_689
--------------------------------------------------GGCAGA--GT---GTGGTGTCTC-ACGCC----TG-T-AAT------CC----TAGC-A-C-TT-TGGGAG-CCC----AA---GGC------TG------GAGGATCGC-T-------T--------GAG-C-T----TAGGA---GTTT-G-AGAC-CAG-CC-T--AGGCAA-C-ATG---TGAG-A-----CCTCATTTCTA-------------------------------
>AluJo_690
----------------------------------------------------CCAG--GC---ACCATGGCTC-ATGCC----TA-T-AAT------CC----CAGC-A-C-TT-TGGGAG-GCT----GA---GCC------AC------ATGGATCAC-T-------T--------GAG-C-C----CAGGA---GTTC-A-AGAC-CAG-CC-T--GGACAA-C-ATA-A-TGAG-A---C-CC-CATCTCTAC------------------------------
>AluJo_691
---------------------------------------------------GCCAG--GT---CAGGTGGCTC-ACACC----TG-T-AAT------CC----TAGC-A-C-TT-TGGGTG-GCC----AA---GGT------GG------GCAGATCAC-T-------T--------GAG-C-T----CAGGA---GTTC-A-AGAC-CAG-CT-T--GGGCAA-T-ATA-G-TAAG-A---C-CT-CCTCTCTA-------------------------------
>AluJo_692
--------------------------------------------------GACCAG--GT---GTGGTG-CTC-ACACA----TA-T-AAT------CC----TAAC-A-C-TT-TGGGAG-GCC----AA---GGG------CA------GAGGATCAC-T-------T--------GAG-C-A----CAGGA---GTTT-C-AGAC-CAG-CC-T--GGGCAA-C-ATA-G-TGAG-A---C-CA-CGTCTCTA-------------------------------
>AluJo_693
--------------------------------------------------GGCTGG--GC---ACAGTGGCTC-ACACT----TG-T-AAT------CT----CAGC-A-C-TT-TGGGAG-GCC----AA---GGT------GG------GAGGATAGC-T-------T--------GAG-C-T----CAGGA---GTTC-T-AGAC-CAG-CC-T--AGGCAA-C-ATA-C-TGAG-A---C-CT-CATCTCT--------------------------------
>AluJo_694
--------------------------------------------------GGCCAG--GG---GCAGTGGCTA-ACACT----TG-T-AAT------CT----TAGC-A-C-TT-TGGGAG-ACC----AA---GGT------GG------GAGGATCGC-T-------T--------GAG-C-C----CAGGA---GTTC-T-AGAG-CAG-CC-T--GGGCAA-C-ACA-G-TGAG-A-----CT-CATCTCTA-------------------------------
>AluJo_695
--------------------------------------------------GGACAA--GC---ACAGTGGCTC-ACACC----TG-T-AAT------CC----TAGC-A-C--T-TGGGAG-GCT----GA---GGC------AG------GAGGATCAC-T-------T--------GAG-C-T----CAGGA---GTTC-C-AGAC-CAG-CC-T--GGGCAA-C-ATA-G-TAAG-A---C-CT-CTTCTTTA-------------------------------
>AluJo_696
--------------------------------------------------GGCCGG--GC---ATGATGGCTC-ACACC----TG-T-AAT------CC----TAGC-A-C-TT-TGGGAG-GTA----GG---GGA------GG------GAGGATCAC-T-------T--------GAG-C-T----CAGGA---GTTC-G-AGAC-CAG-CC-C--AGGCAA-C-ACA-G-TGAG-A---C-CC-CATCTCT--------------------------------
>AluJo_697
--------------------------------------------------GGCTGG--GC---ATGGTGGCTT-ACACC----TG-T-AAT------CC----CAGG-A-C-TT-TCGGAG-GCT----GA---GGT------GG------GAGGATTAT-T-------T--------GAG-C-T----CAGGA---GTTC-A-AGAC-CAG-CC-T--GGGCAA-T-CTA-G-TGAG-A---C-CC-CATCTCT--------------------------------
>AluJo_698
--------------------------------------------------GGCTGG--GC---ATGGTGGCTC-ACGCC----TG-T-AAT------CC----TAGC-A-C-TT-TGGGAG-GCT----GA---GGC------------CAAAGGATCAC-T-------T--------GTG-C-T----CAGGA---GTCC-G-AGAC-CAG-CC-T--GGGCAA-C-ATA-G-TGAG-A---C-CT-TGCCTCT--------------------------------
>AluJo_699
----------------------------------------------------------------------------------------AAT------CC----CAGC-A-C-TT-TGGGAG-GCT----GA---GGC------AGTGATCAAAGGATCAC-T-------T--------CAG-C-T----CAGGC---GTTC-A-AGAC-CAG-CC-T---GACAA-C-ATA-G-TGAG-A---C-CT-TGCCCCTACAAAAAATTAAAGAAAATTA-----------
>AluJo_700
--------------------------------------------------GGTCGG--GT---TTGGTGGCCC-ACGCC----TG-T-AAT------CC----TAGC-A-C-TT-TGGGAG-GCT----GA---GGC------AG-------GAGGTCAC-T-------T--------AAG-C-T----CAGGA---GCTC-A-AAAC-CAG-CC-T--GGACAA-C-ATA-G-TGAA-A---C-CT-TGTCTCTA-------------------------------
>AluJo_701
--------------------------------------------------GGCCAG--GC---GTGGAGACTC-ACACC----TG-T-AAT------CC----CAGC-A-C-TT-TGAGAG-GCT----GA---GGC------AA------GAGGATCAC-T-------T--------GAG-C-T----CAGGA---GTTC-A-AGAC-CAG-TG-T--AGGTAA-C-ACA-G-TGAG-A---C-CT-CATCTCT--------------------------------
>AluJo_702
--------------------------------------------------GGCTGA--GT---GTGGTGGCTC-ACACT----GG-T-GAA------CC---------A-C-TT-TGGGAG-GCC----AA---GGT------GG------GAGGATAGC-T-------T--------GAG-C-T----CAGGA---GTTC-A-AGGT-CAG-CC-T--GGGCAA-C-ATA-G-TGAC-A-----CCTCGTCTCTATTA----------------------------
>AluJo_703
--------------------------------------------------GGCTGG--TC---ATGGTGGCTC-ACATC----TG-T-AAT------AC----TAGC-A-C-TT-TGAGAG-GCT----AA---GAT------GG------GAGGATCAC-T-------T--------GAG---T----CAGGA---GTTC-G-AGAC-CAG-CC-T--GGGCAA-C-ATA-G-TGAG-A---T-CC-TGTCTCTA-------------------------------
>AluJo_704
---------------------------------------------------GTTGG--GC---ATGGTGGCTC-AAACC----TA-T-AAT------CT----CAGC-A-C-TT-TGGGAA-GCT----GA---GGC------TG------GAGGATCGC-T-------T--------GAG-C-T----CATGA---GTTC-A-AGAC-CAG-CC-T--GGGCAA-C-ATA-G-TGAG-A---C-CC-TGTCTCTA-------------------------------
>AluJo_705
------------------------------------------------------GG--GC---ATGGTGGCTC-TTGCC----TG-T-AAT------CC----TAGC-A-T-TT-TGGGGG-GCT----AA---GGT------GG------GAGGATCAC-T-------T--------GAG-C-T----CAGGA--------G----------CC-T--GGGCAA-C-ATA-G-TGAG-A-----CCTTGTCACTATAAAATAACAACAA-----------------
>AluJo_706
------------------------------------------------------GG--GC---ATGGTGGCTC-TTGCC----TG-T-AAT------CC----TAGC-A-T-TT-TGGGGG-GCT----AA---GGT------GG------GAGGATCAC-T-------T--------GAG-C-T----CAGGA--------G----------CC-T--GGGCAA-C-ATA-G-TGAG-A-----CCTTGTCACTATAAAATAACAACAA-----------------
>AluJo_707
------------------------------------------------------GG--GC---ATGGTGGCTC-TTGCC----TG-T-AAT------CC----TAGC-A-T-TT-TGGGGG-GCT----AA---GGT------GG------GAGGATCAC-T-------T--------GAG-C-T----CAGGA--------G----------CC-T--GGGCAA-C-ATA-G-TGAG-A-----CCTTGTCACTATAAAATAACAACAA-----------------
>AluJo_708
------------------------------------------------------GG--GC---ATGGTGGCTC-TTGCC----TG-T-AAT------CC----TAGC-A-T-TT-TGGGGG-GCT----AA---GGT------GG------GAGGATCAC-T-------T--------GAG-C-T----CAGGA--------G----------CC-T--GGGCAA-C-ATA-G-TGAG-A-----CCTTGTCACTATAAAATAACAACAA-----------------
>AluJo_709
------------------------------------------------------GG--GC---ATGGTGGCTC-TTGCC----TG-T-AAT------CC----TAGC-A-T-TT-TGGGGG-GCT----AA---GGT------GG------GAGGATCAC-T-------T--------GAG-C-T----CAGGA--------G----------CC-T--GGGCAA-C-ATA-G-TGAG-A-----CCTTGTCACTATAAAATAACAACAA-----------------
>AluJo_710
------------------------------------------------------GG--GC---ATGGTGGCTC-TTGCC----TG-T-AAT------CC----TAGC-A-T-TT-TGGGGG-GCT----AA---GGT------GG------GAGGATCAC-T-------T--------GAG-C-T----CAGGA--------G----------CC-T--GGGCAA-C-ATA-G-TGAG-A-----CCTTGTCACTATAAAATAACAACAA-----------------
>AluJo_711
--------------------------------------------------GGCCGG--GA---ATGGTGGCTC-ACACC----TG-T-AAT------CC----TAGC-A-T-TT-TGGGAG-GTG----GA---GGT------GG------GAGGAT-AC-C-------T--------GAA-C-T----CAGGA---GTTC-A-AGAC-CAG-CC-T--AGGCAA-C-ATA-G-TGAG-A---C-CT-TGTCTCTA-------------------------------
>AluJo_712
--------------------------------------------------GGCTGG--GC---ATGGTGGCTT-ACACC----TA-T-AAT------CC----CAAC-A-C--T-TGGGAG-GCC----GA---GGT------GG------GAGGATTGC-T-------T--------GAG-C-T----CAGGA---GTTC-A-AAAC-CAG-CC-T--GGACAA-C-ATA-G-TGAG-A---C-CT-TCTCTCTA-------------------------------
>AluJo_713
--------------------------------------------------GGCTGG--GC---ATGGTGGCTT-ACACC----TA-T-AAT------CC----CAAC-A-C--T-TGGGAG-GCC----GA---GGT------GG------GAGGATTGC-T-------T--------GAG-C-T----CAGGA---GTTC-A-AAAC-CAG-CC-T--GGACAA-C-ATA-G-TGAG-A---C-CT-TCTCTCTA-------------------------------
>AluJo_714
--------------------------------------------------GGCTGG--GC---ATGGTGGCTT-ACACC----TA-T-AAT------CC----CAAC-A-C--T-TGGGAG-GCC----GA---GGT------GG------GAGGATTGC-T-------T--------GAG-C-T----CAGGA---GTTC-A-AAAC-CAG-CC-T--GGACAA-C-ATA-G-TGAG-A---C-CT-TCTCTCTA-------------------------------
>AluJo_715
----------------------------------------------------CTGA--GT---GTGGTGACTC-ATGCC----TA-A-AAT------CC----TAGC-A-C-TT-TGGGAG-GCC----AA---GGT------GG------GAGGGTCAC-T-------T-------GGAG-C-T----CAGGA---GTTC-C-AGAC-CAG-CC-T--GGGCAA-C-ATA-G-TGAG-A---C-CT-CATCTCTA-------------------------------
>AluJo_716
-----------------------------------------------------------------------------------TG-T-AAT------CC----TAGC-A-C-TT-TGAGAG-GCC----GA---GGT------GA------GAGGATCAC-C-------T--------GAG-C-T----CAGGA---GTTC-A-AGAC-CAG-CC-T--GGGCAA-C-ACC-G-TGAG-A---C-CT-CGTCTCTATTTAAAATAATAACAGGAATTA---------
>AluJo_717
---------------------------------------------------GCTGG--GC---ATGGTGGCTC-ACACC----TA-T-AAT------CC----TACC-A-C-TT-TGGGAA-GCC----AA---GGT------GG------GAGGATCAC-T-------T--------GAG-C-T----CAGGA---GTTC-A-AGAC-CAG-CC-T--GGGCAA-C-ATTAG-TGAG-A---C-CT-CGTCTCT--------------------------------
>AluJo_718
--------------------------------------------------GGCCGG--GC---GCCATGGCTT-ATGCC----TG-T-AAT------CC----TAGT-A-C-TT-TTTGAG-GCT----GG---AGC------AG------GTGGATTGC-T-------T--------GAG-C-T----CAGGA---GCCT-G-AAAC-CAG-CC-T--GGGCAA-C-ATT-G-TGAG-A---C-TG-CATCTCT--------------------------------
>AluJo_719
---------------------------------------------------GCCCA--GC---GTGGTAGCTC-AAGCC----TG-T-AAT------CC----CAGC-A-C-TT-TGGAAG-GTC----AA---GGC------AA------GAGAATCAC-C-------A--------GAG-C-T----CGGG-----------AGAC-CAG-CC-T--TAGCAG-C-AAA-G-CAAG-A---C-CT-CATCTCTACAAAAA-------------------------
>AluJo_720
--------------------------------------------------GGCCAG--GC---ACAGCGGCTC-ATCTC----TG-T-AAT------CA----CAGC-A-C-TT-TGGAAG-GCC----AA---GGC------AG------GTGGGTTCC-T-------T--------GAG-C-C----CAGGA---GTTC-C-AGAC-CAG-CC-C--GGGAAA-T-ATG-G-GGAG-A---C-CC-TGTCTCT--------------------------------
>AluJo_721
--------------------------------------------------GGCCGG--AG---GTGGTACCCC-ATACC----TG-T-AAT------CC----CAGC-A-C-TG-TGGAAG-GTC----AA---GGC------AC------GAAGATTGC-T-------T--------GAG-C-C----CAGGA---GTTC-A-AGGC-CAG-GC-T--GGGCAA-C-TTG-G-TGAG-A---T-CG-TGTCTCT--------------------------------
>AluJo_722
--------------------------------------------------GGCCGG--AG---GCGGTACCCC-ATACC----TG-T-AAT------CC----CAGC-A-C-TG-TGGAAG-GTC----AA---GGC------AC------GAAGATTGC-T-------T--------GAG-C-C----CAGGA---GTTC-A-AGGC-CAG-GC-T--GGGCAA-C-TTG-G-TGAG-A---T-CG-TGTCTCT--------------------------------
>AluJo_723
--------------------------------------------------GGTCAG--G----GCAGTGGTTC-ACACT----TG-T-AAC------CT----CAGC-A-C-TC-TGGGAG-GCA----GA---GGT-------G------GAGGATCACTT-------G--------GAG-C-C----CAGCA---GTTC-A-AGTC-CAG-CC-T--GGGCAA-T-GTC-G-CGAG-A---C-TC-TGTCCCCA-------------------------------
>AluJo_724
---------------------------------------------------GCCAT--GT---ACAGTGGCTC-ACATC----TA-C-AAT------CC----CAGC-A-C-TT-TGGGGA-GCC----AA---GAC------AG------GGGGATCAC-C-------T--------GAG-C-C----CAGGA---GTTC-A-AGAC-CAG-CC-T--GGGCAA-T-TTA-G-CAAG-A---A-AC-TGTCTCTA-------------------------------
>AluJo_725
--------------------------------------------------GGCCAG--GC---ATGGTGGTTC-ATGTC----TA-T-AAT------CC----CCAC-A-T-TT-TGGGAG-GCT----GA---GGC------AG------GAGGATTGC-T-------T--------GAG-C-C----CAGGA---GTTT-G-GGAA-CAG-CC-T--GAGCAA-C-ATT-A-GGAG-A---C-CC-CACCTCT--------------------------------
>AluJo_726
--------------------------------------------------GACTGA--GC---CCAGTGGCTC-CCACC----TG-G-CAT------CC----CAGC-A-C-TT-TGGAAG-GTT----GA---GGC------AG------GAGGATCAG-T-------T--------GAG-C-C----CAGGA---GTTT-G-GGAC-CAG-CC-T--GGGCAA-C-ACA-G-TGAG-A---C-CC-TGTTTCT--------------------------------
>AluJo_727
--------------------------------------------------GACTGA--GC---CCAGTGGCTC-CCACC----TG-G-CAT------CC----CAGC-A-C-TT-TGGAAG-GTT----GA---GGC------AG------GAGGATCAG-T-------T--------GAG-C-C----CAGGA---GTTT-G-GGAC-CAG-CC-T--GGGCAA-C-ACA-G-TGAG-A---C-CC-TGTTTCT--------------------------------
>AluJo_728
--------------------------------------------------GGCTGG--AT---ACAGTGGTTC-ACACC----TG-T-AAT------CC----AAGA-A-C-TA-TGGGAG-GCC----AA---GCC------AA------GAGGATTGC-T-------T--------GAA---T----TAGGA---GCTC-T-AGAC-TAG-CC-T--GGGCAG-C-ACA-G-TGAG-A---T-CC-CATCTCTA-------------------------------
>AluJo_729
--------------------------------------------------GGCTGG--AT---ACAGTGGTTC-ACACC----TG-T-AAT------CC----AAGA-A-C-TA-TGGGAG-GCC----AA---GCC------AA------GAGGATTGC-T-------T--------GAA---T----TAGGA---GCTC-T-AGAC-TAG-CC-T--GGGCAG-C-ACA-G-TGAG-A---T-CC-CATCTCTA-------------------------------
>AluJo_730
--------------------------------------------------GGCCTG--GC---ACAGTGGCTC-ACGCC----TG-T-AAT------CC----CAGT-A-C-TT-TGGGAG-GCC----AA---GAC------AG------GAGGATTCC-C-------T--------AAG-C-C----CAGGA---GTTT-G-AAAT-TAG-CC-T--GGGCAA-C-ATC-G-CAAG-A---C-CC-AGACTCT--------------------------------
>AluJo_731
---------------------------------------------------GCCGG--GT---GCTGTGGCTT-ACATC----TG-T-AAT------CC----CACC-A-C-TT-TGGGAG-AAC----AA---GGC------AG------GAGGATCCC-T-------T--------GAG-C-C----CAGGA---GTTT-G-AGAC-CAC-CC-T--GGTCAA-C-ACA-G-AAAG-G---C-CT-CGTCTCTA-------------------------------
>AluJo_732
--------------------------------------------------GGTTAG--GC---ACAATGATTC-ACATC----TG-T-AAT------CC----CAGC-A-C-TT-TGTGAG--CC----AA---GGT------GG------GTGGATTGC-T-------T--------GAG-C-T----CAGGA---GTTC-A-AGAC-CAG-CC-T--GGGCAA-C-GTG-G-TGAA-A-----CCCCGTCTCTA-------------------------------
>AluJo_733
--------------------------------------------------GGCCGG--AC---ACAGTGACTC-AATCC----TG-T-AAT------CC----CAGC-A-C-TT-TGTGAG-GCT----GA---GGT------GG------GAGGATTGCTT-------T--------GAG-C-T----CAGCA---GTTC-A-AGAC-CAG----T--GGGCAA-C-ATG-G-TGAA-A---C-CC-CATATCTA-------------------------------
>AluJo_734
---------------------------------------------------GCCGG--GC---ACAGTGGCTC-ACTCC----TG-T-AAT------TC----TGGC-ATC-TT-TGGGAG-GCT----GA---GGT------GG------GCAGATTGC-T-------T--------GAG-C-C----CAGCA---GTTC-T-AGAC-CAG-CC-T--GGGCAA-C-GTG-G-TGAA-A---C-CT-TATCTCT--------------------------------
>AluJo_735
---------------------------------------------------GCCGA--GC---GTGGTGGCTC-ACTCC----TA-T-AAA------CC----CAGC-A-C-TG-GGGGAG-GCC----AA---TGC------AG------GAGGATTGC-T-------T--------GAG-C-C----TAGGA---ATTC-A-AGGC-CAG-CT-T--GGGCAA-C-ACA-G-TGAG-A---A-CC-CATCTCTA-------------------------------
>AluJo_736
--------------------------------------------------GGCCGG--GT---GCATTGACTC-ATGCC----TG-T-AAT------CC----TAGC-A-C-TT-TGGGAA-GCC----GA---GGC------AG------GAGAATCAC-T-------T--------GAG-C-C----AAGGA---GCTC-A-AGAC-CAG-CC-T--GAGCAA-C-AGA-T-TGAG-A---C-CC-CATTTCT--------------------------------
>AluJo_737
---------------------------------------------------GCCGG--GC---ATGGTGGCTC-ACACT----TG-T-AAT------CC----CAGT-A-C-TT-TGGGAG-GCC----AA---GGC------AG------GAAGATCAT-T-------T--------GAG-C-C----TAGGA---GTTC-A-GGAG-CAG-CC-T--GGACAG-C-ACA-G-TGAG-A---C-CT-CATCTCCA-------------------------------
>AluJo_738
--------------------------------------------------GGCCAG--GT---TCGGTGACTT-ACCCC----TA-T-AAT------CT----CAGC-A-C-TT-TGGGAG-GCC----AA---GGC------AG------GCAGATCAC-T-------T--------GAG-T-C----CAGAA---GTTC-C-AGAT-GAG-CC-T--GGGCAA-A-ATA-G-CAAG-A---C-CT-CGTTTCT--------------------------------
>AluJo_739
--------------------------------------------------GGCCAG--GC---TCAGTGACTT-ACCCC----TG-T-AAT------CT----CAGC-A-C-TT-TGGGAG-GCC----GA---GGC------AG------GCAGATCAC-T-------T--------GAG-C-C----CAGGA---ATTC-C-AGAT-CAG-CC-T--GGGCAA-A-ATA-G-CAAG-A---C-CT-CATCTCT--------------------------------
>AluJo_740
--------------------------------------------------GGCCAG--GT---TCAGTGACTT-ACCCC----TG-T-AAT------CT----CAGC-A-C-TT-TGGGAG-GCC----GA---GGC------AG------GCAGATCAC-C-------T--------GAG-C-C----CAGGA---ATTC-C-AGAT-CAG-CC-T--GGGCAA-A-ATA-G-CAAG-A---C-CT-CATCTCT--------------------------------
>AluJo_741
--------------------------------------------------GGACAG--CT---GCGGTGACTC-ACACC----TG-T-AAT------CC----CAGC-A-T-TT-TGGGAG-GCC----AG---GGC------AG------GAGGATCGC-T-------T--------GAG-C-C----TAGGA---GTTG-A-AGAC-CAG-CC-T--GGGTAA-C-TTA-G-CAAG-A---CTCT-TGTCTC---------------------------------
>AluJo_742
--------------------------------------------------GGCCTG--GC----TGGTCGCTC-ACACC----TG-T-AAT------CC----CAGC-A-C-TC-TGGGAG-GTT----GA---GGC------AG------GAGGACTGC-T-------T--------GAC-C-C----CAAGA---GTTC-A-AGAC-AAG-CC-T--GAGCAA-C-ACA-G-TAAG-A---C-CT-CGTCTCTA-------------------------------
>AluJo_743
--------------------------------------------------GGCTGG--GT---GTGGTGGCTC-ACATC----TG-T-GAT------CC----CAAC-A-C-TT-TGGGAG-GCT----GA---GGT------AG------GAGGATCAC-T-------T--------GAG-T-C----CAAAG---GTTC-A-GGAT-CAA-CC-T--GGGCAA-C-ATA-G-TGAG-A---C-CC-CATCTCT--------------------------------
>AluJo_744
---------------------------------------------------GCCAG--GC---GTGGTGACTC-ACACC----TG-T-AAC------TC----CAGC-A-C-TT-TGGGAG-GCT----CA---GGC------AG------GGGGATCAC-T-------T--------GAG-C-T----CAGGA---GTTA-G-AGAC-CAG-CC-T--TGGCAC-C-ATA-G-TGAG-A---C-CC-TATCTCTA-------------------------------
>AluJo_745
--------------------------------------------------GGCCAG--GT---GTGGTGGCTC-ACGTC----TT-T-AAT------CT----CAGC-A-C-TT-TGGGAG-GCT----GA---GGG------AG------GCAGATCAC-T-------T--------GAG-C-C----CAGGA---GTTT-G-AGAC-TAG-CC-T--GGGCAA-C-ACA-G-GGAG-A---G-CC-CATCTCT--------------------------------
>AluJo_746
--------------------------------------------------GGCCAG--GC---GAGGTGGCTT-ACACC----TA-T-AAT------CC----CAGC-A-C-TT-TGGGAG-GCA----GA---GGC------AG------GAGGATCAC-T-------C--------AAG-C-C----CAGGA---GTTT-G-AGAA-CAG-CC-T--GGGTAA-C-ATA-G-TGAG-A---C-CC-AATCTTT--------------------------------
>AluJo_747
--------------------------------------------------GGTCGG--GC---GTGGTGGTTC-ACACC----TG-T-AAT------CT----CAGC-A-C-TT-TGGGAG-ACT----GA---GGC------AG------GAGGATCAC-T-------T--------GAG-C-C----CAGGA---GTCC-A-AAAC-CAG-TC-T--GGGCAA-C-ATA-G-TGAG-A---C-CC-CATCTCT--------------------------------
>AluJo_748
--------------------------------------------------GGCCAG--GC---GTGGTGGCTC-ACATC----TA-T-AAT------CT----CAGC-A-C-TT-TGGGAG-GCT----GA---GGC------AG------GAGGATCAC-T-------T--------GAG-C-T----CAGGA---GTTC-G-GGAT-CAG-CC-T--GGGCAA-C-ATA-G-TGAG-A---C-CT-CATCTCT--------------------------------
>AluJo_749
---------------------------------------------------GCTGA--GT---GAAGTGGCTT-ATGCC----TG-T-AAT------CT----CAGC-A-C-TT-TGGGAG-GCC----AA---GGC------AG------GAGGATCAT-T-------T--------GAG-C-G----CAGGA---GTTC-A-AAAC-CAG-CC-T--GGGCAA-T-AAA-G-CAAG-A---T-CC-CATCTCTA-------------------------------
>AluJo_750
--------------------------------------------------GGCCAG--TT---GTGGTGGTTC-ATGCC----TA-T-AAT------CC----CGGT-A-C-TT-TGGGAG-GCC----AA---GTT------AG------GAGGATCAC-T-------T--------GAG-C-C----CAGGA---TTTC-T-AGAC-TAG-CC-T--GGACAA-C-ATA-A-AGAG-A---C-CC-CATCTCT--------------------------------
>AluJo_751
--------------------------------------------------GGCTGG--GT---GTGGTGGCTT-ACACC----TG-T-AAT------GT----CAGC-A-C-TT-TGGGAG-GCC----AA---GGC------AG------GTGGATCCC-T-------T--------GAG-C-T----CAGGA---GCTC-G-AGAG-CAG-CT-T--GGGCAA-C-ATA-G-CAAA-A---C-CC-TGTCTCT--------------------------------
>AluJo_752
--------------------------------------------------GGCCAG--AA---GTGATGGCTT-ACATC----TG-T-AAT------CC----CAGG-A-C-TT-TGGGAG-GGC----AA---GGC------AG------AAGGATCGC-T-------T--------CAG-C-C----CAGGA---GTTT-G-AGAC-CAG-CC-T--GGACAA-C-AAA-G-CGAG-A---C-CT-CGTCTCT--------------------------------
>AluJo_753
--------------------------------------------------GGCCAG--GT---ACAGAGGCTC-ACGCC----TG-T-GAT------CC----CAGC-A-C-TC-TGGGAG-GGC----GA---GGC------AG------GAGGATCGC-T-------T--------GAG-C-T----CAGGA---GTTT-G-AGAC-CAG-CC-T--GGGCAA-C-ATG-G-CGAA-G---C-TC-GGTTTCT--------------------------------
>AluJo_754
--------------------------------------------------GGCTGG--GC---GAGGCAGCTC-ACACC----TG-T-AAT------CC----CAGT-A-C-TT-TGGGAT-ATC----AA---GGC------GG------GCGGATCAC-T-------T--------GAG-T-C----CAGGA---GTTC-A-AGAC-CAG-CC-T--GGGCAA-C-ATA-A-CAAA-A---C-AC-CGTCTCT--------------------------------
>AluJo_755
--------------------------------------------------GGCCGG--GC---ATGGTAGCTC-ACACC----TG-T-AAT------TC----CAGC-A-C-TT-TGAGAG-GCT----AA---GGC------GG------GA-GATTGC-T-------T--------GAA-C-T----CCAGA---ATTC-A-AGAC-CAG-CC-T--GGGCAA-T-ACA-G-TGAG-A---C-CC-TGTCTCTA-------------------------------
>AluJo_756
--------------------------------------------------GACCAG--GT---GCAGTGGCTC-ATGCC----TG-T-AAT------CC----CAGG-A-C-TT-TGGGAG-GCC----AA---GGC------AG-------GTGATCAC-T-------T--------AAG-C-C----CAGGT---GTTC-A-AGAC-CAG-CC-T--GGGCAA-C-ATA-C-CAAG-A-----CATTGTTTCTA-------------------------------
>AluJo_757
---------------------------------------------------GCCAG--GC---ACTTTGACTC-ACACC----TG-T-AAT------CC----CAGC-A-C-TT-TGGGAG-GGC----AA---GGC------AG------GAAGATTGC-T-------T--------GAA-C-C----CAGGA---ATTG-A-AGAC-CAG-CC-T--GGGCAA-C-GTG-G-TGAA-A---C-CC-TGTCTCTA-------------------------------
>AluJo_758
--------------------------------------------------GGCCAG--GC---ACAGTGGCTC-ACATC----TG-T-AAT------CC----CAGA-A-C-TT-TGGGAG-GGA----AA---AGT------GG------GAGGACTGC-A-------T--------GAG-C-C----CAGGA---GTTC-A-AGAC-TTG-CC-T--GGACAA-C-AAA-G-GAAG-A---C-CC-TGACTCT--------------------------------
>AluJo_759
---------------------------------------------------GCCAG--GC---ACGGTGGCTC-ACGCC----TG-T-AAT------CC----CAGT-A-T-TT-TGGGAG-TCC----AA---GGC------AG------GAGGATTGC-T-------T--------GAG-C-C----CAGCA---GTTC-A-AGAC-CAG-CC-T--GGGCAA-C-ACA-G-GGAG-G---C-TA-CCTCTCTC-------------------------------
>AluJo_760
--------------------------------------------------GGCCAG--GT---GTGGTGGCTC-ACTGC----TA-G-CCT------CC----TAGC-A-C-TT-TGGGAG-GCA----GA---AGC------AG------GGAGATCAC-T-------T--------GAG-C-T----CAGCA---GTTC-A-AGAC-CAG--C-T--AGGCAA-C-ATA-G-TGAG-A---C-CC-CATCTCTA-------------------------------
>AluJo_761
--------------------------------------------------GGCCAG--GT---GTGGTGGCTC-ACTGC----TG-T-AAT------CC----TAGC-A-C-TT-TGGGAG-GCA----GA---AGC------AG------GGAGATCAC-T-------T--------GAG-C-T----CAGTA---GTTC-A-AGAC-CAG--C-T--AGGCAA-C-ATA-G-TGAG-A---T-CC-CATCTCTA-------------------------------
>AluJo_762
--------------------------------------------------GGCCAG--GT---GTGGTGGCTC-ACTGC----TG-T-AAT------CC----TAGC-A-C-TT-TGGGAG-GCA----GA---AGC------AG------GGAGATCAC-T-------T--------GAG-C-T----CAGTA---GTTC-A-AGAC-CAG--C-T--AGGCAA-C-ATA-G-TGAG-A---T-CC-CATCTCTA-------------------------------
>AluJo_763
--------------------------------------------------GGCCAG--GT---GTGGTGGCTC-ACTGC----TG-T-AAT------CC----TAGC-A-C-TT-TGGGAG-GCA----GA---AGC------AG------GGAGATCAC-T-------T--------GAG-C-T----CAGCA---GTTC-A-AGAC-CAG--C-T--AGGCAA-C-ATA-G-TGAG-A---C-CG-CATCTCTA-------------------------------
>AluJo_764
--------------------------------------------------GGCCAG--GT---GTGGTGGCTC-ACTGC----TG-T-AAT------CC----TAGC-A-C-TT-TGGGAG-GCA----GA---AGC------AG------GGAGATCAC-T-------T--------GAG-C-T----CAGCA---GTTC-A-AGAC-CAG--C-T--AGGCAA-C-ATA-G-TGAG-A---C-CC-CATCTCTA-------------------------------
>AluJo_765
--------------------------------------------------GGCCAG--GT---GTGGTGGCTC-ACTGC----TG-T-AAT------CC----TAGC-A-C-TT-TGGGAG-GCA----GA---AGC------AG------GGAGATCAC-T-------T--------GAG-C-T----CAGCA---GTTC-A-AGAC-CAG--C-T--AGGCAA-C-ATA-G-TGAG-A---C-CC-CATCTCTA-------------------------------
>AluJo_766
--------------------------------------------------GACCAG--GC---ATGGTGGCTC-ACACC----TG-T-AAT------CC----CAGG-A-C-TT-TGGGAG-GTC----AG---GGC------AC------AAGGATTGC-T-------T--------GAG-C-C----CAGGA---GTTC-A-AGAC-CAG-CC-T--GGGAAA-C-ACA-G-AGAA-A---A-CC-CATCTCT--------------------------------
>AluJo_767
--------------------------------------------------GGCCAG--GT---GCAGTGGCTC-ACGCC----TG-T-AAT------CC----CAGC-A-C-TG-TAGAAG-GCT----GA---GGT------GG------GCAGATCTC-T-------T--------GAG-C-C----TAGGA---GTTC-A-AGAC-CAG-CC-T--GGGAAA-C-ATA-G-CAAG-A---A-CA-AGTCTCT--------------------------------
>AluJo_768
--------------------------------------------------GGCCAG--GC---ACTGTGGCTC-ACACC----TG-T-AAT------TC----CAGC-A-C-TT-TGGGAG-GCT----GA---GGC------GG------AAGGATCGC-T-------T--------GAG-T-C----TAGGC---ATTA-G-ACAC-CAG-CC-T--GGGAAA-C-ATA-G-TGAG-A---C-CT-TGTCTCT--------------------------------
>AluJo_769
--------------------------------------------------GGTTGG--GT---GCAGTGGCTC-AGGCC----TG-T-AAT------CC----CAGC-A-C-TT-TGAGAG-GCC----AA---GGC------AG------GAAGATCAC-T-------T--------GAG-C-C----CAGGA---GTTC-A-AAAC-CAG-CC-T--GAGCAA-C-ATA-G-CAAG-A-----CC-TGCCTCTA-------------------------------
>AluJo_770
--------------------------------------------------GGCCGG--GC---GCAGTGACTC-ATACC----TG-T-AAT------CC----CAGC-A-C-TT-TGGGAG-GCC----AA---AGT------GG------GTGGATTAC-TTAAGCCCT--------GAG-C-C----CAGGA---GTTC-A-AGAC-CAG-CC-T--GGACAA-C-AAA-G-GGAG-A---C-CC----------------------------------------
>AluJo_771
--------------------------------------------------GGCTGG--GT---GCAGTGGCCC-ATGCC----TG-T-AAT------TC----CAGC-A-C-TT-T-TGAG-GCC----AA---GGC------AG------GAGGATCCC-T-------T--------GAG-C-C----CAGGA---GTTC-A-AGAC-CAG-CC-T--GGGCAA-C-ATA-G-CGCA-A---C-CC-TGTCTCTA-------------------------------
>AluJo_772
--------------------------------------------------GGCTGG--GA---GCAGTGGCTG-ATACC----TG-T-AAT------CC----CAGC-A-C-TT-T-GGAG-GCC----AA---GGC------AG------GAGGATCAC-T-------T--------GAG-C-C----CAGGA---GTTC-A-AGAC-CAG-CC-T--GGACAA-C-ATA-G-GGAA-A---C-CA-TGCCTCTA-------------------------------
>AluJo_773
--------------------------------------------------GGCCAG--GT---GGGGTGGTTC-ACACC----TG-T-AAT------CC----CAGC-A-C-TC-TGGGAA-GCC----AA---AGC------TT------GAGAATCAC-T-------T--------GAA-C-C----CAGGA---GTTC-A-AGAC-CAG-CC-T--GGGCAA-C-ATA-G-CAAG-A---C-CC-TGTCTCT--------------------------------
>AluJo_774
--------------------------------------------------GACCAG--GC---ACCATGGCTC-ACGCC----TG-T-AAT------CC----CAAC-A-C-TT-TGGGAG-GCC----AA---GGT------GG------GCAGGTCAC-T-------T--------GAG-C-C----CAGGA---GTTC-C-AGAC-CAG-CC-T--GGGTAA-C-ATA-G-TGAG-A---C-CC-TGTTTCT--------------------------------
>AluJo_775
--------------------------------------------------GGCGGG--GT---ATGGTGGCTC-ATACC----TG-T-AAT------CT----CAAC-A-C-TT-TGAGAA-CCC----AA---GGC------AG------GAGGACTGC-T-------T--------GAG-C-C----CAGGA---GTTC-A-AGAC-CAG-CC-T--GGACAA-C-ACA-G-TGAG-A---C-CC-CATCTCT--------------------------------
>AluJo_776
---------------------------------------------------GCCAG--GC---ACAATGGCTC-ACACC----TG-T-AAT------CC----CAGC-A-C-TT-TGGGAG-GCC----AA---GGC------AG------TAGG-TCAC-A-------T--------GAG-C-C----CAGGA---GTTC-A-AGAC-CAG-CC-T--GGGCAA-C-ATA-G-GGAA-A---C-CC-CATTTCTAC------------------------------
>AluJo_777
--------------------------------------------------GGCCAG--GT---GTGATGGCTT-ACTCC----TG-T-GAT------CT----CAGC-A-C-TT-TTGGAG-GCC----AA---GGC------AG------GAGGATTGC-T-------T--------GAG-C-T----CAGGA---GTTT-G-AGAC-CAG-CC-T--GGGCAA-C-ATA-G-TGAG-A---C-CT-CATCTCT--------------------------------
>AluJo_778
--------------------------------------------------GGCCAG--GC---ACAGAGGCTC-ACACC----TG-T-AAT------CC----CAGC-A-C-TT-TGGGAG-GCC----AA---GAC------AG------GAGGATCAC-T-------T--------GAG-C-C----CAGGA---CTTC-G-AGAT-CAG-CC-T--GCACAA-C-ATA-A-GGAG-A---C-CC-TGTCTCT--------------------------------
>AluJo_779
--------------------------------------------------GGCCAG--GT---GCAGTGGCTC-ACACC----TG-T-AAT------CC----CAGC-A-C-TT-TGGGAG-GCT----GA---GGC------TG------GAAGATCAC-T-------T--------GAG-C-C----TAGGA---ATTC-A-AAAC-CAG-CC-T--GGGAAA-C-ACA-G-CGAG-A---C-CT-TGTCTCT--------------------------------
>AluJo_780
--------------------------------------------------GGGCAG--GT---GCAGTGGCTC-ACACC----TG-T-AAT------CC----CAGC-A-C-TG-TGGGAG-GCC----AA---GGC------AG------GAGGATCAC-T-------T--------GAG-C-C----CAGGA---ATTC-A-AGAT-CAG--C-T--GGGCAA-C-ATA-G-CGAG-A---C-CC-TGTCTCTA-------------------------------
>AluJo_781
--------------------------------------------------GGCTGG--GC---ACAATGGCTC-ACACC----TA-T-AAT------CC----CAGC-A-C-TT-TGGGCA-GCC----GA---GGC------AG------AAGGATTGC-T-------T--------GAG-C-C----CAGGA---GTTC-A-AGAC-CAA-CC-T--GGGCAA-T-ATA-G-TGAG-A---C-CC-CATTTCT--------------------------------
>AluJo_782
--------------------------------------------------GGCCAG--GT---GCAGTGTCTC-ACACC----TG-T-AAT------CC----TAGC-A-C-TT-TGGGAG-GCC----GA---AGC------AG------GAGGATTGC-T-------T--------GAG-C-C----CAGGA---GTTC-A-AGAC-CAG-CT-T--GGGGAA-C-ACA-G-GGAG-A---C-CA-CATATCT--------------------------------
>AluJo_783
--------------------------------------------------GGCCAG--GT---GTGGTGGCTC-ATTCC----TG-T-AAT------CC----CAGA-A-C-TT-TGGGAG-GCT----AA---GGC------AG------GAGGATTAC-T--------------------------------------T-G-AGAC-CAG-CC-T--GGACAA-C-TTA-G-TGAG-A---C-CG-CATCTCTAGAGTAAAAATACA------------------
>AluJo_784
---------------------------------------------------GCCAG--GT---GGAGTGGTTC-ATACC----TG-T-AAT------CC----CAGC-A-C-TT-TGGAAG-GCC----AA---GGC------AG------GAGGATTAC-T-------T--------GAG-C-C----CAGGA---GTTC-A-AGAC-CAG-CC-T--GGGCAA-C-ATA-G-TGAG-A---C-CG-TATCTTTA-------------------------------
>AluJo_785
-----------------------------------------------------------------------TC-ACACC----TG-T-AAT------CC----CAGC-A-C-TT-TGGAAG-GCC----AA---GGC------AG------GATGATTGC-T-------T--------GAG-C-A----CAGGA---GTTC-A-AGAC-CAG-CC-T--GG-CAA-C-ACA-G-TGAG-A---C-CC-CATTTCTACAAAAAACAAAATTTA---------------
>AluJo_786
---------------------------------------------------GCCAG--GCATGGCAGCAGCTC-ACACC----TG-T-AAT------CC----CAGT-A-C-TT-TGGGAG-GCC----AA---GGC------AG------GAGGATCCCTTGATTCCATTTCCATGTGAG-C-A----CAGGA---GTTT-A-AGAC-CAG-CC-T--GGCCAA-C------------A-----------------------------------------------
