# Supplementary material
Source: HighWire-hosted journal article supplement (doi:10.1101/rna.080359.124)
Supplement: Supplemental_Table_S2.xlsx [file Supplemental_Table_S2.xlsx]

## Sheet: Supplementary Table S2
Supplementary Table S2. Solution Properties of BC120, BC120 G25C, and EB120
Parameters	BC120	BC120 G25C	EB120
Sequence molecular weight (Da)	38878	38838	38817
Guinier I(0)	0.1200 ± 0.0001	0.0580 ± 0.0008	0.0300 ± 0.0006
Guinier RG (nm)	4.031 ± 0.006	4.086 ± 0.009	4.233 ± 0.014
P(r) I(0)	0.1257 ± 0.0009	0.0582 ± 0.0006	0.0295 ± 0.0005
P(r) RG (nm)	4.265 ± 0.005	4.300 ± 0.007	4.299 ± 0.008
Dmax (nm)	13.6	13.83	13.4
χ2	1.12	1.12	1.11
NSD	0.63 ± 0.01	0.67 ± 0.01	0.84 ± 0.03
